# Supplementary material for: Straightforward construction of a rare-earth diphosphanato complex from white phosphorus: synthesis and reactivity
Source: Royal Society of Chemistry journal article supplement (doi:10.1039/d3qi02680a), 2024-01-01
Supplement: d3qi02680a1.pdf [file d3qi02680a1.pdf]

---

## Straightforward Construction of Rare Earth Diphosphanato Complex from White Phosphorus: Synthesis and Reactivity\*\*

Fangjun Zhang,<sup>a</sup> Iker del Rosal,<sup>b</sup> Keyu Han,<sup>a</sup> Jie Zhang,<sup>\*a</sup> Laurent Maron,<sup>\*b</sup> and Xigeng Zhou<sup>\*a</sup>

---

[a] Department of Chemistry, Fudan University, Shanghai 200438, China.

[b] LPCNO, CNRS, and INSA, Université Paul Sabatier, 135 Avenue de Rangueil, Toulouse 31077, France

\* E-mail: [zhangjie@fudan.edu.cn](mailto:zhangjie@fudan.edu.cn); [xgzhou@fudan.edu.cn](mailto:xgzhou@fudan.edu.cn); [laurent.maron@irsamc.ups-tlse.fr](mailto:laurent.maron@irsamc.ups-tlse.fr)

### Table of Contents

|                                                                                      |     |
|--------------------------------------------------------------------------------------|-----|
| Table of Contents.....                                                               | 1   |
| 1. Experimental Procedures.....                                                      | 1   |
| 2. Synthesis and characterization of Complexes <b>1-10</b> .....                     | 2   |
| 3. X-ray Crystallographic Analysis of Complexes <b>1-10</b> .....                    | 19  |
| 4. Molecular structures and important bond parameters of complexes <b>1-10</b> ..... | 25  |
| 5. Computational details of complexes <b>3</b> and <b>4</b> .....                    | 36  |
| References.....                                                                      | 106 |

### Experimental Procedures

All manipulations involving air- and moisture-sensitive compounds were carried out with rigorous exclusion of air and water, using standard Schlenk techniques or a Vigor glovebox under an atmosphere of dinitrogen. THF, toluene and hexane were purified using an Mbraun SPS-800 Solvent Purification System, dried over fresh Na chips and stored in the glovebox in the glovebox. C<sub>6</sub>D<sub>6</sub> and THF-*d*<sub>8</sub> were obtained from Cambridge Isotope and dried over Na/K alloy prior to use. (Tp<sup>Me2</sup>)YBn<sub>2</sub>(THF) and KBn were prepared according to literature procedure<sup>[1,2]</sup>. (CH<sub>3</sub>)<sub>3</sub>SiCl, CH<sub>3</sub>OH, <sup>i</sup>Pr<sub>2</sub>NH, and HPPH<sub>2</sub> were purchased from J&K and dried with 4Å sieves. Other commercially available reagents were purchased and used without purification. P<sub>4</sub> was prepared by sublimation of red phosphorus at 450 °C in quartz tube under vacuum condition and stored in the refrigerator of the glovebox. Organometallic samples for NMR spectroscopic measurements were prepared in the glovebox using J. Young valve NMR tubes. <sup>1</sup>H NMR, <sup>13</sup>C NMR and <sup>31</sup>P NMR spectra were recorded on a Bruker Avance 400 MHz spectrometer (FT, 400 MHz for <sup>1</sup>H; 100 MHz for <sup>13</sup>C; 161 MHz for <sup>31</sup>P) at room temperature. Chemical shifts for <sup>1</sup>H and <sup>13</sup>C NMR were quoted in ppm referenced to the residual resonance of the deuterated solvents. H<sub>3</sub>PO<sub>4</sub> (85%) sealed in a capillary was used as an external standard in the <sup>31</sup>P NMR analysis. Elemental analyses for C, H and N were carried out on a Vario EL III elemental analyzer. *The resonances of B-H bond in the Tp<sup>Me2</sup> ligand are too broad to be observed in their <sup>1</sup>H NMR spectra. **Caution:** P<sub>4</sub> is light-sensitive and highly flammable upon exposure to air. It should be handled carefully.*

## 2. Synthesis and characterization of complexes 1-10.

### 2.1 Synthesis and characterization of $(\text{Tp}^{\text{Me}_2})\text{Y}[\eta^2\text{-C,N-CH}_2\text{Si(CH}_3)_2\text{NSi(CH}_3)_3](\text{THF})$ (**1**).

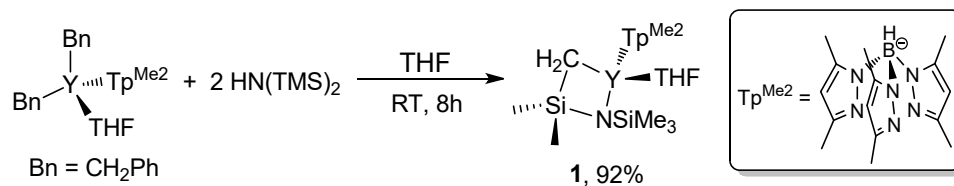

A THF solution of  $\text{HN}[\text{Si}(\text{CH}_3)_3]_2$  (3.22 g, 20.0 mmol) was added slowly to a stirred THF solution (50 mL) of  $\text{Tp}^{\text{Me}_2}\text{YBn}_2(\text{THF})$  (6.40 g, 10.0 mmol) at room temperature. After stirring for 8 hours, all the volatiles were removed under vacuum. The residue was washed by *n*-hexane two times (10 mL $\times$ 2) and dried under vacuum to give **1** as a white powder (5.67 g, 92% yield). Recrystallization of the white powder in a mixed solvent of THF and *n*-hexane afforded colorless crystals of **1** suitable for X-ray diffraction analysis.  $^1\text{H}$  NMR (400 MHz,  $\text{C}_6\text{D}_6$ , 25  $^\circ\text{C}$ ):  $\delta$  (ppm) 5.56 (s, 3H, 4-*H*- $\text{Tp}^{\text{Me}_2}$ ), 3.56 (m, 4H, *THF*), 2.50 (s, 9H, 3- $\text{CH}_3$ - $\text{Tp}^{\text{Me}_2}$ ), 2.10 (s, 9H, 5- $\text{CH}_3$ - $\text{Tp}^{\text{Me}_2}$ ), 1.14 (m, 4H, *THF*), 0.79 (s, 6H,  $\text{Si}(\text{CH}_3)_2$ ), 0.33 (s, 9H,  $\text{Si}(\text{CH}_3)_3$ ), 0.13 (d,  $^2J_{\text{YH}} = 1.6$  Hz, 2H,  $\text{SiCH}_2\text{Y}$ );  $^{13}\text{C}\{^1\text{H}\}$  NMR (100 MHz,  $\text{C}_6\text{D}_6$ , 25  $^\circ\text{C}$ ):  $\delta$  (ppm) 150.13 ( $\text{Tp}^{\text{Me}_2}$ ), 145.49 ( $\text{Tp}^{\text{Me}_2}$ ), 105.91 (4-*C*- $\text{Tp}^{\text{Me}_2}$ ), 71.27 (*THF*), 26.90 (d,  $^1J_{\text{YC}} = 30.81$  Hz,  $\text{SiCH}_2\text{Y}$ ), 25.29 (*THF*), 14.73 ( $\text{CH}_3$ - $\text{Tp}^{\text{Me}_2}$ ), 13.07 ( $\text{CH}_3$ - $\text{Tp}^{\text{Me}_2}$ ), 8.33 (s,  $\text{Si}(\text{CH}_3)_2$ ), 8.32 (s,  $\text{Si}(\text{CH}_3)_2$ ), 5.74 ( $\text{Si}(\text{CH}_3)_3$ ). Elemental Analysis: Calcd. (%) for  $\text{C}_{25}\text{H}_{47}\text{N}_7\text{BOSi}_2\text{Y}$ : C, 48.62; H, 7.67; N, 15.88. Found: C, 48.04; H, 7.74; N, 16.17.

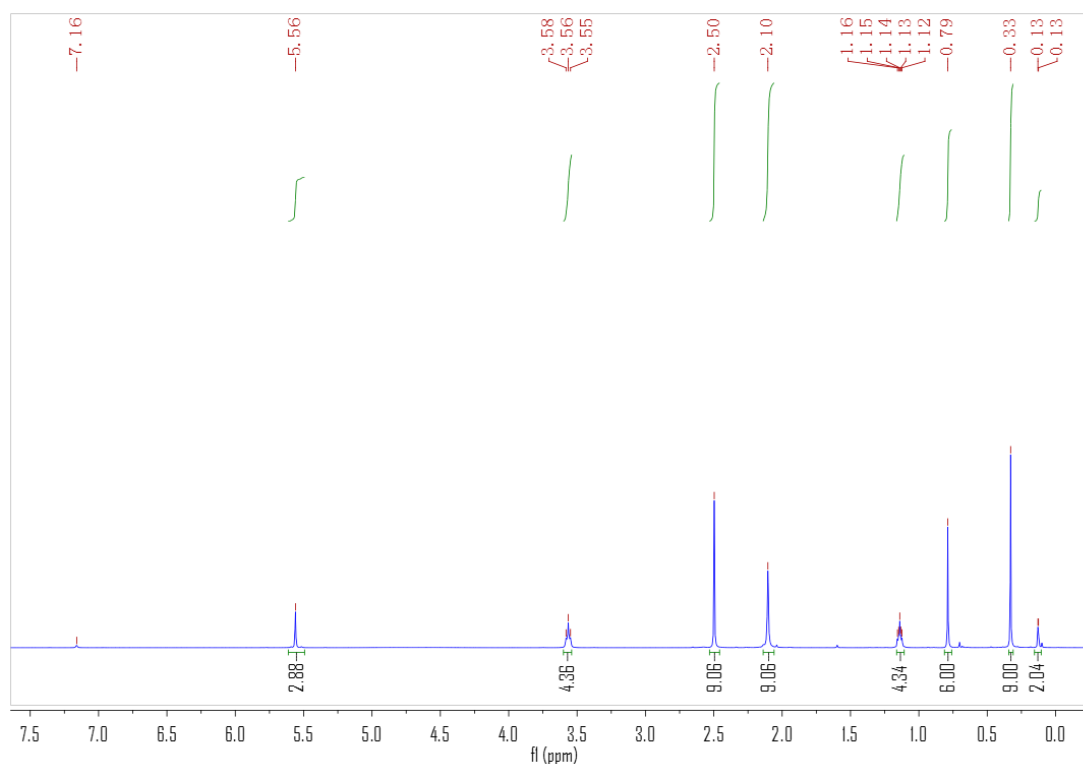

**Figure S1.**  $^1\text{H}$  NMR spectrum of complex **1** in  $\text{C}_6\text{D}_6$  at room temperature.

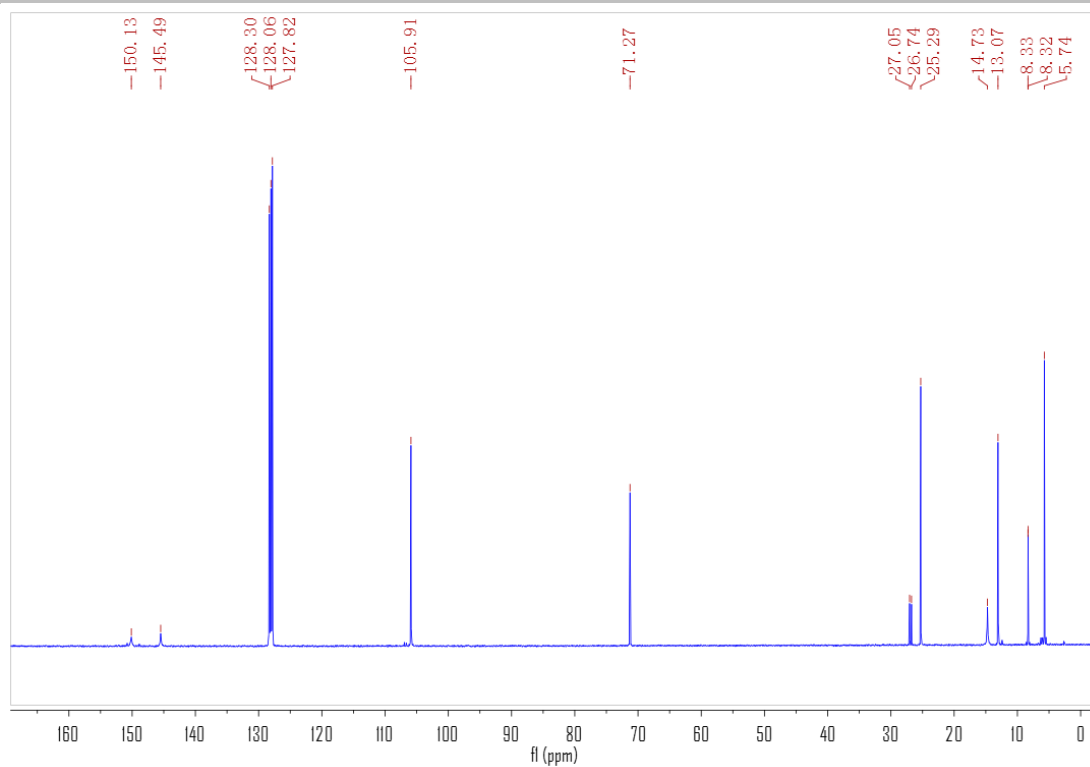

**Figure S2.**  $^{13}\text{C}\{^1\text{H}\}$  NMR spectrum of complex **1** in  $\text{C}_6\text{D}_6$  at room temperature.

## 2.2 Synthesis and characterization of diphosphanato yttrium complex **2** and **2·THF**.

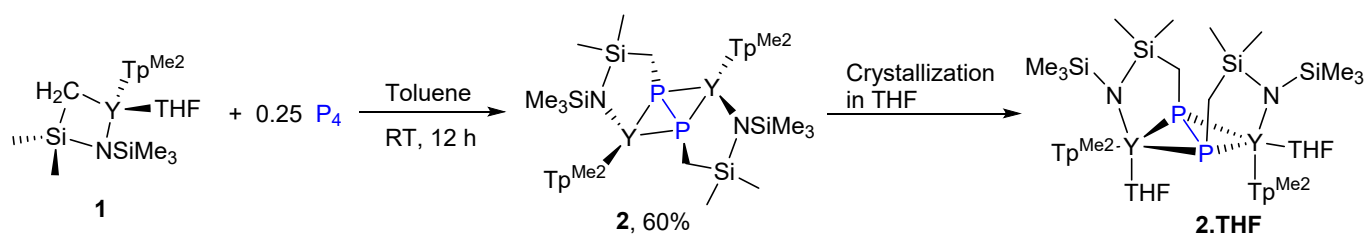

P<sub>4</sub> (31.0 mg, 0.25 mmol) was added to a stirred toluene solution (2 mL) of **1** (617 mg, 1.0 mmol) at ambient temperature. The reaction mixture gradually changed from light yellow to reddish brown. After a half hour, a pale solid began to precipitate out. The mixture was continued to stir for overnight, the precipitation was filtered under reduced pressure and washed by 2 mL *n*-hexane and dried under vacuum to give **2** as a light yellow powder (342 mg, 60% yield). Yellow crystals of **2** suitable for X-ray single crystal diffraction analysis were obtained by evaporation of the solvent of the solution of **2** in 30:1 toluene and THF mixture. <sup>1</sup>H NMR (400 MHz, THF-*d*<sub>8</sub>, 25 °C): δ (ppm) 5.76 (s, 2H, 4-*H*-Tp<sup>Me2</sup>), 5.74 (s, 2H, 4-*H*-Tp<sup>Me2</sup>), 5.25 (s, 2H, 4-*H*-Tp<sup>Me2</sup>), 2.67 (s, 6H, CH<sub>3</sub>-Tp<sup>Me2</sup>), 2.59 (s, 6H, CH<sub>3</sub>-Tp<sup>Me2</sup>), 2.38-2.33 (m, 24H, CH<sub>3</sub>-Tp<sup>Me2</sup>), 1.29 (s, 4H, SiCH<sub>2</sub>P), 0.27 (s, 12H, Si(CH<sub>3</sub>)<sub>2</sub>), 0.15 (s, 18H, Si(CH<sub>3</sub>)<sub>3</sub>); <sup>13</sup>C{<sup>1</sup>H} NMR (100 MHz, THF-*d*<sub>8</sub>, 25 °C): δ (ppm) 152.66 (Tp<sup>Me2</sup>), 151.79 (Tp<sup>Me2</sup>), 150.55 (Tp<sup>Me2</sup>), 145.46 (Tp<sup>Me2</sup>), 145.35 (Tp<sup>Me2</sup>), 144.63 (Tp<sup>Me2</sup>), 106.80 (4-*C*-Tp<sup>Me2</sup>), 106.20 (4-*C*-Tp<sup>Me2</sup>), 19.22 (CH<sub>3</sub>-Tp<sup>Me2</sup>), 15.65 (CH<sub>3</sub>-Tp<sup>Me2</sup>), 14.67 (m, SiCH<sub>2</sub>P), 13.31 (CH<sub>3</sub>-Tp<sup>Me2</sup>), 13.18 (CH<sub>3</sub>-Tp<sup>Me2</sup>), 13.06 (CH<sub>3</sub>-Tp<sup>Me2</sup>), 8.43 (Si(CH<sub>3</sub>)<sub>2</sub>), 8.15 (Si(CH<sub>3</sub>)<sub>2</sub>), 6.15 (Si(CH<sub>3</sub>)<sub>3</sub>); <sup>31</sup>P NMR (161 MHz, THF-*d*<sub>8</sub>, 25 °C): δ (ppm) -97.10 (t, <sup>1</sup>J<sub>YP</sub> = 30 Hz). Elemental Analysis: Calcd. (%) for C<sub>42</sub>H<sub>78</sub>N<sub>14</sub>B<sub>2</sub>Si<sub>4</sub>P<sub>2</sub>Y<sub>2</sub>: C, 43.76; H, 6.82; N, 17.00. Found: C, 42.86; H, 6.69; N, 17.33. It is noted that recrystallization of **2** in THF afforded **2·THF** as yellow crystals. Elemental Analysis: Calcd. (%) for C<sub>50</sub>H<sub>94</sub>N<sub>14</sub>B<sub>2</sub>O<sub>2</sub>Si<sub>4</sub>P<sub>2</sub>Y<sub>2</sub>: C, 46.30; H, 7.30; N, 15.12. Found: C, 45.66; H, 7.14; N, 15.37. However, the difficulty in redissolving the isolated crystals of **2·THF** prevented its characterization by NMR spectroscopy.

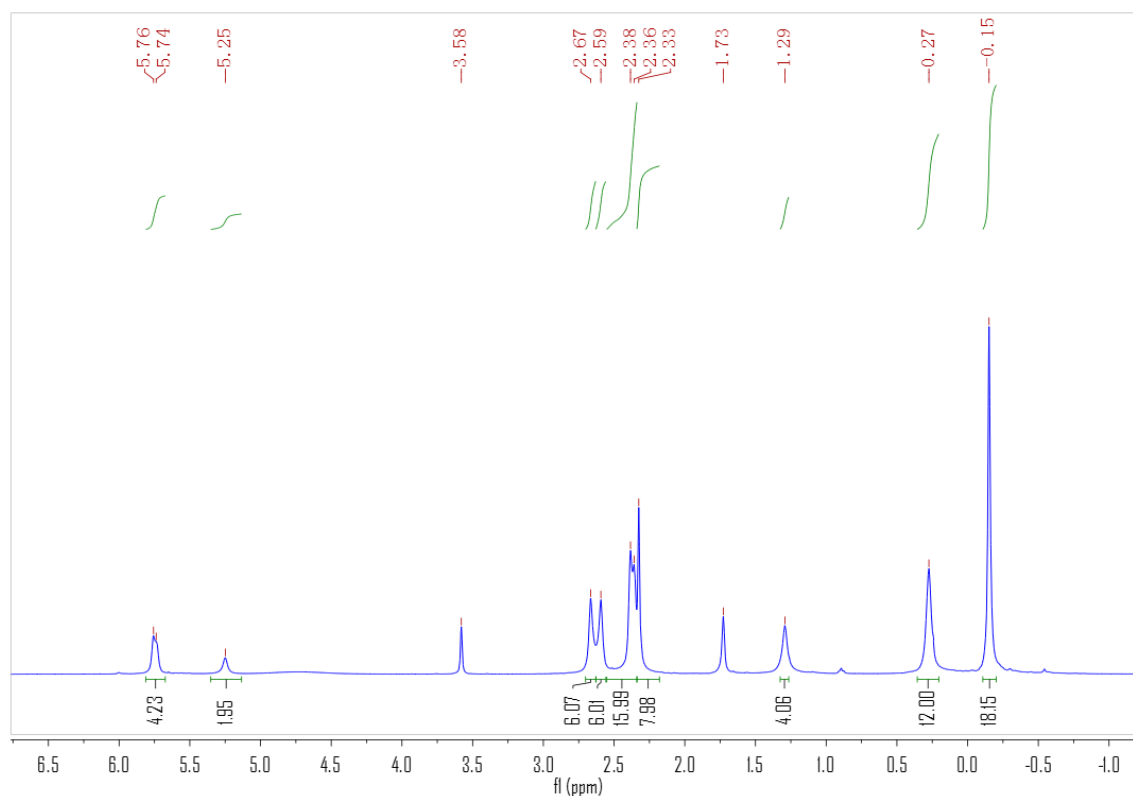

**Figure S3.** <sup>1</sup>H NMR spectrum of complex **2** in THF-*d*<sub>8</sub> at room temperature.

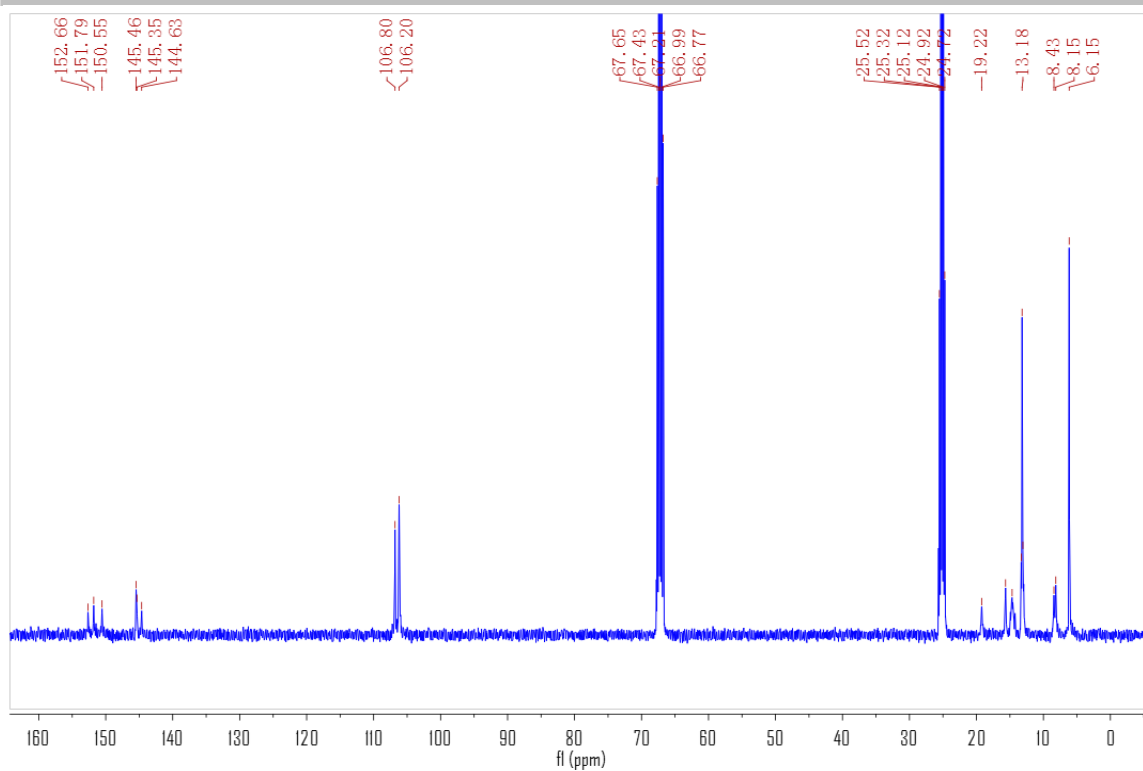

Figure S4.  $^{13}\text{C}\{^1\text{H}\}$  NMR spectrum of complex **2** in  $\text{THF-}d_8$  at room temperature.

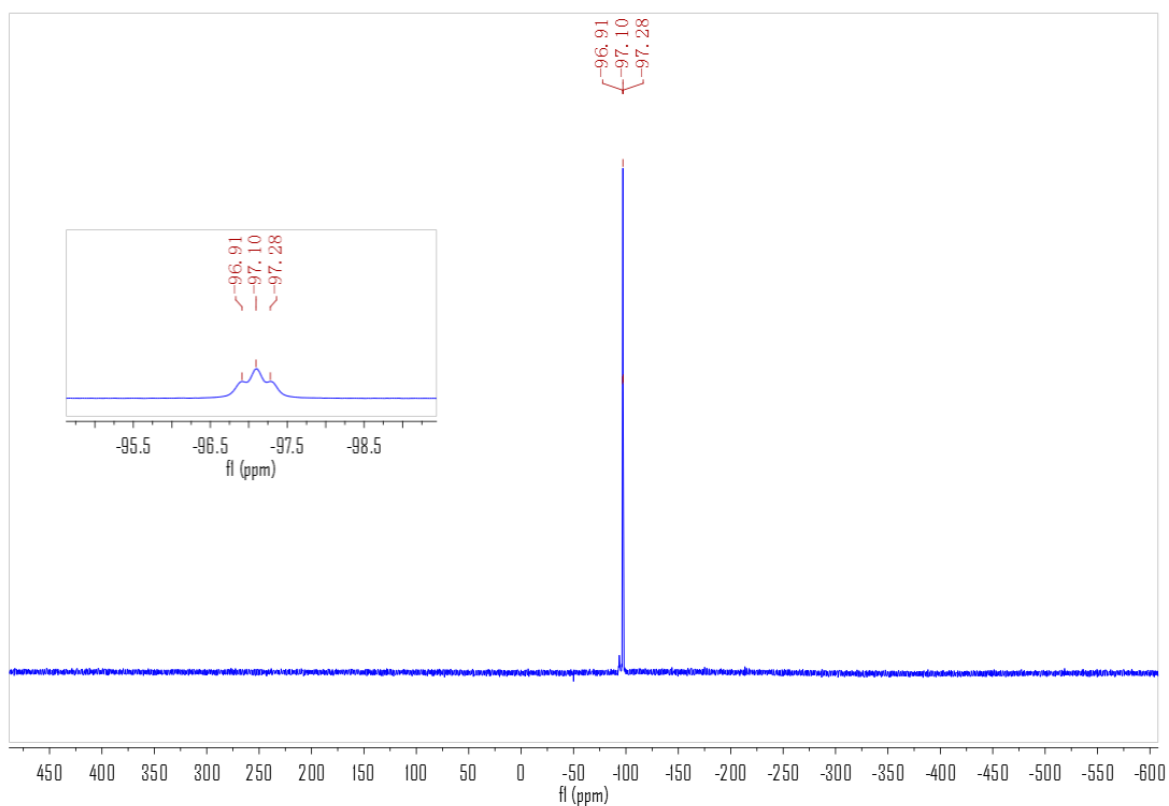

Figure S5.  $^{31}\text{P}$  NMR spectrum of complex **2** in  $\text{THF-}d_8$  at room temperature.

### 2.3 Synthesis and characterization of complex **3**.

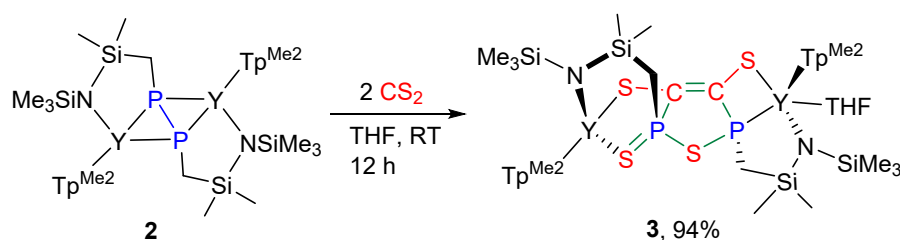

A cooled THF solution (5 mL) of CS<sub>2</sub> (30.3 mg, 0.40 mmol) was added slowly to a stirred THF solution (10 mL) of **2** (230 mg, 0.20 mmol) at ambient temperature. The mixture gradually changed from yellow to reddish brown. After stirring for 1 hour, the solvent was removed under vacuum and the residue was washed by *n*-hexane two times (10 mL×2) and dried under vacuum to give **3** as a yellow powder (260 mg, 94% yield). Crystals suitable for X-ray analysis were obtained by recrystallization of **3** in toluene. <sup>1</sup>H NMR (400 MHz, THF-*d*<sub>8</sub>, 25 °C): δ (ppm) 5.82 (s, 1H, 4-*H*-Tp<sup>Me2</sup>), 5.81 (s, 1H, 4-*H*-Tp<sup>Me2</sup>), 5.79 (s, 1H, 4-*H*-Tp<sup>Me2</sup>), 5.76 (s, 1H, 4-*H*-Tp<sup>Me2</sup>), 5.68 (s, 1H, 4-*H*-Tp<sup>Me2</sup>), 5.57 (s, 1H, 4-*H*-Tp<sup>Me2</sup>), 3.62 (m, THF), 2.65 (s, 3H, CH<sub>3</sub>-Tp<sup>Me2</sup>), 2.51 (s, 3H, CH<sub>3</sub>-Tp<sup>Me2</sup>), 2.47 (s, 3H, CH<sub>3</sub>-Tp<sup>Me2</sup>), 2.41-2.40 (m, 18H, CH<sub>3</sub>-Tp<sup>Me2</sup>), 2.37 (s, 3H, CH<sub>3</sub>-Tp<sup>Me2</sup>), 2.28 (s, 3H, CH<sub>3</sub>-Tp<sup>Me2</sup>), 2.22 (s, 3H, CH<sub>3</sub>-Tp<sup>Me2</sup>), 1.94-1.81(m, 4H, SiCH<sub>2</sub>P), 1.77 (m, THF), 0.48 (s, 3H, Si(CH<sub>3</sub>)<sub>2</sub>), 0.45 (s, 3H, Si(CH<sub>3</sub>)<sub>2</sub>), 0.30 (s, 3H, Si(CH<sub>3</sub>)<sub>2</sub>), 0.24 (s, 3H, Si(CH<sub>3</sub>)<sub>2</sub>), 0.00 (s, 9H, Si(CH<sub>3</sub>)<sub>3</sub>), -0.50 (s, 9H, Si(CH<sub>3</sub>)<sub>3</sub>); <sup>13</sup>C{<sup>1</sup>H} NMR (100 MHz, THF-*d*<sub>8</sub>, 25 °C): δ (ppm) 152.67 (q, <sup>1</sup>J<sub>PC</sub> = 3.21 Hz, <sup>2</sup>J<sub>YC</sub> = 1.56 Hz, SCPS), 152.38 (Tp<sup>Me2</sup>), 152.22 (d, <sup>1</sup>J<sub>PC</sub> = 1.99 Hz, SCPS<sub>2</sub>), 151.70 (Tp<sup>Me2</sup>), 151.28 (Tp<sup>Me2</sup>), 150.69 (Tp<sup>Me2</sup>), 150.66 (Tp<sup>Me2</sup>), 150.08 (Tp<sup>Me2</sup>), 147.16 (Tp<sup>Me2</sup>), 146.76 (Tp<sup>Me2</sup>), 146.16 (Tp<sup>Me2</sup>), 145.42 (Tp<sup>Me2</sup>), 144.32 (Tp<sup>Me2</sup>), 106.82 (4-*C*-Tp<sup>Me2</sup>), 106.68 (4-*C*-Tp<sup>Me2</sup>), 106.58 (4-*C*-Tp<sup>Me2</sup>), 106.45 (4-*C*-Tp<sup>Me2</sup>), 106.37 (4-*C*-Tp<sup>Me2</sup>), 106.27 (4-*C*-Tp<sup>Me2</sup>), 68.02 (THF), 41.11 (d, <sup>1</sup>J<sub>PC</sub> = 44.71 Hz, SiCH<sub>2</sub>P), 32.69 (d, <sup>1</sup>J<sub>PC</sub> = 34.45 Hz, SiCH<sub>2</sub>P), 26.17 (THF), 16.52 (CH<sub>3</sub>-Tp<sup>Me2</sup>), 16.15 (CH<sub>3</sub>-Tp<sup>Me2</sup>), 15.58 (CH<sub>3</sub>-Tp<sup>Me2</sup>), 15.50 (CH<sub>3</sub>-Tp<sup>Me2</sup>), 14.49 (CH<sub>3</sub>-Tp<sup>Me2</sup>), 14.36 (CH<sub>3</sub>-Tp<sup>Me2</sup>), 13.18 (CH<sub>3</sub>-Tp<sup>Me2</sup>), 13.09 (CH<sub>3</sub>-Tp<sup>Me2</sup>), 13.04 (CH<sub>3</sub>-Tp<sup>Me2</sup>), 12.93 (CH<sub>3</sub>-Tp<sup>Me2</sup>), 12.85 (CH<sub>3</sub>-Tp<sup>Me2</sup>), 12.77 (CH<sub>3</sub>-Tp<sup>Me2</sup>), 9.27 (d, <sup>3</sup>J<sub>PC</sub> = 7.28 Hz, Si(CH<sub>3</sub>)<sub>2</sub>), 8.66 (d, <sup>3</sup>J<sub>PC</sub> = 11.6 Hz, Si(CH<sub>3</sub>)<sub>2</sub>), 6.41 (Si(CH<sub>3</sub>)<sub>2</sub>), 6.38 (Si(CH<sub>3</sub>)<sub>3</sub>), 6.25 (Si(CH<sub>3</sub>)<sub>2</sub>), 4.76 (Si(CH<sub>3</sub>)<sub>3</sub>); <sup>31</sup>P NMR (161 MHz, THF-*d*<sub>8</sub>, 25 °C): δ (ppm) 92.43 (q, <sup>1</sup>J<sub>YP</sub> = 17.6 Hz), 47.88 (s). Elemental Analysis: Calcd. (%) for C<sub>48</sub>H<sub>86</sub>N<sub>14</sub>B<sub>2</sub>OSi<sub>4</sub>P<sub>2</sub>S<sub>4</sub>Y<sub>2</sub>: C, 41.86; H, 6.29; N, 14.24. Found: C, 41.14; H, 6.16; N, 14.45.

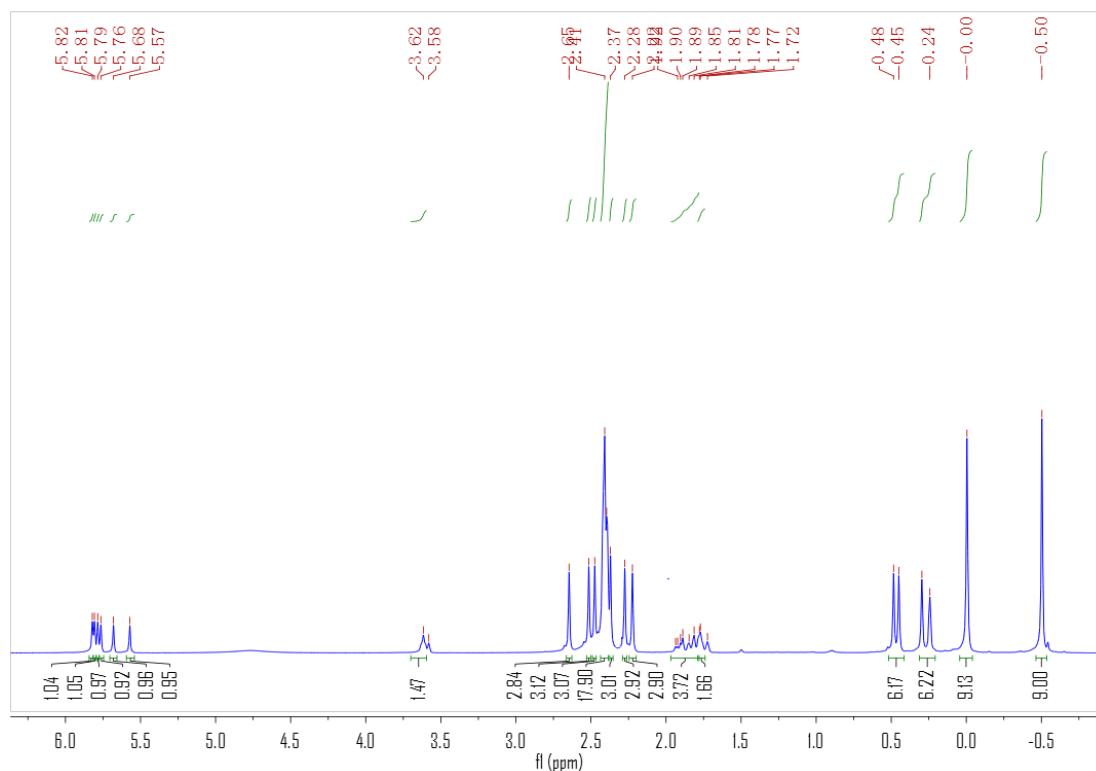

**Figure S6.** <sup>1</sup>H NMR spectrum of complex **3** in THF-*d*<sub>8</sub> at room temperature.

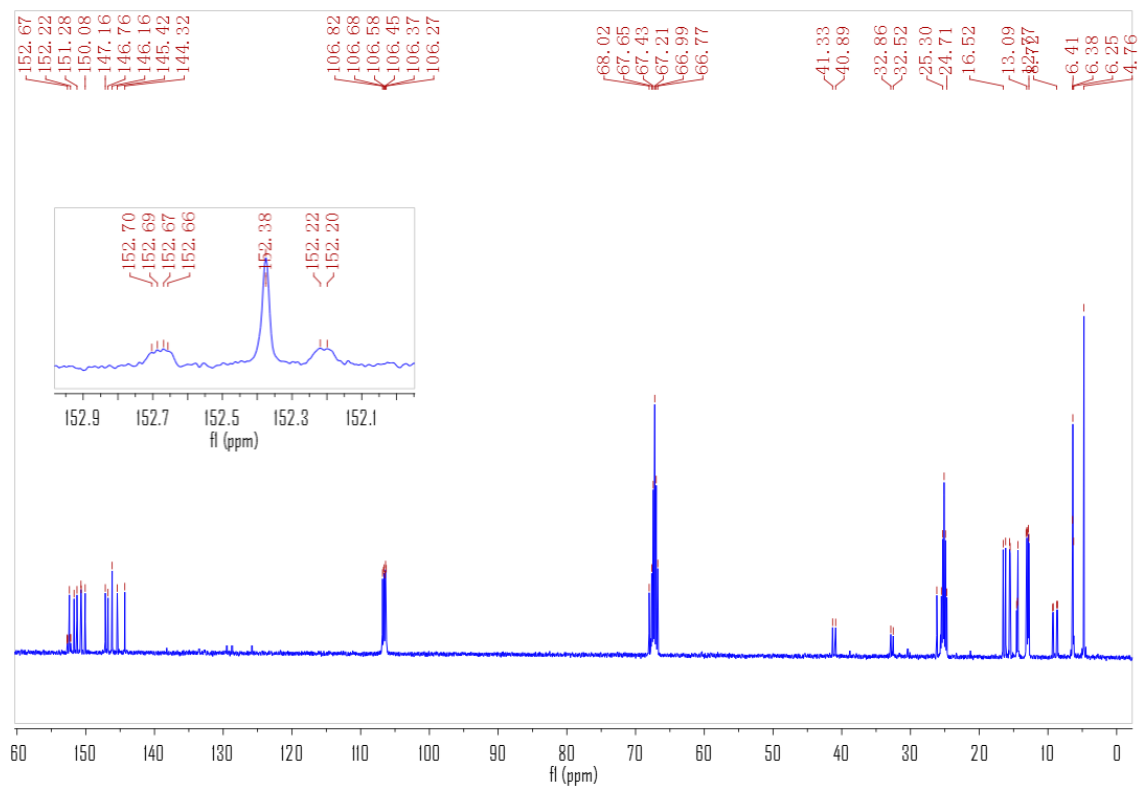

Figure S7.  $^{13}\text{C}\{^1\text{H}\}$  NMR spectrum of complex **3** in  $\text{THF-}d_8$  at room temperature.

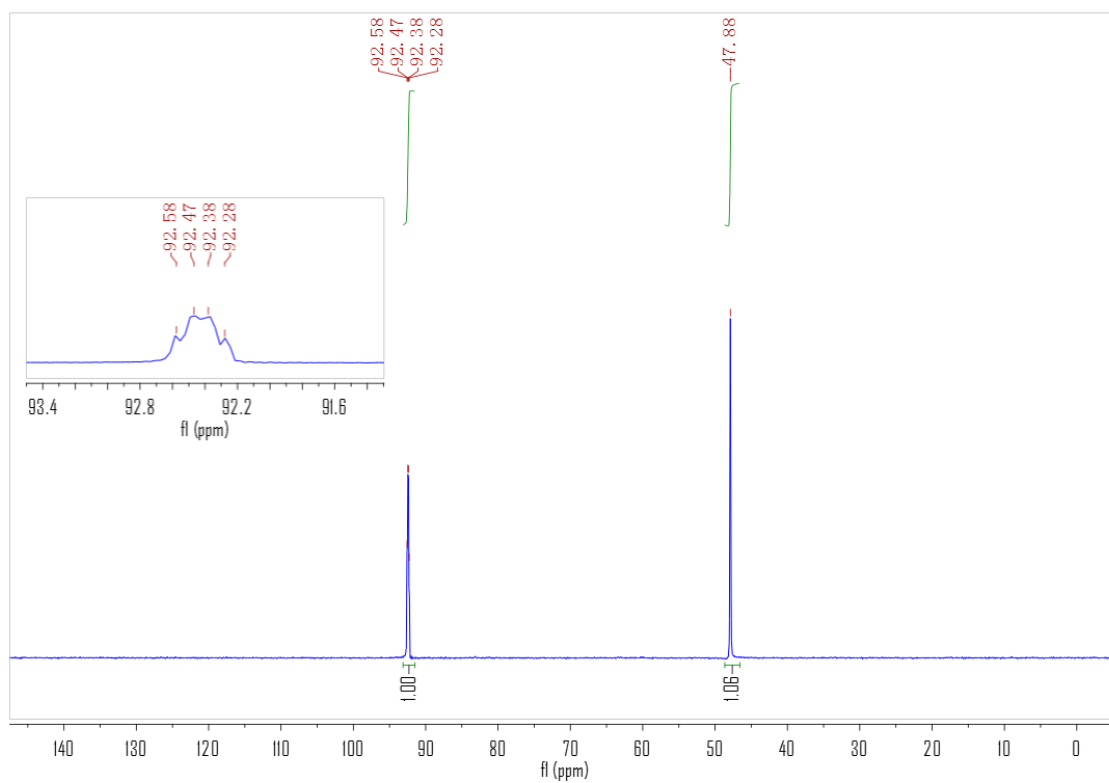

Figure S8.  $^{31}\text{P}$  NMR spectrum of complex **3** in  $\text{THF-}d_8$  at room temperature.

## 2.4 Synthesis and characterization of $(\text{Tp}^{\text{Me}_2})_2\text{Y}_2[\mu\text{-}\eta^3\text{-}\eta^2\text{-OC}(\text{PCH}_2\text{SiMe}_2\text{NSiMe}_3)_2](\text{THF})$ (**4**).

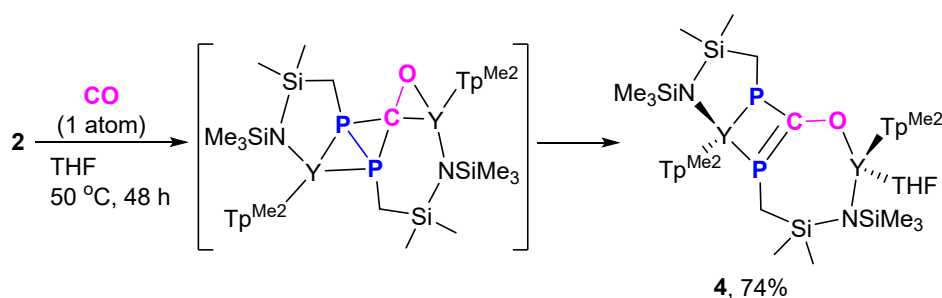

A THF solution (10 mL) of **2** (230 mg, 0.20 mmol) was degassed by freeze-pump-thaw and then exposed to excess 1.0 atm of CO. The reaction mixture gradually changed from yellow to orange. After stirring at 50 °C for two days, the solvent was removed under vacuum to give an orange solid. The residue was washed by hexane two times (5 mL $\times$ 2) and dried under vacuum, giving **4** as an orange powder (185 mg, 74% yield). The orange single crystals of **4** for X-ray diffraction analysis were obtained by solvent evaporation of concentrated toluene solution (ca 2 mL) of **4**.  $^1\text{H}$  NMR (400 MHz, toluene- $d_8$ , 25 °C):  $\delta$  (ppm) 5.61 (s, 2H, 4-*H*-Tp<sup>Me</sup><sub>2</sub>), 5.57 (s, 1H, 4-*H*-Tp<sup>Me</sup><sub>2</sub>), 5.50 (s, 2H, 4-*H*-Tp<sup>Me</sup><sub>2</sub>), 5.46 (s, 1H, 4-*H*-Tp<sup>Me</sup><sub>2</sub>), 3.67 (s, 4H, THF), 3.01 (s, 3H, CH<sub>3</sub>-Tp<sup>Me</sup><sub>2</sub>), 2.93 (s, 3H, CH<sub>3</sub>-Tp<sup>Me</sup><sub>2</sub>), 2.75 (s, 3H, CH<sub>3</sub>-Tp<sup>Me</sup><sub>2</sub>), 2.64 (s, 3H, CH<sub>3</sub>-Tp<sup>Me</sup><sub>2</sub>), 2.51 (s, 3H, CH<sub>3</sub>-Tp<sup>Me</sup><sub>2</sub>), 2.43 (s, 3H, CH<sub>3</sub>-Tp<sup>Me</sup><sub>2</sub>), 2.15-2.21 (m, 15H, CH<sub>3</sub>-Tp<sup>Me</sup><sub>2</sub>), 2.06 (s, 3H, CH<sub>3</sub>-Tp<sup>Me</sup><sub>2</sub>), 1.29-1.37 (m, 2H, SiCH<sub>2</sub>P), 1.33 (s, 4H, THF), 1.08-1.22 (m, 4H, SiCH<sub>2</sub>P), 0.66 (s, 3H, Si(CH<sub>3</sub>)<sub>2</sub>), 0.49 (s, 3H, Si(CH<sub>3</sub>)<sub>2</sub>), 0.41 (s, 6H, Si(CH<sub>3</sub>)<sub>2</sub>), -0.18 (s, 9H, Si(CH<sub>3</sub>)<sub>3</sub>), -0.22 (s, 9H, Si(CH<sub>3</sub>)<sub>3</sub>);  $^{31}\text{P}$  NMR (161 MHz, toluene- $d_8$ , 25 °C):  $\delta$  (ppm) 65.01 (d,  $^1J_{\text{YP}}=136.4$  Hz), -11.89 (d,  $^1J_{\text{YP}}=120.3$  Hz).  $^1\text{H}$  NMR (400 MHz, C<sub>6</sub>D<sub>6</sub>, 25 °C):  $\delta$  (ppm) 5.64 (s, 3H, 4-*H*-Tp<sup>Me</sup><sub>2</sub>), 5.53 (s, 2H, 4-*H*-Tp<sup>Me</sup><sub>2</sub>), 5.46 (s, 1H, 4-*H*-Tp<sup>Me</sup><sub>2</sub>), 3.78 (m, 4H, THF), 3.15 (s, 3H, CH<sub>3</sub>-Tp<sup>Me</sup><sub>2</sub>), 2.96 (s, 3H, CH<sub>3</sub>-Tp<sup>Me</sup><sub>2</sub>), 2.81 (s, 3H, CH<sub>3</sub>-Tp<sup>Me</sup><sub>2</sub>), 2.67 (s, 3H, CH<sub>3</sub>-Tp<sup>Me</sup><sub>2</sub>), 2.56 (s, 3H, CH<sub>3</sub>-Tp<sup>Me</sup><sub>2</sub>), 2.49 (s, 3H, CH<sub>3</sub>-Tp<sup>Me</sup><sub>2</sub>), 2.11-2.21 (m, 15H, CH<sub>3</sub>-Tp<sup>Me</sup><sub>2</sub>), 2.05 (s, 3H, CH<sub>3</sub>-Tp<sup>Me</sup><sub>2</sub>), 1.29-1.37 (m, 2H, SiCH<sub>2</sub>P), 1.17 (m, 2+4H, SiCH<sub>2</sub>P+THF), 0.74 (s, 3H, Si(CH<sub>3</sub>)<sub>2</sub>), 0.57 (s, 3H, Si(CH<sub>3</sub>)<sub>2</sub>), 0.45 (s, 6H, Si(CH<sub>3</sub>)<sub>2</sub>), -0.09 (s, 9H, Si(CH<sub>3</sub>)<sub>3</sub>), -0.13 (s, 9H, Si(CH<sub>3</sub>)<sub>3</sub>);  $^{13}\text{C}$  NMR (100 MHz, C<sub>6</sub>D<sub>6</sub>, 25 °C):  $\delta$  (ppm) 151.55 (CO), 151.42 (Tp<sup>Me</sup><sub>2</sub>), 150.31 (Tp<sup>Me</sup><sub>2</sub>), 150.22 (Tp<sup>Me</sup><sub>2</sub>), 150.10 (Tp<sup>Me</sup><sub>2</sub>), 149.65 (Tp<sup>Me</sup><sub>2</sub>), 146.79 (Tp<sup>Me</sup><sub>2</sub>), 146.24 (Tp<sup>Me</sup><sub>2</sub>), 145.79 (Tp<sup>Me</sup><sub>2</sub>), 144.71 (Tp<sup>Me</sup><sub>2</sub>), 144.54 (Tp<sup>Me</sup><sub>2</sub>), 106.64 (4-C-Tp<sup>Me</sup><sub>2</sub>), 106.40 (4-C-Tp<sup>Me</sup><sub>2</sub>), 106.09 (4-C-Tp<sup>Me</sup><sub>2</sub>), 105.86 (4-C-Tp<sup>Me</sup><sub>2</sub>), 72.51 (THF), 25.14 (THF), 19.72 (d,  $^1J_{\text{PC}}=49.66$  Hz, SiCH<sub>2</sub>P), 15.84 (d,  $^1J_{\text{PC}}=12.42$  Hz, SiCH<sub>2</sub>P), 15.47 (CH<sub>3</sub>-Tp<sup>Me</sup><sub>2</sub>), 15.33 (CH<sub>3</sub>-Tp<sup>Me</sup><sub>2</sub>), 15.25 (CH<sub>3</sub>-Tp<sup>Me</sup><sub>2</sub>), 15.07 (CH<sub>3</sub>-Tp<sup>Me</sup><sub>2</sub>), 14.84 (CH<sub>3</sub>-Tp<sup>Me</sup><sub>2</sub>), 14.71 (CH<sub>3</sub>-Tp<sup>Me</sup><sub>2</sub>), 14.62 (CH<sub>3</sub>-Tp<sup>Me</sup><sub>2</sub>), 13.21 (CH<sub>3</sub>-Tp<sup>Me</sup><sub>2</sub>), 13.04 (CH<sub>3</sub>-Tp<sup>Me</sup><sub>2</sub>), 12.98 (CH<sub>3</sub>-Tp<sup>Me</sup><sub>2</sub>), 9.00 (Si(CH<sub>3</sub>)<sub>2</sub>), 8.44 (s, Si(CH<sub>3</sub>)<sub>2</sub>), 8.24 (s, Si(CH<sub>3</sub>)<sub>2</sub>), 5.81 (Si(CH<sub>3</sub>)<sub>3</sub>), 4.80 (Si(CH<sub>3</sub>)<sub>3</sub>), 1.43 (Si(CH<sub>3</sub>)<sub>2</sub>);  $^{31}\text{P}$  NMR (161 MHz, C<sub>6</sub>D<sub>6</sub>, 25 °C):  $\delta$  (ppm) 66.56 (br s), -11.81 (br s); Elemental Analysis: Calcd. (%) for C<sub>47</sub>H<sub>86</sub>N<sub>14</sub>B<sub>2</sub>O<sub>2</sub>Si<sub>4</sub>P<sub>2</sub>Y<sub>2</sub>: C, 45.05; H, 6.92; N, 15.65. Found: C, 44.33; H, 6.77; N, 15.75.



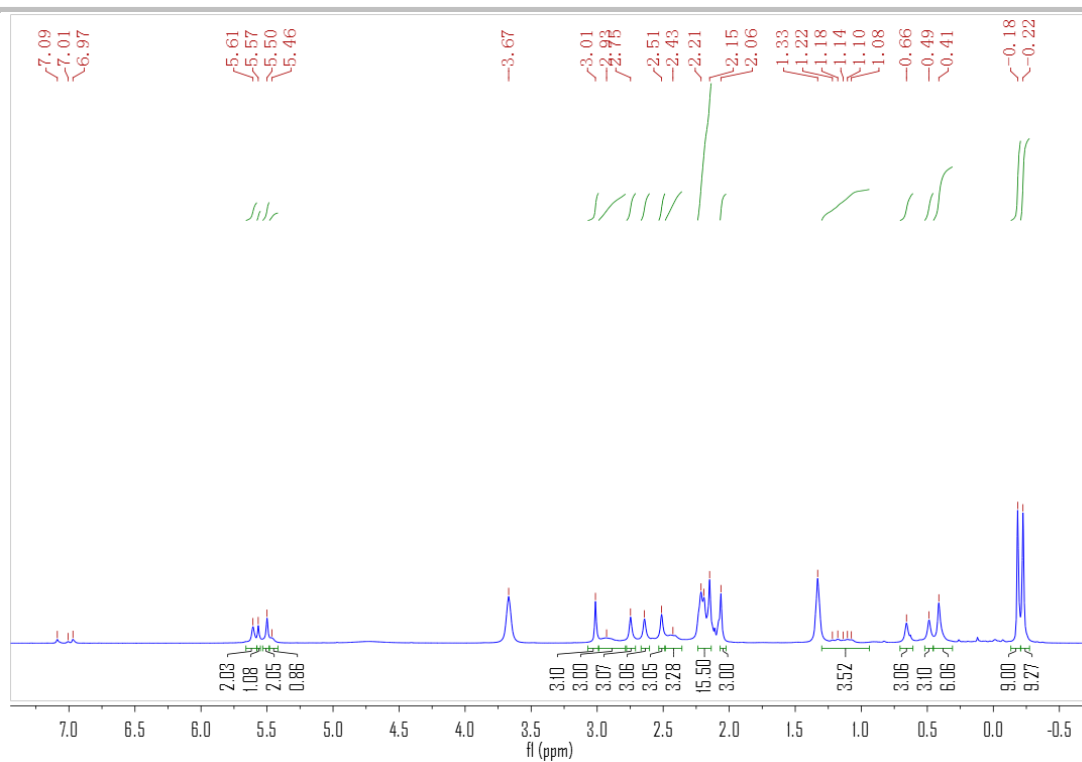

Figure S9.  $^1\text{H}$  NMR spectrum of **4** in Toluene- $d_8$  at room temperature.

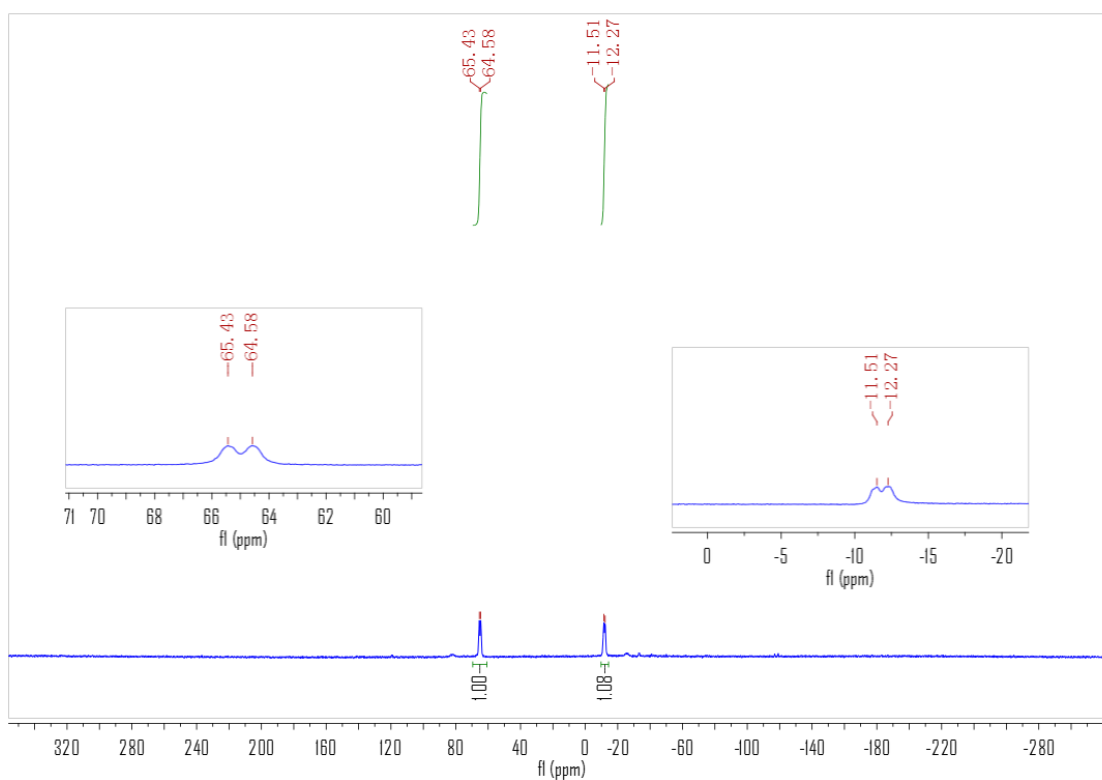

Figure S10.  $^{31}\text{P}$  NMR spectrum of **4** in toluene- $d_8$  at room temperature.

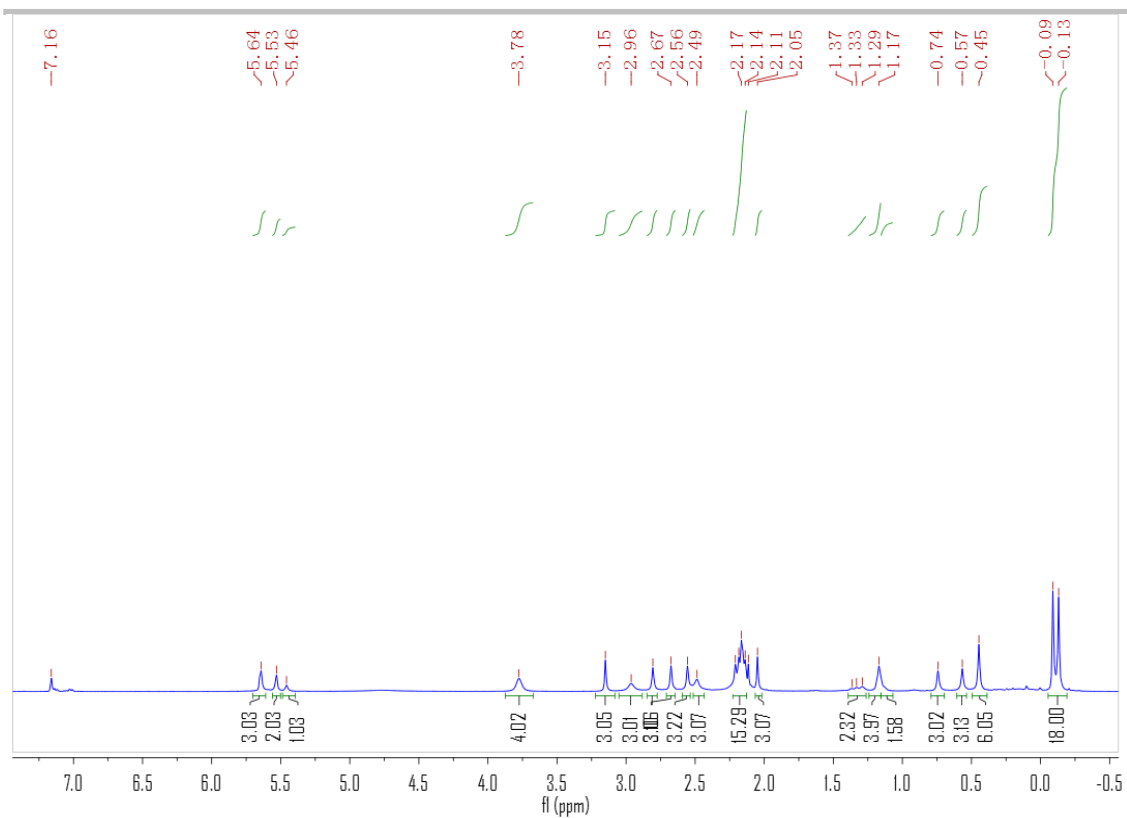

Figure S11.  $^1\text{H}$  NMR spectrum of **4** in  $\text{C}_6\text{D}_6$  at room temperature.

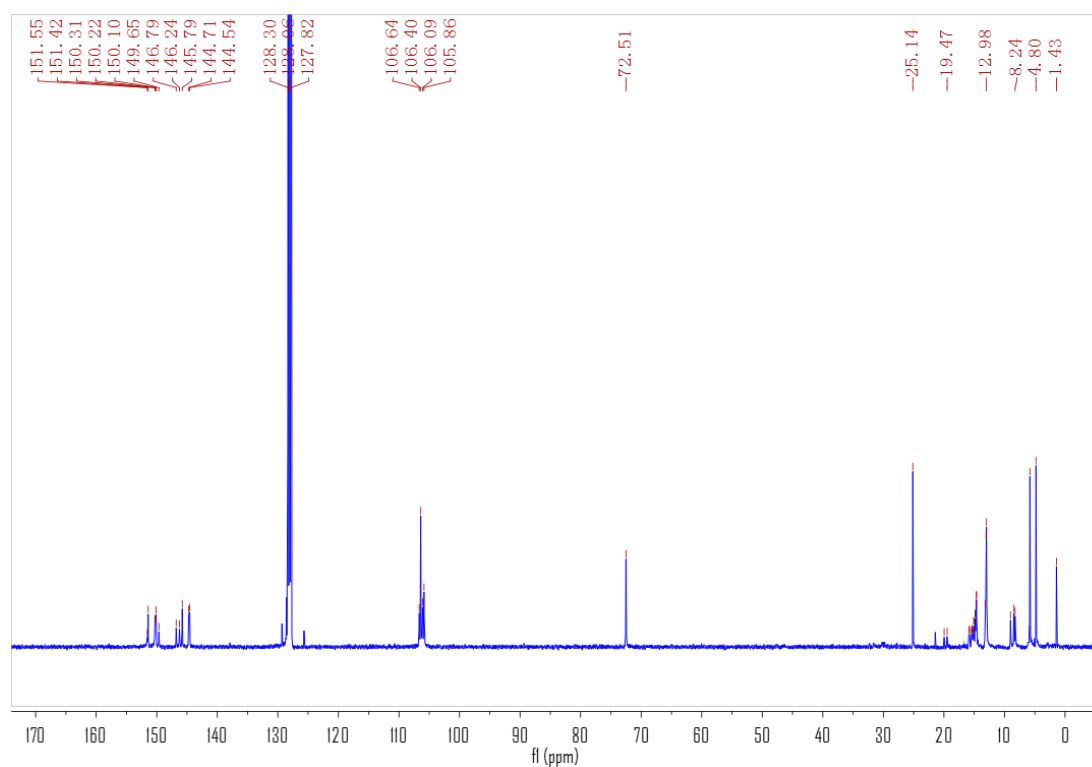

Figure S12.  $^{13}\text{C}\{^1\text{H}\}$  NMR spectrum of **4** in  $\text{C}_6\text{D}_6$  at room temperature.

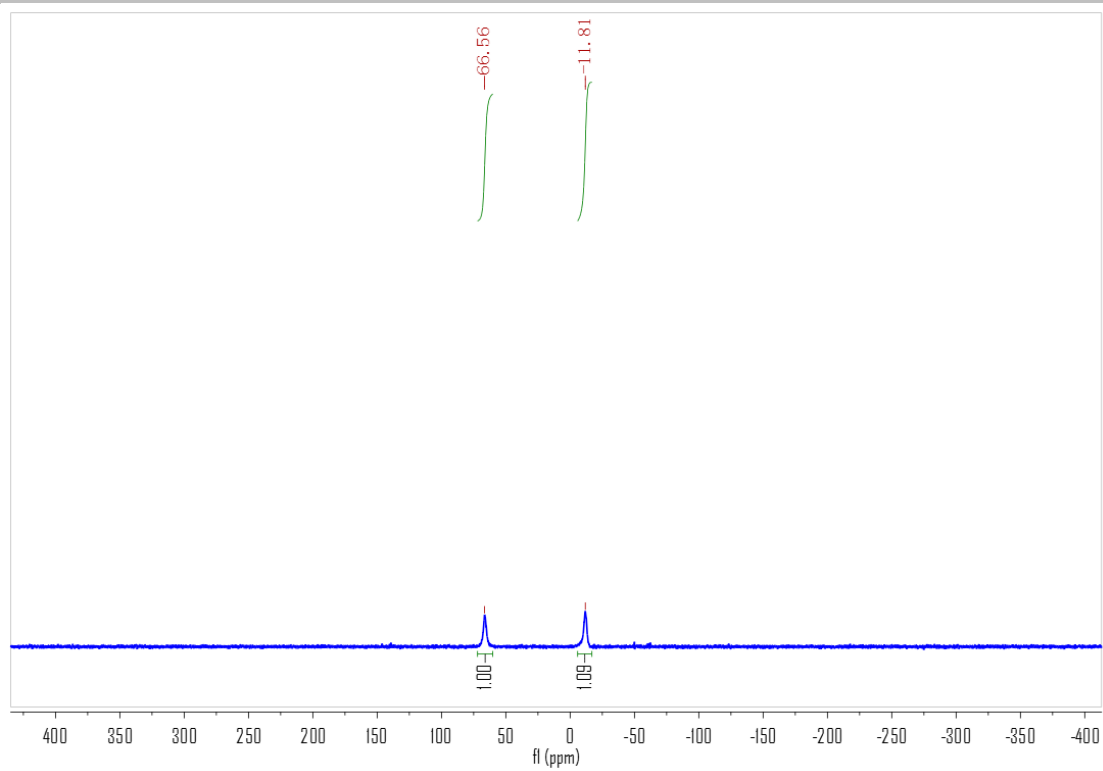

**Figure S13.**  $^{31}\text{P}$  NMR spectrum of **4** in  $\text{C}_6\text{D}_6$  at room temperature.

## 2.5 Synthesis and characterization of complex 5.

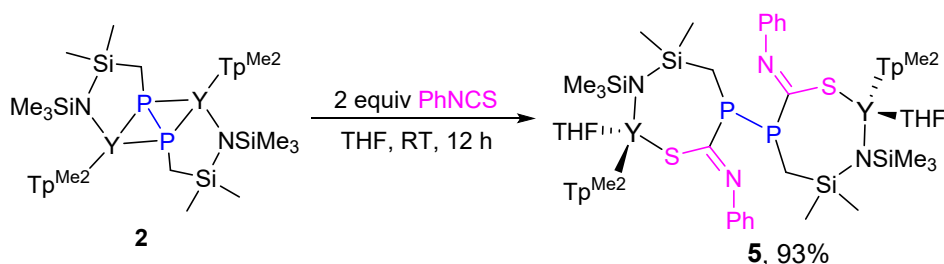

A cooled THF solution (3 mL) of PhNCS (27.5 mg, 0.20 mmol) was added slowly to a stirred THF solution (10 mL) of **2** (115.2 mg, 0.10 mmol) at ambient temperature. After stirring for 5 min, the reaction solution was stood at room temperature for 2 days to give **5** as colorless crystals (145 mg, 93% yield). Regrettably, the low solubility of **5** precluded the acquisition of its NMR spectra. Elemental Analysis: Calcd. (%) for  $C_{64}H_{102}N_{16}B_2O_2Si_4P_2S_2Y_2$ : C, 49.10; H, 6.57; N, 14.32. Found: C, 49.74; H, 6.52; N, 14.59.

## 2.6 Synthesis and characterization of diphosphine complexes 6 and 7.

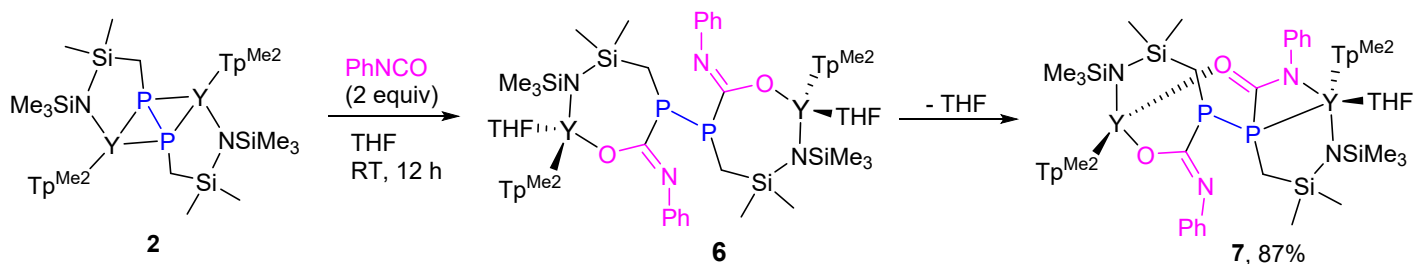

A cooled THF solution (5 mL) of PhNCO (47.6 mg, 0.40 mmol) was added slowly to a stirred THF solution (10 mL) of **2** (230 mg, 0.20 mmol) at ambient temperature. The reaction solution gradually changed from yellow to colorless. After stirring at ambient temperature for 12 h, the solution was concentrated to ca 3 mL under reduced pressure. After standing at room temperature for several days, colorless crystals of complex **6** were obtained (169 mg, 55% yield). However, if the reaction mixture was directly evaporated to dryness under vacuum, washing the residue with hexane three times (10 mL $\times$ 3) followed by crystallization in THF/hexane would lead to the loss of one coordinated THF, affording **7** as crystalline solid (267 mg, 87% yield). Crystals suitable to the X-ray diffraction analysis were obtained by gas phase diffusion of hexane into the THF solution of **7**. Notably, retransformation of **7** into **6** is quite difficult to perform in THF at room temperature, whereas transformation of compound **6** into compound **7** occurred slowly under vacuum condition or exposure to nitrogen gas too. For example, the  $^{31}P$  NMR monitoring data indicate the formation of a small amount of **7** after storing a solution of **6** in THF- $d_8$  at room temperature for 1 week (**Figure S14**). Therefore, compound **6** is not characterized by EA and NMR spectra. For compound **7**:  $^1H$  NMR (400 MHz, THF- $d_8$ , 25  $^\circ C$ ):  $\delta$  (ppm) 7.32 (d, 2H,  $^3J_{HH} = 7.72$  Hz, Ph), 7.03 (t, 2H,  $^3J_{HH} = 7.32$  Hz, Ph), 6.73 (t, 1H,  $^3J_{HH} = 7.2$  Hz, Ph), 6.27 (t, 1H,  $^3J_{HH} = 7.08$  Hz, Ph), 5.91 (m, 2H, Ph), 5.89 (s, 1H, 4-*H*-Tp $^{Me_2}$ ), 5.82 (s, 1H, 4-*H*-Tp $^{Me_2}$ ), 5.74 (s, 1H, 4-*H*-Tp $^{Me_2}$ ), 5.59 (m, 2H, Ph), 5.54 (s, 1H, 4-*H*-Tp $^{Me_2}$ ), 5.27 (s, 1H, 4-*H*-Tp $^{Me_2}$ ), 5.27 (s, 1H, 4-*H*-Tp $^{Me_2}$ ), 3.62 (m, 4H, THF), 2.57 (s, 6H, CH $_3$ -Tp $^{Me_2}$ ), 2.49 (s, 3H, CH $_3$ -Tp $^{Me_2}$ ), 2.45 (s, 3H, CH $_3$ -Tp $^{Me_2}$ ), 2.35 (s, 12H, CH $_3$ -Tp $^{Me_2}$ ), 2.31 (s, 3H, CH $_3$ -Tp $^{Me_2}$ ), 2.24 (s, 3H, CH $_3$ -Tp $^{Me_2}$ ), 2.04 (s, 3H, CH $_3$ -Tp $^{Me_2}$ ), 1.89-1.86 (m, 2H, SiCH $_2$ P), 1.77 (m, 4H, THF), 1.61-1.54 (m, 2H, SiCH $_2$ P), 1.47 (s, 3H, CH $_3$ -Tp $^{Me_2}$ ), 0.46 (s, 3H, Si(CH $_3$ ) $_2$ ), 0.44 (s, 3H, Si(CH $_3$ ) $_2$ ), 0.36 (s, 3H, Si(CH $_3$ ) $_2$ ), 0.21 (s, 3H, Si(CH $_3$ ) $_2$ ), -0.45 (s, 9H, Si(CH $_3$ ) $_3$ ), -0.67 (s, 9H, Si(CH $_3$ ) $_3$ );  $^{13}C\{^1H\}$  NMR (100 MHz, THF- $d_8$ , 25  $^\circ C$ ):  $\delta$  (ppm) 181.61 (t,  $^1J_{PC} = 5.0$  Hz, PC=O), 165.83 (q,  $^1J_{PC} = 3.0$  Hz, PC=N), 151.38 (Tp $^{Me_2}$ ), 150.44 (Tp $^{Me_2}$ ), 150.42 (Tp $^{Me_2}$ ), 149.96 (Tp $^{Me_2}$ ), 149.69 (Tp $^{Me_2}$ ), 149.54 (Tp $^{Me_2}$ ), 146.34 (Tp $^{Me_2}$ ), 146.04 (Tp $^{Me_2}$ ), 144.88 (Tp $^{Me_2}$ ), 144.49 (Tp $^{Me_2}$ ), 128.11 (Ph), 127.44 (Ph), 126.72 (Ph), 125.34 (Ph), 124.84 (Ph), 123.61 (Ph), 122.27 (Ph), 121.01 (Ph), 106.71 (4-*C*-Tp $^{Me_2}$ ), 106.48 (4-*C*-Tp $^{Me_2}$ ), 106.24 (4-*C*-Tp $^{Me_2}$ ), 105.82 (4-*C*-Tp $^{Me_2}$ ), 105.20 (4-*C*-Tp $^{Me_2}$ ), 104.74 (4-*C*-Tp $^{Me_2}$ ), 68.02 (THF), 26.16 (THF), 15.43 (CH $_3$ -Tp $^{Me_2}$ ), 15.39 (CH $_3$ -Tp $^{Me_2}$ ), 15.06 (CH $_3$ -Tp $^{Me_2}$ ), 14.96 (CH $_3$ -Tp $^{Me_2}$ ),

14.33 (CH<sub>3</sub>-Tp<sup>Me2</sup>), 14.13 (CH<sub>3</sub>-Tp<sup>Me2</sup>), 14.06 (d, <sup>1</sup>J<sub>PC</sub> = 27.45 Hz, SiCH<sub>2</sub>P), 13.06 (d, <sup>1</sup>J<sub>PC</sub> = 4.23 Hz, SiCH<sub>2</sub>P), 12.93 (CH<sub>3</sub>-Tp<sup>Me2</sup>), 12.91 (CH<sub>3</sub>-Tp<sup>Me2</sup>), 12.87 (CH<sub>3</sub>-Tp<sup>Me2</sup>), 12.69 (CH<sub>3</sub>-Tp<sup>Me2</sup>), 9.64 (d, <sup>3</sup>J<sub>PC</sub> = 5.09 Hz, Si(CH<sub>3</sub>)<sub>2</sub>), 7.59 (d, <sup>3</sup>J<sub>PC</sub> = 10.91 Hz, Si(CH<sub>3</sub>)<sub>2</sub>), 6.31 (Si(CH<sub>3</sub>)<sub>3</sub>), 6.17 (Si(CH<sub>3</sub>)<sub>2</sub>), 4.68 (Si(CH<sub>3</sub>)<sub>3</sub>), 3.81 (d, <sup>3</sup>J<sub>PC</sub> = 4.28 Hz, Si(CH<sub>3</sub>)<sub>2</sub>); <sup>31</sup>P NMR (161 MHz, THF-*d*<sub>8</sub>, 25 °C): δ (ppm) -26.71 (dm, <sup>1</sup>J<sub>PP</sub> = 374 Hz, PY), -39.64 (dd, <sup>1</sup>J<sub>PP</sub> = 374, 12.8 Hz, free P). Elemental Analysis: Calcd. (%) for C<sub>60</sub>H<sub>94</sub>N<sub>16</sub>B<sub>2</sub>O<sub>3</sub>Si<sub>4</sub>P<sub>2</sub>Y<sub>2</sub>: C, 49.32; H, 6.48; N, 15.34. Found: C, 49.59; H, 6.34; N, 15.57.

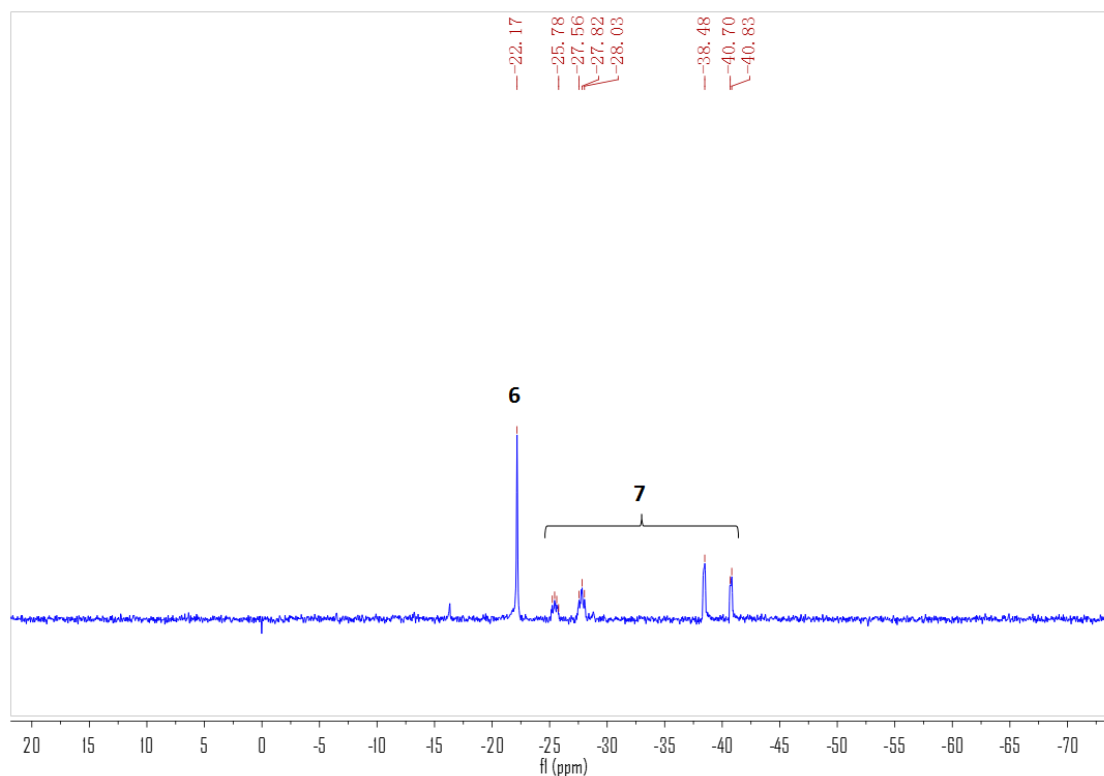

Figure S14. <sup>31</sup>P NMR spectrum of **6** after storing in THF-*d*<sub>8</sub> at room temperature for 1 week.

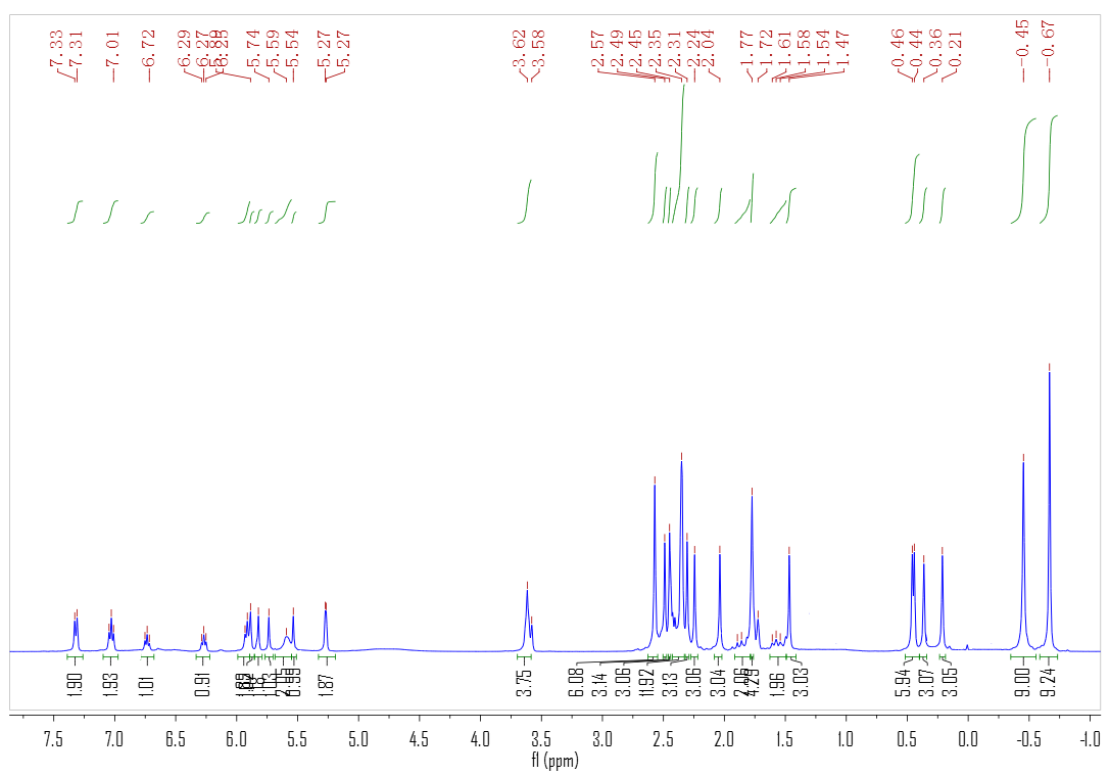

Figure S15.  $^1\text{H}$  NMR spectrum of **7** in  $\text{THF-}d_8$  at room temperature.

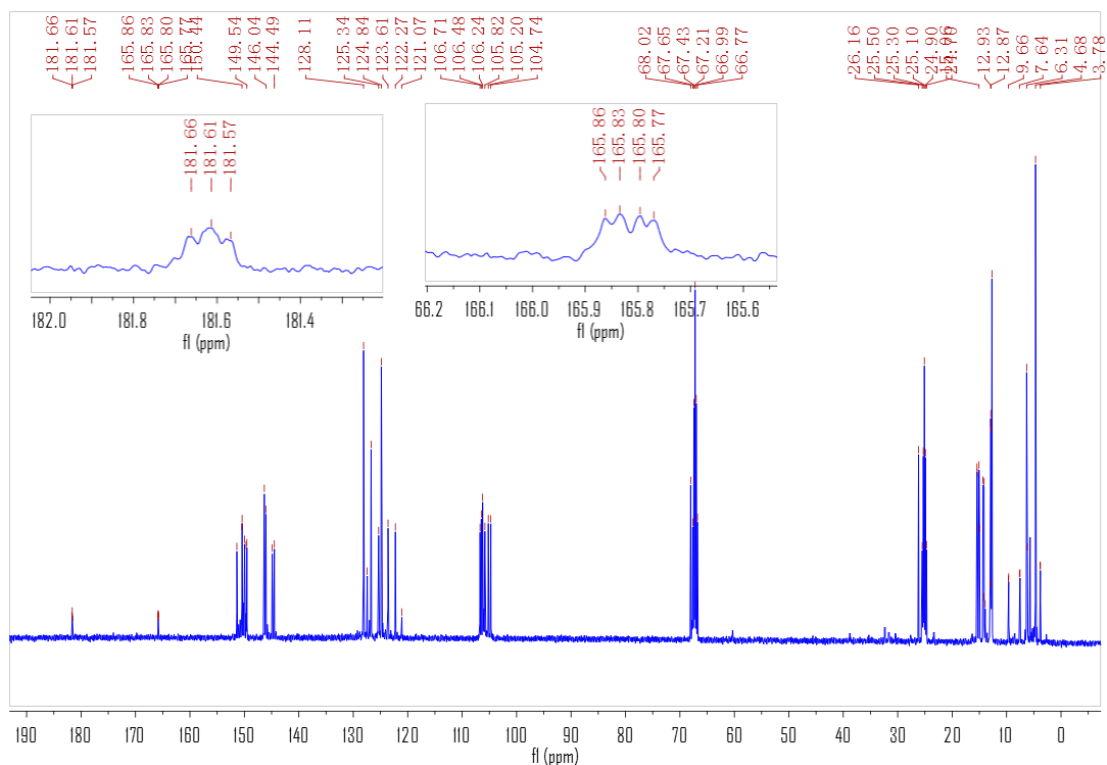

Figure S16.  $^{13}\text{C}\{^1\text{H}\}$  NMR spectrum of compound **7** in  $\text{THF-}d_8$  at room temperature.

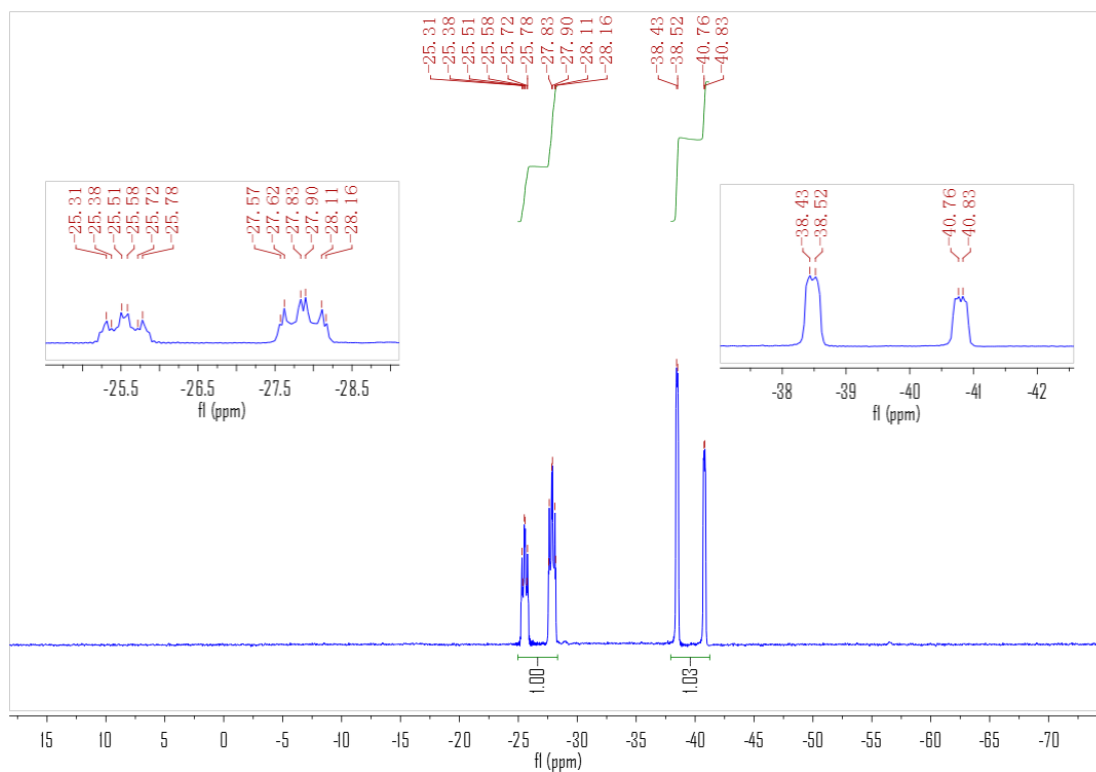

Figure S17.  $^{31}\text{P}$  NMR spectrum of compound **7** in  $\text{THF-}d_8$  at room temperature.

## 2.7 Synthesis and characterization of complex **8**.

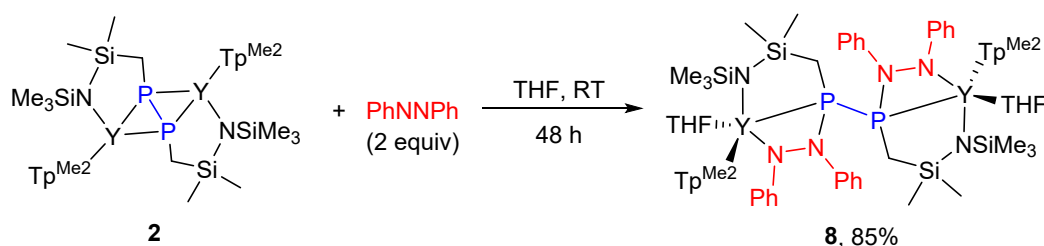

A THF solution (5 mL) of PhNNPh (39.6 mg, 0.20 mmol) was added slowly to a stirred THF solution (10 mL) of **2** (115 mg, 0.10 mmol) at ambient temperature. The color of the reaction mixture gradually changed from yellow to greenish black. After stirring for 2 days, the solvent was removed under vacuum and the solid residue was washed by n-hexane two times (5 mL $\times$ 2) and dried under vacuum to give a yellow powder of **8** (141 mg, 85% yield). Yellow crystals suitable for X-ray diffraction analysis were obtained by solvent evaporation of concentrated THF solution (ca 2 mL) of **8**. No satisfied  $^{13}\text{C}$  NMR data of **8** was obtained due to its poor solubility.  $^1\text{H}$  NMR (400 MHz, THF- $d_8$ , 25  $^\circ\text{C}$ ):  $\delta$  (ppm) 7.31 (d, 4H,  $^3J_{\text{HH}} = 7.92$  Hz,  $-\text{C}_6\text{H}_5$ ), 6.97 (t,  $^3J_{\text{HH}} = 7.88$  Hz, 6H,  $-\text{C}_6\text{H}_5$ ), 6.70 (br, 2H,  $-\text{C}_6\text{H}_5$ ), 6.63 (t,  $^3J_{\text{HH}} = 7.12$  Hz, 2H,  $-\text{C}_6\text{H}_5$ ), 6.30 (br, 2H,  $-\text{C}_6\text{H}_5$ ), 6.13 (t,  $^3J_{\text{HH}} = 6.4$  Hz, 4H,  $-\text{C}_6\text{H}_5$ ), 5.87 (s, 2H, 4-*H*-Tp $^{\text{Me}_2}$ ), 5.82 (s, 2H, 4-*H*-Tp $^{\text{Me}_2}$ ), 5.60 (s, 2H, 4-*H*-Tp $^{\text{Me}_2}$ ), 3.60 (m, 4H, THF), 2.64 (s, 6H,  $\text{CH}_3\text{-Tp}^{\text{Me}_2}$ ), 2.52 (s, 6H,  $\text{CH}_3\text{-Tp}^{\text{Me}_2}$ ), 2.48 (s, 6H,  $\text{CH}_3\text{-Tp}^{\text{Me}_2}$ ), 2.46 (s, 6H,  $\text{CH}_3\text{-Tp}^{\text{Me}_2}$ ), 2.45 (s, 6H,  $\text{CH}_3\text{-Tp}^{\text{Me}_2}$ ), 2.39-2.41 (m, 4H,  $\text{SiCH}_2\text{P}$ ), 2.11 (s, 6H,  $\text{CH}_3\text{-Tp}^{\text{Me}_2}$ ), 1.77 (m, 4H, THF), 0.14 (s, 6H,  $\text{Si}(\text{CH}_3)_2$ ), -0.38 (s, 18H,  $\text{Si}(\text{CH}_3)_3$ ), -0.56 (s, 6H,  $\text{Si}(\text{CH}_3)_2$ );  $^{31}\text{P}$  NMR (161 MHz, THF- $d_8$ , 25  $^\circ\text{C}$ ):  $\delta$  (ppm) 50.66 (s); Elemental Analysis: Calcd. (%) for  $\text{C}_{74}\text{H}_{112}\text{N}_{18}\text{B}_2\text{O}_2\text{Si}_4\text{P}_2\text{Y}_2$ : C, 53.56; H, 6.80; N, 15.19. Found: C, 53.27; H, 6.73; N, 15.27.

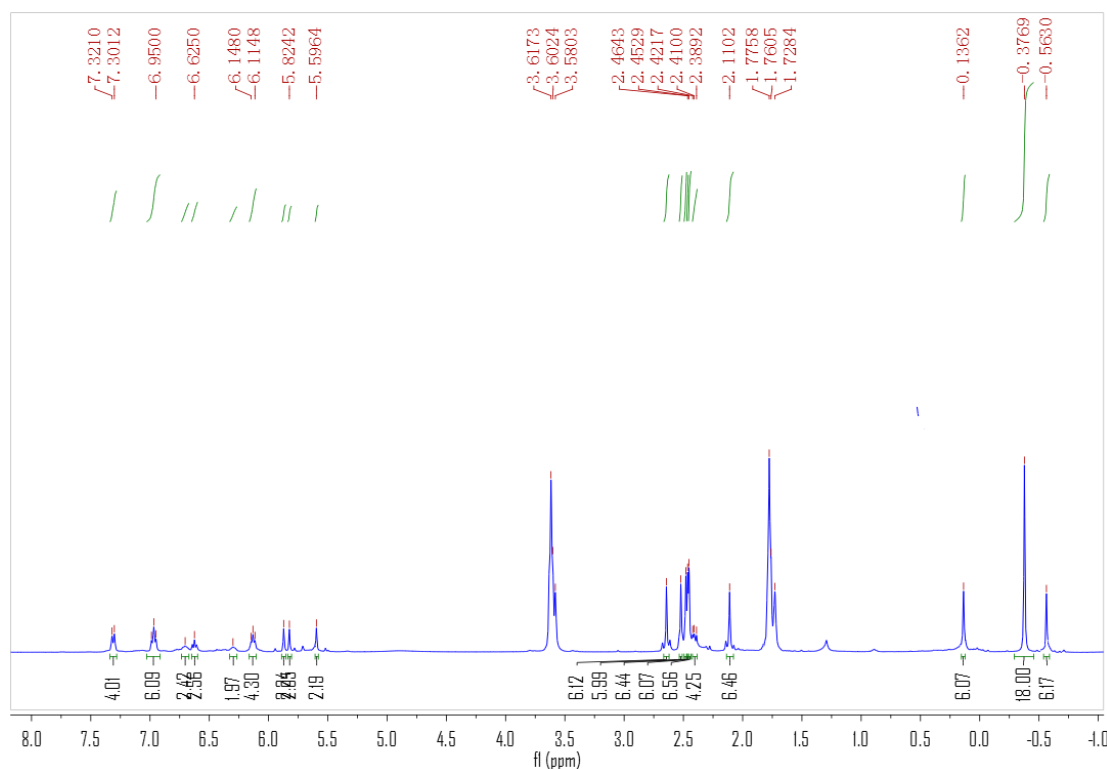

**Figure S18.**  $^1\text{H}$  NMR spectrum of **8** in THF- $d_8$  at room temperature.

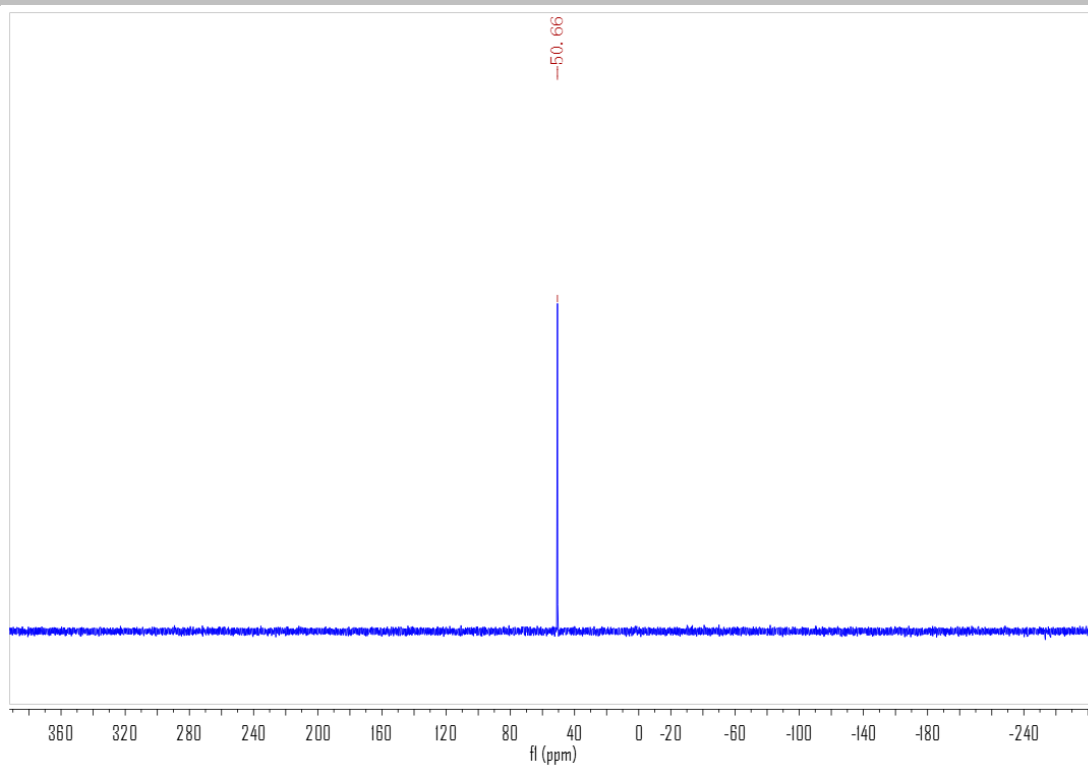

**Figure S19.**  $^{31}\text{P}$  NMR spectrum of **8** in  $\text{THF-}d_8$  at room temperature.



## 2.8 Synthesis and characterization of complex 9.

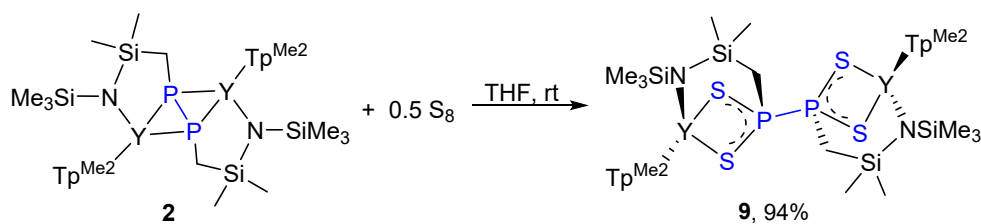

A THF solution (5 mL) of  $S_8$  (12.8 mg, 0.050 mmol) was added slowly to a stirred THF solution (10 mL) of **2** (115 mg, 0.10 mmol) at ambient temperature. After stirring for 5 min, the reaction solution was stood at room temperature for three days to give **9** as colorless crystals (120 mg, 94% yield). No satisfied NMR data of **9** was obtained due to its poor solubility even in heating THF- $d_8$ . Elemental Analysis: Calcd. (%) for  $C_{42}H_{78}N_{14}B_2S_4Si_4P_2Y_2$ : C, 39.37; H, 6.14; N, 15.31. Found: C, 38.53; H, 6.03; N, 15.26.

## 2.10 Synthesis and characterization of complex 10.

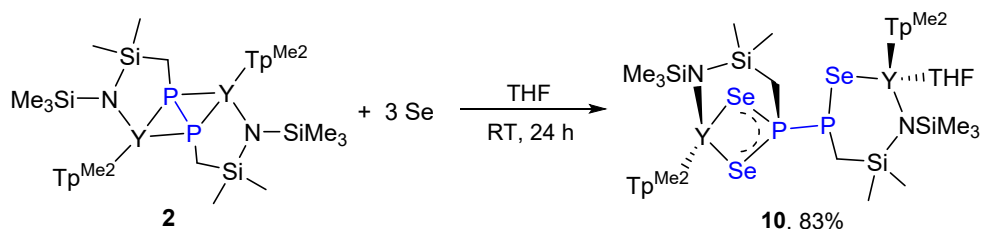

Se powder (23.7 mg, 0.30 mmol) was added to a stirred THF solution (10 mL) of **2** (230 mg, 0.20 mmol) at ambient temperature. The mixture gradually changed from greenish black to colorless. After stirring for overnight, removing solvent gave colorless solid, which was washed by hexane two times (10 mL $\times$ 2) and dried under vacuum to give **10** as a colorless powder (243 mg, 83% yield). Colorless crystals for X-ray diffraction analysis were obtained by gas-phase diffusing hexane into a concentrated THF solution (ca 2 mL) of **10**.  $^1H$  NMR (400 MHz, THF- $d_8$ , 25  $^\circ C$ ):  $\delta$  (ppm) 5.86 (s, 1H, 4-*H*-Tp<sup>Me2</sup>), 5.83 (s, 3H, 4-*H*-Tp<sup>Me2</sup>), 5.71 (s, 1H, 4-*H*-Tp<sup>Me2</sup>), 5.60 (s, 1H, 4-*H*-Tp<sup>Me2</sup>), 3.61 (m, 4H, THF), 2.75 (s, 3H, CH<sub>3</sub>-Tp<sup>Me2</sup>), 2.63 (s, 6H, CH<sub>3</sub>-Tp<sup>Me2</sup>), 2.60 (s, 3H, CH<sub>3</sub>-Tp<sup>Me2</sup>), 2.50 (s, 3H, CH<sub>3</sub>-Tp<sup>Me2</sup>), 2.44 (s, 12H, CH<sub>3</sub>-Tp<sup>Me2</sup>), 2.42 (s, 3H, CH<sub>3</sub>-Tp<sup>Me2</sup>), 2.34 (s, 3H, CH<sub>3</sub>-Tp<sup>Me2</sup>), 2.30 (s, 3H, CH<sub>3</sub>-Tp<sup>Me2</sup>), 2.12-2.27 (m, 4H, SiCH<sub>2</sub>P), 1.77 (m, 4H, THF), 1.47 (s, 3H, CH<sub>3</sub>-Tp<sup>Me2</sup>), 0.42 (s, 3H, Si(CH<sub>3</sub>)<sub>2</sub>), 0.32 (s, 3H, Si(CH<sub>3</sub>)<sub>2</sub>), 0.30 (s, 6H, Si(CH<sub>3</sub>)<sub>2</sub>), -0.40 (s, 9H, Si(CH<sub>3</sub>)<sub>3</sub>), -0.50 (s, 9H, Si(CH<sub>3</sub>)<sub>3</sub>);  $^{13}C$  NMR (100 MHz, THF- $d_8$ , 25  $^\circ C$ ):  $\delta$  (ppm) 151.65 (Tp<sup>Me2</sup>), 151.50 (Tp<sup>Me2</sup>), 151.35 (Tp<sup>Me2</sup>), 151.05 (Tp<sup>Me2</sup>), 150.95 (Tp<sup>Me2</sup>), 150.14 (Tp<sup>Me2</sup>), 147.03 (Tp<sup>Me2</sup>), 146.97 (Tp<sup>Me2</sup>), 146.95 (Tp<sup>Me2</sup>), 146.47 (Tp<sup>Me2</sup>), 145.60 (Tp<sup>Me2</sup>), 144.60 (Tp<sup>Me2</sup>), 106.90 (4-C-Tp<sup>Me2</sup>), 106.84 (4-C-Tp<sup>Me2</sup>), 106.73 (4-C-Tp<sup>Me2</sup>), 106.66 (4-C-Tp<sup>Me2</sup>), 106.17 (4-C-Tp<sup>Me2</sup>), 68.02 (THF), 34.68 (d,  $^1J_{PC}$  = 5.34 Hz, SiCH<sub>2</sub>P), 34.49 (d,  $^1J_{PC}$  = 5.87 Hz, SiCH<sub>2</sub>P), 26.16 (THF), 17.51 (CH<sub>3</sub>-Tp<sup>Me2</sup>), 17.28 (CH<sub>3</sub>-Tp<sup>Me2</sup>), 16.76 (CH<sub>3</sub>-Tp<sup>Me2</sup>), 15.59 (CH<sub>3</sub>-Tp<sup>Me2</sup>), 15.48 (CH<sub>3</sub>-Tp<sup>Me2</sup>), 14.77 (CH<sub>3</sub>-Tp<sup>Me2</sup>), 12.97 (CH<sub>3</sub>-Tp<sup>Me2</sup>), 12.89 (CH<sub>3</sub>-Tp<sup>Me2</sup>), 12.86 (CH<sub>3</sub>-Tp<sup>Me2</sup>), 7.54 (d,  $^3J_{PC}$  = 3.81 Hz, Si(CH<sub>3</sub>)<sub>2</sub>), 7.46 (overlap d, Si(CH<sub>3</sub>)<sub>2</sub>), 7.42 (d,  $^3J_{PC}$  = 3.65 Hz, Si(CH<sub>3</sub>)<sub>2</sub>), 6.80 (d,  $^3J_{PC}$  = 5.19 Hz, Si(CH<sub>3</sub>)<sub>2</sub>), 5.53 (Si(CH<sub>3</sub>)<sub>3</sub>), 4.98 (s, Si(CH<sub>3</sub>)<sub>3</sub>);  $^{31}P$  NMR (161 MHz, THF- $d_8$ , 25  $^\circ C$ ):  $\delta$  (ppm) 29.97 (d,  $^1J_{pp}$  = 390 Hz), 23.68 (d,  $^1J_{pp}$  = 390 Hz); Elemental Analysis: Calcd. (%) for  $C_{46}H_{86}N_{14}B_2OSe_3Si_4P_2Y_2$ : C, 37.79; H, 5.93; N, 13.41. Found: C, 37.53; H, 5.81; N, 13.29.

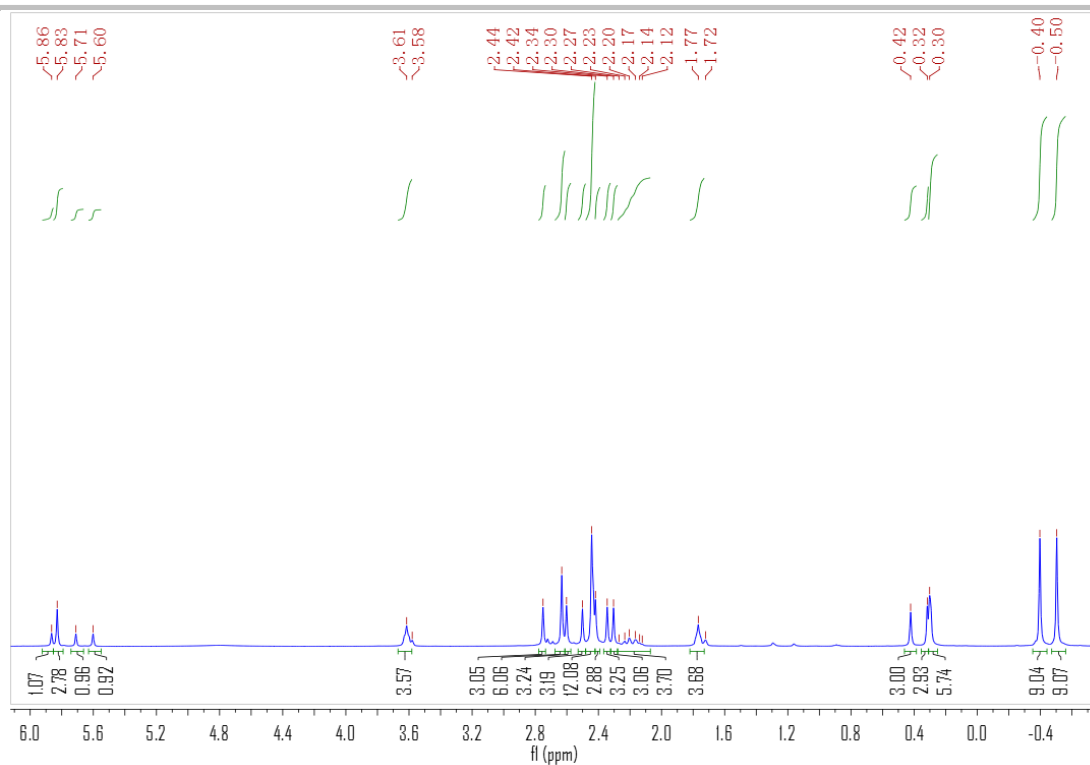

Figure S20.  $^1\text{H}$  NMR spectrum of compound **10** in  $\text{THF-}d_8$  at room temperature.

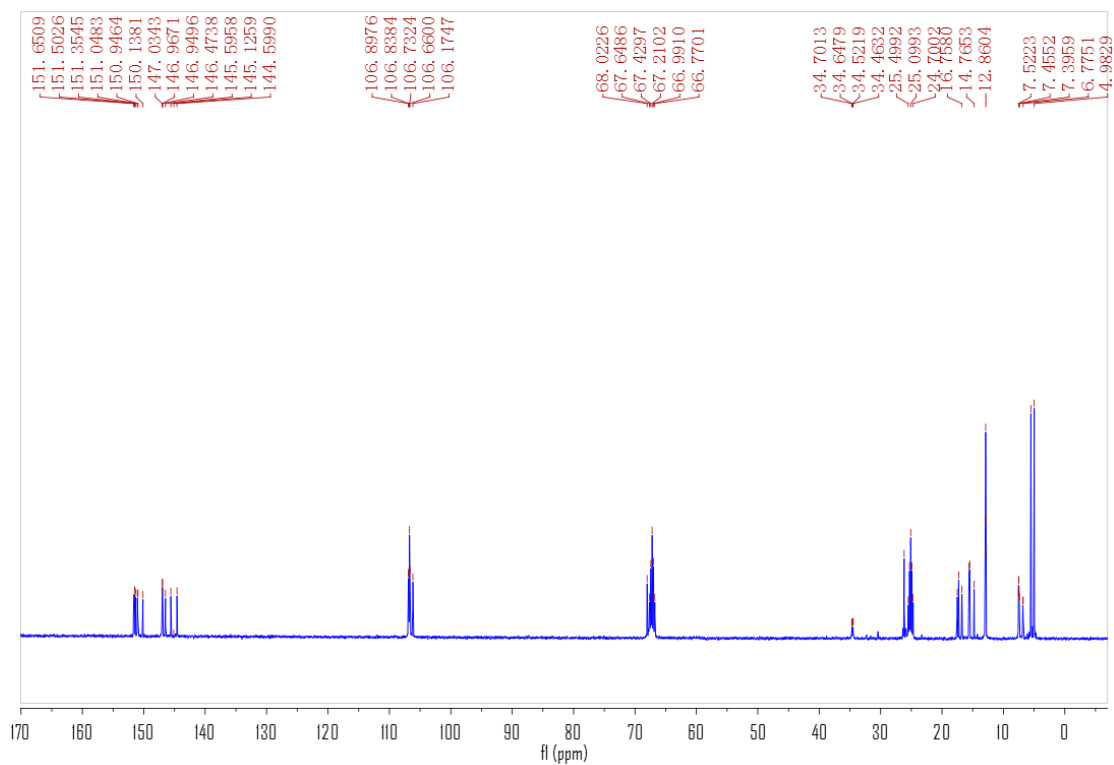

Figure S21.  $^{13}\text{C}\{^1\text{H}\}$  NMR spectrum of compound **10** in  $\text{THF-}d_8$  at room temperature.

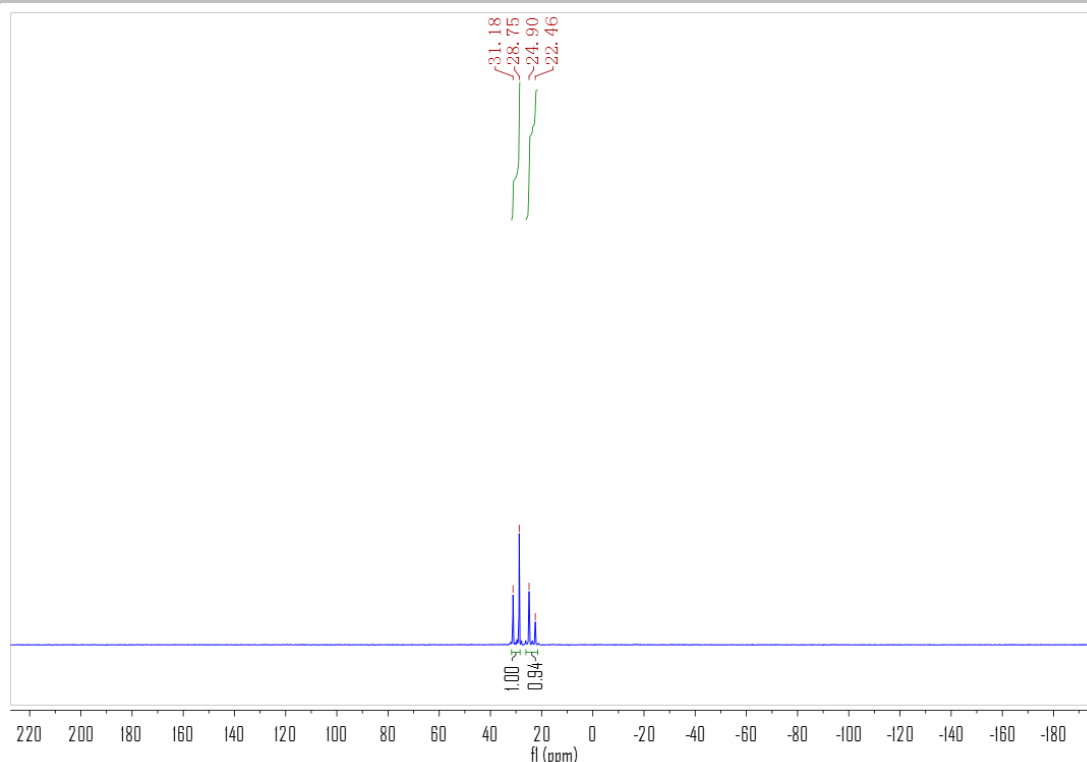

**Figure S22.**  $^{31}\text{P}$  NMR spectrum of compound **10** in  $\text{THF-}d_8$  at room temperature.

### 3. X-ray Crystallographic Analyses of Complexes 1-10

Suitable crystals were wrapped in mineral oil and then were frozen at 173 or 223 K. Data collections were performed on a Bruker SMART APEX (at 293 K) or Bruker SMART APEX (II) (at 173 or 293 K) diffractometer with CCD area detector using graphite-monochromated Mo  $K\alpha$  radiation ( $\lambda = 0.71073 \text{ \AA}$ ). The determination of crystal class and unit cell was carried out by SMART program package. The raw frame data were processed using SAINT<sup>3</sup> and SADABS<sup>4</sup> to yield the reflection data file. All structures were solved by using SHELXTL program<sup>5</sup> and refined on  $F_2$  by full-matrix least-squares techniques with anisotropic thermal parameters for non-hydrogen atoms. Hydrogen atoms were placed at the calculated positions and included in the structure calculation without further refinement of the parameters. The residual electron densities were of no chemical significance. Details of SQUEEZE are given in cif files. Calculations were carried out using the *SHELXL-2008* or *SHELXL-2014* program. Unfortunately, the precision of compounds **5** and **6** was limited by the poor quality of their crystals. CCDC 1879573 (**1**), 1879574 (**2**), 1879577 (**2-THF**), 1879583 (**3**), 1879582 (**4**), 1879576 (**5**), 1879581 (**6**), 1879575 (**7-0.5C<sub>6</sub>H<sub>14</sub>**), 1879580 (**8**), 1879579 (**9**), and 1879578 (**10**), contain the supplementary crystallographic data for this paper. These data can be obtained free of charge from The Cambridge Crystallographic Data Centre via [www.ccdc.cam.ac.uk/conts/retrieving.html](http://www.ccdc.cam.ac.uk/conts/retrieving.html) (or from The Cambridge Crystallographic Data Centre, 12, Union Road, Cambridge CB2 1EZ, UK; fax: (+44)-1223-336033; or [deposit@ccdc.cam.ac.uk](mailto:deposit@ccdc.cam.ac.uk)).

**Table S1.** Crystal data and collection parameters of complexes **1**, **2** and **2·THF**

| Identification code                                         | <b>1</b>                                                           | <b>2</b>                                                                                                     | <b>2·THF</b>                                                                                                                |
|-------------------------------------------------------------|--------------------------------------------------------------------|--------------------------------------------------------------------------------------------------------------|-----------------------------------------------------------------------------------------------------------------------------|
| Formula                                                     | C <sub>25</sub> H <sub>47</sub> BN <sub>7</sub> OSi <sub>2</sub> Y | C <sub>42</sub> H <sub>78</sub> B <sub>2</sub> N <sub>14</sub> P <sub>2</sub> Si <sub>4</sub> Y <sub>2</sub> | C <sub>50</sub> H <sub>94</sub> B <sub>2</sub> N <sub>14</sub> O <sub>2</sub> P <sub>2</sub> Si <sub>4</sub> Y <sub>2</sub> |
| Formula weight                                              | 617.59                                                             | 1152.92                                                                                                      | 1297.13                                                                                                                     |
| Temperature (K)                                             | 298(2)                                                             | 173(2)                                                                                                       | 173(2)                                                                                                                      |
| Wavelength (Å)                                              | 0.71073                                                            | 0.71073                                                                                                      | 0.71073                                                                                                                     |
| Crystal system                                              | Orthorhombic                                                       | Triclinic                                                                                                    | Monoclinic                                                                                                                  |
| Space group                                                 | <i>P</i> 2(1)2(1)2(1)                                              | <i>P</i> -1                                                                                                  | <i>C</i> 2/ <i>c</i>                                                                                                        |
| <i>a</i> (Å)                                                | 11.632(2)                                                          | 10.966(17)                                                                                                   | 34.357(4)                                                                                                                   |
| <i>b</i> (Å)                                                | 15.388(3)                                                          | 11.122(17)                                                                                                   | 13.674(18)                                                                                                                  |
| <i>c</i> (Å)                                                | 18.887(4)                                                          | 13.834(2)                                                                                                    | 16.179(2)                                                                                                                   |
| $\alpha$ (deg)                                              | 90                                                                 | 81.500(2)                                                                                                    | 90                                                                                                                          |
| $\beta$ (deg)                                               | 90                                                                 | 87.739(3)                                                                                                    | 106.458(2)                                                                                                                  |
| $\gamma$ (deg)                                              | 90                                                                 | 70.796(2)                                                                                                    | 90                                                                                                                          |
| <i>V</i> (Å <sup>3</sup> )                                  | 3380.7(12)                                                         | 4153.5(13)                                                                                                   | 7289.1(16)                                                                                                                  |
| <i>Z</i>                                                    | 4                                                                  | 1                                                                                                            | 4                                                                                                                           |
| D <sub>c</sub> (g/m <sup>3</sup> )                          | 1.213                                                              | 1.215                                                                                                        | 1.182                                                                                                                       |
| $\mu$ (mm <sup>-1</sup> )                                   | 1.824                                                              | 1.998                                                                                                        | 1.737                                                                                                                       |
| <i>F</i> (000)                                              | 1304                                                               | 602                                                                                                          | 2728                                                                                                                        |
| Crystal size (mm)                                           | 0.50 x 0.38 x 0.36                                                 | 0.44 x 0.24 x 0.22                                                                                           | 0.24 x 0.22 x 0.18                                                                                                          |
| $\vartheta$ range (°)                                       | 1.707 to 25.047                                                    | 1.488 to 25.05                                                                                               | 1.236 to 25.05                                                                                                              |
|                                                             | -13<= <i>h</i> <=13                                                | -13<= <i>h</i> <=9                                                                                           | -40<= <i>h</i> <=40                                                                                                         |
| <i>h</i> , <i>k</i> , <i>l</i> range                        | -18<= <i>k</i> <=11                                                | -13<= <i>k</i> <=12                                                                                          | -16<= <i>k</i> <=16                                                                                                         |
|                                                             | -22<= <i>l</i> <=21                                                | -16<= <i>l</i> <=16                                                                                          | -12<= <i>l</i> <=19                                                                                                         |
| Reflections collected / unique                              | 16505 / 5909                                                       | 9491 / 5529                                                                                                  | 19112 / 6231                                                                                                                |
|                                                             | [ <i>R</i> (int) = 0.0417]                                         | [ <i>R</i> (int) = 0.0201]                                                                                   | [ <i>R</i> (int) = 0.0438]                                                                                                  |
| Completeness to $\vartheta$                                 | 99.9 % ( $\vartheta$ = 25.10)                                      | 98.7 % ( $\vartheta$ = 25.10)                                                                                | 96.6 % ( $\vartheta$ = 25.10)                                                                                               |
| Max. and min. transmission                                  | 0.7456 and 0.3383                                                  | 0.7456 and 0.6028                                                                                            | 0.7456 and 0.5915                                                                                                           |
| Refinement method                                           | Full-matrix least-squares on <i>F</i> <sup>2</sup>                 | Full-matrix least-squares on <i>F</i> <sup>2</sup>                                                           | Full-matrix least-squares on <i>F</i> <sup>2</sup>                                                                          |
| Data / restraints / parameters                              | 5909 / 0 / 344                                                     | 5529 / 0 / 309                                                                                               | 6231 / 0 / 354                                                                                                              |
| Goodness-of-fit on <i>F</i> <sup>2</sup>                    | 0.978                                                              | 1.011                                                                                                        | 1.04                                                                                                                        |
| Final <i>R</i> indices [ <i>I</i> >2 $\sigma$ ( <i>I</i> )] | <i>R</i> <sub>1</sub> = 0.0347                                     | <i>R</i> <sub>1</sub> = 0.0463                                                                               | <i>R</i> <sub>1</sub> = 0.0682                                                                                              |
|                                                             | <i>wR</i> <sub>2</sub> = 0.0719                                    | <i>wR</i> <sub>2</sub> = 0.1565                                                                              | <i>wR</i> <sub>2</sub> = 0.2132                                                                                             |
| <i>R</i> indices (all data)                                 | <i>R</i> <sub>1</sub> = 0.0552                                     | <i>R</i> <sub>1</sub> = 0.0542                                                                               | <i>R</i> <sub>1</sub> = 0.0826                                                                                              |
|                                                             | <i>wR</i> <sub>2</sub> = 0.0773                                    | <i>wR</i> <sub>2</sub> = 0.1697                                                                              | <i>wR</i> <sub>2</sub> = 0.2340                                                                                             |
| Largest diff. peak and hole (e·Å <sup>-3</sup> )            | 0.299 and -0.30                                                    | 0.738 and -0.883                                                                                             | 1.154 and -1.565                                                                                                            |

**Table S2.** Crystal data and collection parameters of complexes **3** and **4**

| Identification code                                 | <b>3</b>                                                                                                                     | <b>4</b>                                                                                                                    |
|-----------------------------------------------------|------------------------------------------------------------------------------------------------------------------------------|-----------------------------------------------------------------------------------------------------------------------------|
| Formula                                             | C <sub>48</sub> H <sub>86</sub> B <sub>2</sub> N <sub>14</sub> OP <sub>2</sub> S <sub>4</sub> Si <sub>4</sub> Y <sub>2</sub> | C <sub>47</sub> H <sub>86</sub> B <sub>2</sub> N <sub>14</sub> P <sub>2</sub> O <sub>2</sub> Si <sub>4</sub> Y <sub>2</sub> |
| Formula weight                                      | 1377.28                                                                                                                      | 1253.03                                                                                                                     |
| Temperature (K)                                     | 203(2)                                                                                                                       | 203(2)                                                                                                                      |
| Wavelength (Å)                                      | 0.71073                                                                                                                      | 0.71073                                                                                                                     |
| Crystal system                                      | Monoclinic                                                                                                                   | Monoclinic                                                                                                                  |
| Space group                                         | <i>P</i> 2(1)/ <i>c</i>                                                                                                      | <i>P</i> 2(1)/ <i>c</i>                                                                                                     |
| <i>a</i> (Å)                                        | 15.293(3)                                                                                                                    | 18.2262(19)                                                                                                                 |
| <i>b</i> (Å)                                        | 38.01(6)                                                                                                                     | 27.133(3)                                                                                                                   |
| <i>c</i> (Å)                                        | 17.798(3)                                                                                                                    | 17.7123(19)                                                                                                                 |
| $\alpha$ (deg)                                      | 90                                                                                                                           | 90                                                                                                                          |
| $\beta$ (deg)                                       | 109.192(3)                                                                                                                   | 113.322(2)                                                                                                                  |
| $\gamma$ (deg)                                      | 90                                                                                                                           | 90                                                                                                                          |
| <i>V</i> (Å <sup>3</sup> )                          | 9770(1)                                                                                                                      | 8043.7(15)                                                                                                                  |
| <i>Z</i>                                            | 4                                                                                                                            | 4                                                                                                                           |
| <i>D</i> <sub>c</sub> (g/m <sup>3</sup> )           | 0.936                                                                                                                        | 1.035                                                                                                                       |
| $\mu$ (mm <sup>-1</sup> )                           | 1.380                                                                                                                        | 1.572                                                                                                                       |
| <i>F</i> (000)                                      | 2872                                                                                                                         | 2624                                                                                                                        |
| Crystal size (mm)                                   | 0.32 x 0.22 x 0.08                                                                                                           | 0.28 x 0.23 x 0.20                                                                                                          |
| $\vartheta$ range (°)                               | 1.071 to 25.049                                                                                                              | 1.217 to 25.048                                                                                                             |
|                                                     | -18 ≤ <i>h</i> ≤ 18                                                                                                          | -21 ≤ <i>h</i> ≤ 21                                                                                                         |
| <i>h, k, l</i> range                                | -45 ≤ <i>k</i> ≤ 37                                                                                                          | -32 ≤ <i>k</i> ≤ 32                                                                                                         |
|                                                     | -20 ≤ <i>l</i> ≤ 21                                                                                                          | -19 ≤ <i>l</i> ≤ 21                                                                                                         |
| Reflections collected / unique                      | 58673 / 17248                                                                                                                | 48604 / 14238                                                                                                               |
|                                                     | [ <i>R</i> (int) = 0.0967]                                                                                                   | [ <i>R</i> (int) = 0.059]                                                                                                   |
| Completeness to $\vartheta$                         | 99.7 % ( $\vartheta$ = 25.10)                                                                                                | 99.4% ( $\vartheta$ = 25.10)                                                                                                |
| Max. and min. transmission                          | 0.7456 and 0.5633                                                                                                            | 0.7456 and 0.6786                                                                                                           |
| Refinement method                                   | Full-matrix least-squares on <i>F</i> <sup>2</sup>                                                                           | Full-matrix least-squares on <i>F</i> <sup>2</sup>                                                                          |
| Data / restraints / parameters                      | 17248 / 1 / 716                                                                                                              | 14238 / 0 / 680                                                                                                             |
| Goodness-of-fit on <i>F</i> <sup>2</sup>            | 1.01                                                                                                                         | 1.031                                                                                                                       |
| Final <i>R</i> indices [ <i>I</i> > 2σ( <i>I</i> )] | <i>R</i> <sub>1</sub> = 0.0590                                                                                               | <i>R</i> <sub>1</sub> = 0.0433                                                                                              |
|                                                     | <i>wR</i> <sub>2</sub> = 0.1465                                                                                              | <i>wR</i> <sub>2</sub> = 0.1127                                                                                             |
| <i>R</i> indices (all data)                         | <i>R</i> <sub>1</sub> = 0.1136                                                                                               | <i>R</i> <sub>1</sub> = 0.0675                                                                                              |
|                                                     | <i>wR</i> <sub>2</sub> = 0.1580                                                                                              | <i>wR</i> <sub>2</sub> = 0.1198                                                                                             |
| Largest diff. peak and hole (e·Å <sup>-3</sup> )    | 1.063 and -0.355                                                                                                             | 0.408 and -0.384                                                                                                            |

**Table S3.** Crystal data and collection parameters of complexes **5** and **6**

| Identification code                                           | <b>5</b>                                                                                                                                    | <b>6</b>                                                                                                                     |
|---------------------------------------------------------------|---------------------------------------------------------------------------------------------------------------------------------------------|------------------------------------------------------------------------------------------------------------------------------|
| Formula                                                       | C <sub>64</sub> H <sub>102</sub> B <sub>2</sub> N <sub>16</sub> O <sub>2</sub> P <sub>2</sub> S <sub>2</sub> Si <sub>4</sub> Y <sub>2</sub> | C <sub>64</sub> H <sub>102</sub> B <sub>2</sub> N <sub>16</sub> O <sub>4</sub> P <sub>2</sub> Si <sub>4</sub> Y <sub>2</sub> |
| Formula weight                                                | 1565.47                                                                                                                                     | 1533.35                                                                                                                      |
| Temperature (K)                                               | 173(2)                                                                                                                                      | 298(2)                                                                                                                       |
| Wavelength (Å)                                                | 0.71073                                                                                                                                     | 1.3414                                                                                                                       |
| Crystal system                                                | Triclinic                                                                                                                                   | Triclinic                                                                                                                    |
| Space group                                                   | <i>P</i> -1                                                                                                                                 | <i>P</i> -1                                                                                                                  |
| <i>a</i> (Å)                                                  | 12.934(6)                                                                                                                                   | 10.799(5)                                                                                                                    |
| <i>b</i> (Å)                                                  | 13.333(6)                                                                                                                                   | 13.614(8)                                                                                                                    |
| <i>c</i> (Å)                                                  | 14.362(7)                                                                                                                                   | 16.654(5)                                                                                                                    |
| $\alpha$ (deg)                                                | 90.678(8)                                                                                                                                   | 95.00(3)                                                                                                                     |
| $\beta$ (deg)                                                 | 101.070(8)                                                                                                                                  | 90.66(3)                                                                                                                     |
| $\gamma$ (deg)                                                | 114.517(7)                                                                                                                                  | 106.51(3)                                                                                                                    |
| <i>V</i> (Å <sup>3</sup> )                                    | 2199.9(18)                                                                                                                                  | 2336.9(18)                                                                                                                   |
| <i>Z</i>                                                      | 1                                                                                                                                           | 1                                                                                                                            |
| D <sub>c</sub> (g/m <sup>3</sup> )                            | 1.182                                                                                                                                       | 1.090                                                                                                                        |
| $\mu$ (mm <sup>-1</sup> )                                     | 1.496                                                                                                                                       | 1.879                                                                                                                        |
| <i>F</i> (000)                                                | 820                                                                                                                                         | 804                                                                                                                          |
| Crystal size (mm)                                             | 0.18 x 0.17 x 0.16                                                                                                                          | 0.2 x 0.05 x 0.03                                                                                                            |
| $\vartheta$ range (°)                                         | 1.688 to 25.05                                                                                                                              | 2.959 to 48.498                                                                                                              |
|                                                               | -15<= <i>h</i> <=13                                                                                                                         | -12<= <i>h</i> <=12                                                                                                          |
| <i>h, k, l</i> range                                          | -15<= <i>k</i> <=15                                                                                                                         | -15<= <i>k</i> <=15                                                                                                          |
|                                                               | -16<= <i>l</i> <=17                                                                                                                         | -18<= <i>l</i> <=18                                                                                                          |
| Reflections collected / unique                                | 12924 / 7597                                                                                                                                | 47301 / 6566                                                                                                                 |
|                                                               | [ <i>R</i> (int) = 0.0438]                                                                                                                  | [ <i>R</i> (int) = 0.1858]                                                                                                   |
| Completeness to $\vartheta$                                   | 97.7 % ( $\vartheta$ = 25.10)                                                                                                               | 96.4 % ( $\vartheta$ = 48.5)                                                                                                 |
| Max. and min. transmission                                    | 0.7456 and 0.5516                                                                                                                           | 0.7519 and 0.3592                                                                                                            |
| Refinement method                                             | Full-matrix least-squares on <i>F</i> <sup>2</sup>                                                                                          | Full-matrix least-squares on <i>F</i> <sup>2</sup>                                                                           |
| Data / restraints / parameters                                | 7597 / 18 / 435                                                                                                                             | 6566 / 24 / 435                                                                                                              |
| Goodness-of-fit on <i>F</i> <sup>2</sup>                      | 1.064                                                                                                                                       | 1.064                                                                                                                        |
| Final <i>R</i> indices [ <i>I</i> >2 $\sigma$ ( <i>I</i> )]   | <i>R</i> <sub>1</sub> = 0.1003                                                                                                              | <i>R</i> <sub>1</sub> = 0.1277                                                                                               |
|                                                               | <i>wR</i> <sub>2</sub> = 0.3027                                                                                                             | <i>wR</i> <sub>2</sub> = 0.3316                                                                                              |
| <i>R</i> indices (all data)                                   | <i>R</i> <sub>1</sub> = 0.1334                                                                                                              | <i>R</i> <sub>1</sub> = 0.1608                                                                                               |
|                                                               | <i>wR</i> <sub>2</sub> = 0.3413                                                                                                             | <i>wR</i> <sub>2</sub> = 0.3577                                                                                              |
| Largest diff. peak and hole (e <sup>-</sup> Å <sup>-3</sup> ) | 1.960 and -1.025                                                                                                                            | 1.049 and -1.531                                                                                                             |

**Table S4.** Crystal data and collection parameters of complexes **7·0.5C<sub>6</sub>H<sub>14</sub>** and **8**

| Identification code                                 | <b>7·0.5C<sub>6</sub>H<sub>14</sub></b>                                                                                      | <b>8</b>                                                                                                                     |
|-----------------------------------------------------|------------------------------------------------------------------------------------------------------------------------------|------------------------------------------------------------------------------------------------------------------------------|
| Formula                                             | C <sub>63</sub> H <sub>101</sub> B <sub>2</sub> N <sub>16</sub> O <sub>3</sub> P <sub>2</sub> Si <sub>4</sub> Y <sub>2</sub> | C <sub>74</sub> H <sub>112</sub> B <sub>2</sub> N <sub>18</sub> O <sub>2</sub> P <sub>2</sub> Si <sub>4</sub> Y <sub>2</sub> |
| Formula weight                                      | 1504.33                                                                                                                      | 1659.55                                                                                                                      |
| Temperature (K)                                     | 173(2)                                                                                                                       | 203(2)                                                                                                                       |
| Wavelength (Å)                                      | 0.71073                                                                                                                      | 0.71073                                                                                                                      |
| Crystal system                                      | Triclinic                                                                                                                    | Monoclinic                                                                                                                   |
| Space group                                         | <i>P</i> -1                                                                                                                  | <i>P</i> 2(1)/ <i>c</i>                                                                                                      |
| <i>a</i> (Å)                                        | 13.145(12)                                                                                                                   | 14.031(2)                                                                                                                    |
| <i>b</i> (Å)                                        | 17.265(16)                                                                                                                   | 13.510(2)                                                                                                                    |
| <i>c</i> (Å)                                        | 19.436(18)                                                                                                                   | 28.504(5)                                                                                                                    |
| $\alpha$ (deg)                                      | 98.426(2)                                                                                                                    | 90                                                                                                                           |
| $\beta$ (deg)                                       | 106.504(2)                                                                                                                   | 98.218(3)                                                                                                                    |
| $\gamma$ (deg)                                      | 111.624(2)                                                                                                                   | 90                                                                                                                           |
| <i>V</i> (Å <sup>3</sup> )                          | 3849.6(6)                                                                                                                    | 5348(16)                                                                                                                     |
| <i>Z</i>                                            | 2                                                                                                                            | 2                                                                                                                            |
| D <sub>c</sub> (g/m <sup>3</sup> )                  | 1.298                                                                                                                        | 1.031                                                                                                                        |
| $\mu$ (mm <sup>-1</sup> )                           | 1.656                                                                                                                        | 1.197                                                                                                                        |
| <i>F</i> (000)                                      | 1578                                                                                                                         | 1744                                                                                                                         |
| Crystal size (mm)                                   | 0.40 x 0.30 x 0.28                                                                                                           | 0.32 x 0.28 x 0.26                                                                                                           |
| $\vartheta$ range (°)                               | 1.756 to 25.05                                                                                                               | 1.444 to 25.05                                                                                                               |
|                                                     | -15 ≤ <i>h</i> ≤ 15                                                                                                          | -16 ≤ <i>h</i> ≤ 10                                                                                                          |
| <i>h, k, l</i> range                                | -20 ≤ <i>k</i> ≤ 20                                                                                                          | -16 ≤ <i>k</i> ≤ 15                                                                                                          |
|                                                     | -16 ≤ <i>l</i> ≤ 23                                                                                                          | -33 ≤ <i>l</i> ≤ 33                                                                                                          |
| Reflections collected / unique                      | 23151 / 13414<br>[ <i>R</i> (int) = 0.0287]                                                                                  | 31246 / 9423<br>[ <i>R</i> (int) = 0.0356]                                                                                   |
| Completeness to $\vartheta$                         | 98.5 % ( $\vartheta$ = 25.10)                                                                                                | 99.6 % ( $\vartheta$ = 25.10)                                                                                                |
| Max. and min. transmission                          | 0.7456 and 0.6871                                                                                                            | 0.7456 and 0.6680                                                                                                            |
| Refinement method                                   | Full-matrix least-squares on <i>F</i> <sup>2</sup>                                                                           | Full-matrix least-squares on <i>F</i> <sup>2</sup>                                                                           |
| Data / restraints / parameters                      | 13414 / 0 / 852                                                                                                              | 9423 / 0 / 480                                                                                                               |
| Goodness-of-fit on <i>F</i> <sup>2</sup>            | 1.001                                                                                                                        | 1.058                                                                                                                        |
| Final <i>R</i> indices [ <i>I</i> > 2σ( <i>I</i> )] | <i>R</i> <sub>1</sub> = 0.0465<br><i>wR</i> <sub>2</sub> = 0.1347                                                            | <i>R</i> <sub>1</sub> = 0.0514<br><i>wR</i> <sub>2</sub> = 0.1868                                                            |
| <i>R</i> indices (all data)                         | <i>R</i> <sub>1</sub> = 0.0699<br><i>wR</i> <sub>2</sub> = 0.1545                                                            | <i>R</i> <sub>1</sub> = 0.0637<br><i>wR</i> <sub>2</sub> = 0.1999                                                            |
| Largest diff. peak and hole (e·Å <sup>-3</sup> )    | 0.863 and -0.571                                                                                                             | 0.826 and -0.351                                                                                                             |

**Table S5.** Crystal data and collection parameters of complexes **9** and **10**

| Identification code                                 | <b>9</b>                                                                                                                    | <b>10</b>                                                                                                                     |
|-----------------------------------------------------|-----------------------------------------------------------------------------------------------------------------------------|-------------------------------------------------------------------------------------------------------------------------------|
| Formula                                             | C <sub>42</sub> H <sub>78</sub> B <sub>2</sub> N <sub>14</sub> P <sub>2</sub> S <sub>4</sub> Si <sub>4</sub> Y <sub>2</sub> | C <sub>46</sub> H <sub>86</sub> B <sub>2</sub> N <sub>14</sub> OP <sub>2</sub> Se <sub>3</sub> Si <sub>4</sub> Y <sub>2</sub> |
| Formula weight                                      | 1281.16                                                                                                                     | 1461.90                                                                                                                       |
| Temperature (K)                                     | 173(2)                                                                                                                      | 173(2)                                                                                                                        |
| Wavelength (Å)                                      | 0.71073                                                                                                                     | 0.71073                                                                                                                       |
| Crystal system                                      | Monoclinic                                                                                                                  | Triclinic                                                                                                                     |
| Space group                                         | <i>P</i> 2(1)/ <i>c</i>                                                                                                     | <i>P</i> -1                                                                                                                   |
| <i>a</i> (Å)                                        | 11.1809(12)                                                                                                                 | 13.6391(14)                                                                                                                   |
| <i>b</i> (Å)                                        | 20.007(2)                                                                                                                   | 14.3186(14)                                                                                                                   |
| <i>c</i> (Å)                                        | 18.356(2)                                                                                                                   | 20.338(2)                                                                                                                     |
| $\alpha$ (deg)                                      | 90                                                                                                                          | 78.382(2)                                                                                                                     |
| $\beta$ (deg)                                       | 106.077(2)                                                                                                                  | 77.425(2)                                                                                                                     |
| $\gamma$ (deg)                                      | 90                                                                                                                          | 87.151(2)                                                                                                                     |
| <i>V</i> (Å <sup>3</sup> )                          | 3945.6(7)                                                                                                                   | 3797.2(7)                                                                                                                     |
| <i>Z</i>                                            | 2                                                                                                                           | 2                                                                                                                             |
| <i>D</i> <sub>c</sub> (g/m <sup>3</sup> )           | 1.078                                                                                                                       | 1.279                                                                                                                         |
| $\mu$ (mm <sup>-1</sup> )                           | 1.704                                                                                                                       | 3.102                                                                                                                         |
| <i>F</i> (000)                                      | 1332                                                                                                                        | 1488                                                                                                                          |
| Crystal size (mm)                                   | 0.16 x 0.14 x 0.10                                                                                                          | 0.50 x 0.32 x 0.29                                                                                                            |
| $\vartheta$ range (°)                               | 2.036 to 25.05                                                                                                              | 1.615 to 25.048                                                                                                               |
|                                                     | -13<= <i>h</i> <=10                                                                                                         | -16<= <i>h</i> <=16                                                                                                           |
| <i>h, k, l</i> range                                | -23<= <i>k</i> <=23                                                                                                         | -16<= <i>k</i> <=17                                                                                                           |
|                                                     | -21<= <i>l</i> <=21                                                                                                         | -24<= <i>l</i> <=21                                                                                                           |
| Reflections collected / unique                      | 23586 / 6947                                                                                                                | 22793 / 13230                                                                                                                 |
|                                                     | [ <i>R</i> (int) = 0.0591]                                                                                                  | [ <i>R</i> (int) = 0.0263]                                                                                                    |
| Completeness to $\vartheta$                         | 99.3 % ( $\vartheta$ = 25.10)                                                                                               | 98.6 % ( $\vartheta$ = 25.10)                                                                                                 |
| Max. and min. transmission                          | 0.7456 and 0.6564                                                                                                           | 0.7455 and 0.5269                                                                                                             |
| Refinement method                                   | Full-matrix least-squares on <i>F</i> <sup>2</sup>                                                                          | Full-matrix least-squares on <i>F</i> <sup>2</sup>                                                                            |
| Data / restraints / parameters                      | 6947 / 0 / 327                                                                                                              | 13252 / 0 / 689                                                                                                               |
| Goodness-of-fit on <i>F</i> <sup>2</sup>            | 1.029                                                                                                                       | 1.013                                                                                                                         |
| Final <i>R</i> indices [ <i>I</i> >2σ( <i>I</i> )]  | <i>R</i> <sub>1</sub> = 0.0460                                                                                              | <i>R</i> <sub>1</sub> = 0.0417                                                                                                |
|                                                     | <i>wR</i> <sub>2</sub> = 0.1430                                                                                             | <i>wR</i> <sub>2</sub> = 0.1312                                                                                               |
| <i>R</i> indices (all data)                         | <i>R</i> <sub>1</sub> = 0.0706                                                                                              | <i>R</i> <sub>1</sub> = 0.0577                                                                                                |
|                                                     | <i>wR</i> <sub>2</sub> = 0.1545                                                                                             | <i>wR</i> <sub>2</sub> = 0.1445                                                                                               |
| Largest diff. peak and hole<br>(e·Å <sup>-3</sup> ) | 0.433 and -0.414                                                                                                            | 0.744 and -0.643                                                                                                              |



#### 4. Molecular structures and important bond parameters of Complexes 1-10

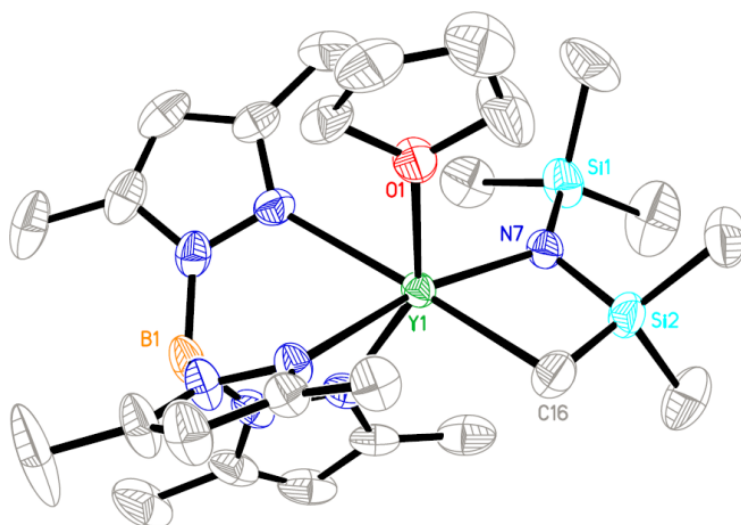

**Figure S23.** Molecular structure of **1** with ellipsoids set at 30% probability. All hydrogen atoms are omitted for clarity.

**Table S6.** Selected bond lengths (Å) and bond angles (°) of **1**

| Bond length (Å) |           |            |          |
|-----------------|-----------|------------|----------|
| Y1-N7           | 2.241(3)  | Si2-C16    | 1.788(6) |
| Y1-O1           | 2.348(3)  | Si1-N7     | 1.683(4) |
| Y1-C16          | 2.402(5)  | Si2-N7     | 1.743(4) |
| Bond Angle (°)  |           |            |          |
| N7-Y1-C16       | 72.13(17) | Si1-N7-Si2 | 127.9(2) |
| N7-Y1-O1        | 98.65(12) | Si1-N7-Y1  | 135.6(2) |
| Si2-C16-Y1      | 89.8(2)   | N7-Si2-C16 | 101.6(2) |
| Si2-N7-Y1       | 96.44(16) |            |          |

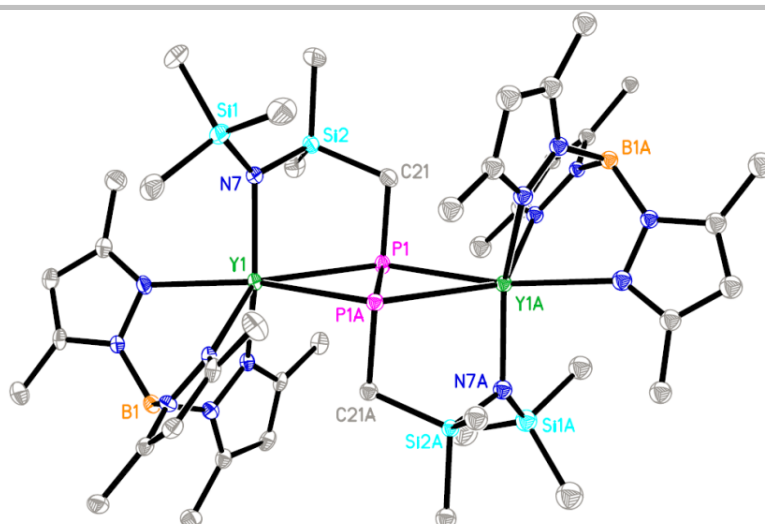

**Figure S24.** Molecular structure of **2** with ellipsoids set at 30% probability. All hydrogen atoms are omitted for clarity.

**Table S7.** Selected bond lengths (Å) and bond angles (°) of **2**

| Bond length (Å) |             |            |            |
|-----------------|-------------|------------|------------|
| Y1-N7           | 2.252(4)    | P1-C21     | 1.901(5)   |
| Y1-P1           | 2.8874(12)  | N7-Si1     | 1.706(4)   |
| Y1-P1A          | 2.8349 (12) | N7-Si2     | 1.717(4)   |
| P1-P1A          | 2.213(2)    | Si2-C21    | 1.867(5)   |
| Bond Angle (°)  |             |            |            |
| P1A-Y1-P1       | 45.48(4)    | Y1A-P1-Y1  | 134.52(4)  |
| N7-Y1-P1        | 96.20(10)   | C21-P1-Y1A | 90.17(15)  |
| N7-Y1-P1A       | 83.84(10)   | Si2-C21-P1 | 107.1(2)   |
| P1A-P1-Y1       | 66.01(5)    | Si1-N7-Si2 | 123.3(2)   |
| P1A-P1-Y1A      | 68.51(5)    | Si1-N7-Y1  | 120.8(2)   |
| C21-P1-P1A      | 100.01(17)  | Si2-N7-Y1  | 112.10(19) |
| C21-P1-Y1       | 97.49 (15)  | N7-Si2-C21 | 109.4(2)   |

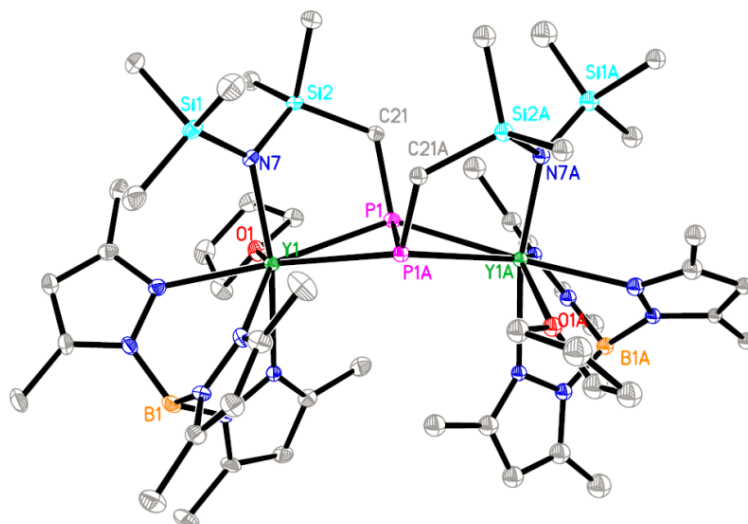

**Figure S25.** Molecular structure of **2-THF** with ellipsoids set at 30% probability. All hydrogen atoms are omitted for clarity.

**Table S8.** S Selected bond lengths (Å) and bond angles (°) of **2-THF**

| Bond length (Å) |             |            |            |
|-----------------|-------------|------------|------------|
| Y1-O1           | 2.567(4)    | P1-P1A     | 2.190(3)   |
| Y1-N7           | 2.303(4)    | P1-Y1A     | 2.9097(15) |
| Y1-P1           | 2.8501(14)  | Si1-N7     | 1.720(4)   |
| Y1-P1A          | 2.9097(15)  | Si2-N7     | 1.712(4)   |
| P1-C21          | 1.869(5)    | Si2-C21    | 1.906(5)   |
| Bond Angle (°)  |             |            |            |
| P1-Y1-P1A       | 44.69(5)    | C21-P1-Y1  | 97.40(17)  |
| N7-Y1-P1        | 86.71(11)   | C21-P1-Y1A | 115.85(18) |
| N7-Y1-P1A       | 88.43(11)   | P1-C21-Si2 | 120.0(3)   |
| C21-P1-P1A      | 105.47 (18) | Si2-N7-Si1 | 118.6(3)   |
| P1A-P1-Y1       | 69.10(7)    | Si2-N7-Y1  | 114.8(2)   |
| P1A-P1-Y1A      | 66.22(7)    | Si1-N7-Y1  | 126.5(2)   |
| Y1-P1-Y1A       | 129.57(5)   | N7-Si2-C21 | 113.4(2)   |

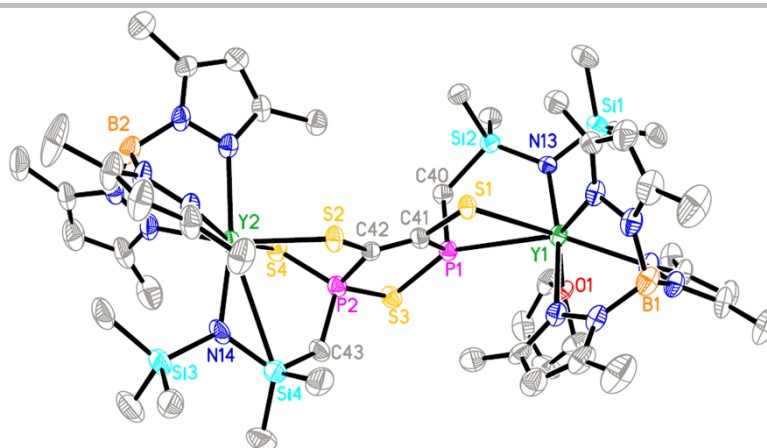

**Figure S26.** Molecular structure of **3** with ellipsoids set at 30% probability. All hydrogen atoms are omitted for clarity.

**Table S9.** Selected bond lengths (Å) and bond angles (°) of **3**

|                 |            |            |            |
|-----------------|------------|------------|------------|
| Bond length (Å) |            |            |            |
| Y1-S1           | 2.8319(14) | P2-S4      | 1.999(2)   |
| Y1-P1           | 3.1242(15) | P2-S3      | 2.100(2)   |
| Y1-O1           | 2.364(4)   | S1-C41     | 1.737(6)   |
| Y1-N13          | 2.296(4)   | S2-C42     | 1.749(5)   |
| Y2-S2           | 2.7266(15) | C41-C42    | 1.332(6)   |
| Y2-S4           | 2.8045(17) | Si1-N13    | 1.744(4)   |
| Y2-N14          | 2.286(5)   | Si2-N13    | 1.725(4)   |
| P1-C41          | 1.790(6)   | Si3-N14    | 1.729(4)   |
| P1-C40          | 1.809(5)   | Si4-N14    | 1.719(5)   |
| P1-S3           | 2.157(2)   | Si2-C40    | 1.895(5)   |
| P2-C42          | 1.792(6)   | Si4-C43    | 1.914(6)   |
| P2-C43          | 1.800(5)   |            |            |
| Bond Angle (°)  |            |            |            |
| N13-Y1-S1       | 89.94(10)  | C42-P2-S3  | 103.73(18) |
| S1-Y1-P1        | 56.78(4)   | C43-P2-S3  | 104.6(2)   |
| N14-Y2-S2       | 95.09(12)  | S4-P2-S3   | 113.55(9)  |
| N14-Y2-S4       | 97.31(13)  | C41-S1-Y1  | 101.6(2)   |
| S2-Y2-S4        | 84.89(4)   | C42-S2-Y2  | 105.05(18) |
| C41-P1-C40      | 106.4(3)   | P2-S3-P1   | 95.06(8)   |
| C41-P1-S3       | 99.63(19)  | P2-S4-Y2   | 91.41(7)   |
| C40-P1-S3       | 103.74(18) | C42-C41-S1 | 129.1(5)   |
| C41-P1-Y1       | 90.28(17)  | C42-C41-P1 | 123.4(4)   |
| C40-P1-Y1       | 99.17(17)  | S1-C41-P1  | 107.5(3)   |
| S3-P1-Y1        | 151.20(8)  | C41-C42-S2 | 127.9(4)   |
| C42-P2-C43      | 112.2(3)   | C41-C42-P2 | 117.2(4)   |
| C42-P2-S4       | 111.96(18) | S2-C42-P2  | 114.9(3)   |
| C43-P2-S4       | 110.41(19) | P2-C43-Si4 | 126.8(4)   |

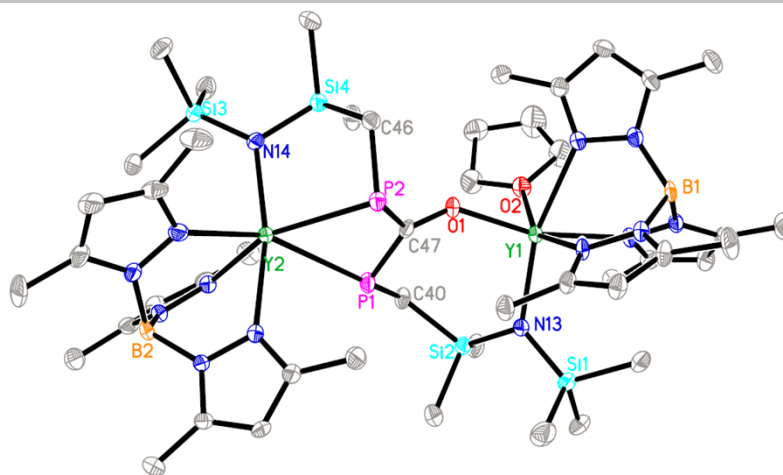

**Figure S27.** Molecular structure of **4** with ellipsoids set at 30% probability. All hydrogen atoms are omitted for clarity. Selected bond lengths (Å) and bond angles (°):

**Table S10.** Selected bond lengths (Å) and bond angles (°) of **4**

|                 |            |             |            |
|-----------------|------------|-------------|------------|
| Bond length (Å) |            |             |            |
| Y1-O1           | 2.153(2)   | P2-C47      | 1.828(4)   |
| Y1-N13          | 2.295(3)   | P2-C46      | 1.877(4)   |
| Y1-O2           | 2.405(3)   | O1-C47      | 1.320(4)   |
| Y2-N14          | 2.286(3)   | Si1-N13     | 1.728(3)   |
| Y2-P2           | 2.8306(10) | Si3-N14     | 1.715(3)   |
| Y2-P1           | 2.9128(10) | Si2-N13     | 1.728(3)   |
| P1-C47          | 1.713(4)   | Si4-N14     | 1.730(3)   |
| P1-C40          | 1.847(4)   |             |            |
| Bond Angle (°)  |            |             |            |
| O1-Y1-N13       | 101.03(9)  | P1-C40-Si2  | 121.2(2)   |
| O1-Y1-O2        | 88.80(9)   | Si4-C46-P2  | 117.2(2)   |
| N13-Y1-O2       | 109.84(10) | O1-C47-P1   | 124.7(3)   |
| N14-Y2-P2       | 86.77(7)   | O1-C47-P2   | 122.2(3)   |
| N14-Y2-P1       | 110.07(7)  | P1-C47-P2   | 113.08(19) |
| P2-Y2-P1        | 61.91(3)   | Si2-N13-Si1 | 114.92(17) |
| C47-P1-C40      | 105.22(17) | Si2-N13-Y1  | 118.36(15) |
| C47-P1-Y2       | 87.62(11)  | Si1-N13-Y1  | 126.57(15) |
| C40-P1-Y2       | 148.37(12) | Si3-N14-Si4 | 119.31(17) |
| C47-P2-C46      | 100.61(17) | Si3-N14-Y2  | 125.12(15) |
| C47-P2-Y2       | 88.07(12)  | Si4-N14-Y2  | 114.96(14) |
| C46-P2-Y2       | 97.08(11)  | N13-Si2-C40 | 115.51(16) |
| C47-O1-Y1       | 138.4(2)   | N14-Si4-C46 | 111.04(16) |

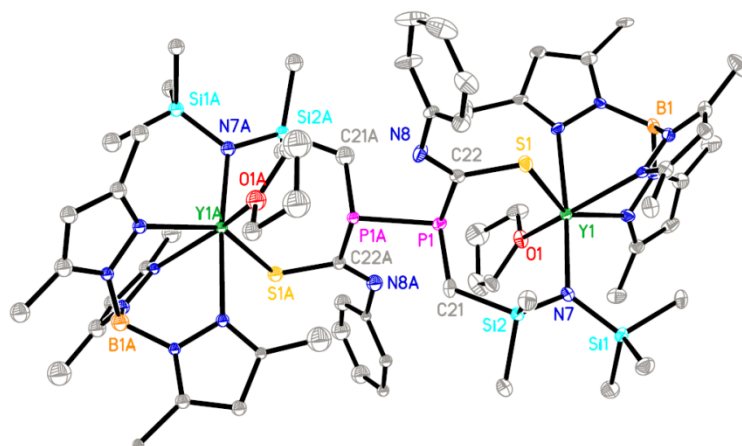

**Figure S28.** Molecular structure of **5** with ellipsoids set at 30% probability. All hydrogen atoms are omitted for clarity.

**Table S11.** Selected bond lengths (Å) and bond angles (°) of **5**

|                 |           |            |           |
|-----------------|-----------|------------|-----------|
| Bond length (Å) |           |            |           |
| Y1-S1           | 2.742(3)  | Si1-N7     | 1.723(8)  |
| Y1-O1           | 2.368(6)  | Si2-N7     | 1.701(7)  |
| Y1-N7           | 2.321 (8) | Si2-C21    | 1.882(9)  |
| P1-C21          | 1.827(11) | S1-C22     | 1.724(8)  |
| P1-C22          | 1.842(9)  | N8-C22     | 1.251(11) |
| P1-P1A          | 2.235(4)  |            |           |
| Bond Angle (°)  |           |            |           |
| S1-Y1-N7        | 91.7(2)   | Si2-N7-Y1  | 121.2(4)  |
| C21-P1-C22      | 103.6(4)  | P1-C21-Si2 | 123.2(5)  |
| C21-P1-P1A      | 100.6(3)  | N8-C22-S1  | 128.9(7)  |
| C22-P1-P1A      | 99.5(3)   | N8-C22-P1  | 118.3(7)  |
| C22-S1-Y1       | 108.2(3)  | S1-C22-P1  | 112.4(4)  |

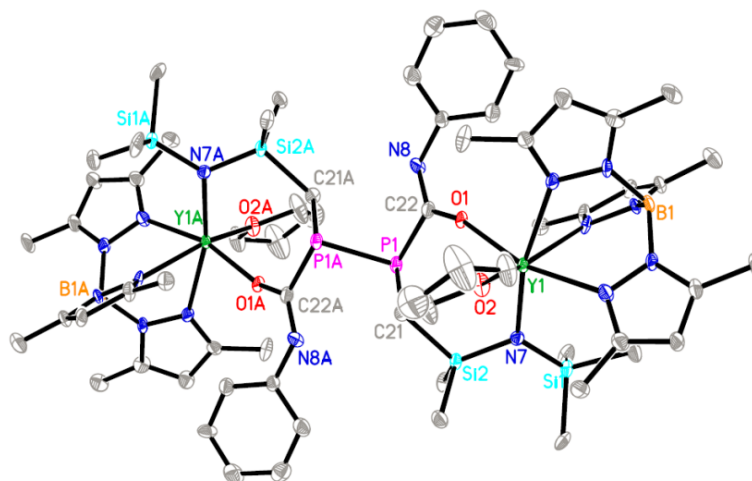

**Figure S29.** Molecular structure of **6** with ellipsoids set at 30% probability. All hydrogen atoms are omitted for clarity.

**Table S12.** Selected bond lengths (Å) and bond angles (°) of **6**

|                 |           |            |           |
|-----------------|-----------|------------|-----------|
| Bond length (Å) |           |            |           |
| Y1-O2           | 2.409(7)  | Si1-N7     | 1.715(9)  |
| Y1-O1           | 2.117(7)  | Si2-N7     | 1.716(9)  |
| Y1-N7           | 2.279(9)  | Si2-C21    | 1.898(11) |
| P1-C21          | 1.826(11) | O1-C22     | 1.305(13) |
| P1-C22          | 1.851(12) | N8-C22     | 1.305(15) |
| P1-P1A          | 2.209(5)  |            |           |
| Bond Angle (°)  |           |            |           |
| O1-Y1-N7        | 100.9(3)  | Si2-N7-Y1  | 115.5(4)  |
| C21-P1-C22      | 99.5(5)   | P1-C21-Si2 | 115.0(6)  |
| C21-P1-P1A      | 100.2(4)  | N8-C22-O1  | 128.1(10) |
| C22-P1-P1A      | 98.8(4)   | N8-C22-P1  | 115.1(8)  |
| C22-O1-Y1       | 153.1(7)  | O1-C22-P1  | 116.7(8)  |

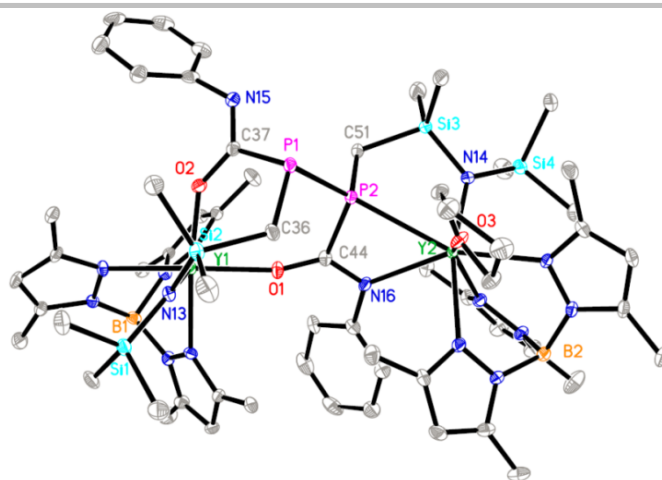

**Figure S30.** Molecular structure of **7** with ellipsoids set at 30% probability. All hydrogen atoms are omitted for clarity.

**Table S13.** Selected bond lengths (Å) and bond angles (°) of **7**

|                 |             |             |          |
|-----------------|-------------|-------------|----------|
| Bond length (Å) |             |             |          |
| Y1-O1           | 2.227(3)    | P2-C44      | 1.870(5) |
| Y1-O2           | 2.172(3)    | O1-C44      | 1.262(6) |
| Y1-N13          | 2.299(4)    | O2-C37      | 1.318(6) |
| Y2-O3           | 2.498(4)    | N16-C44     | 1.332(6) |
| Y2-N16          | 2.552(4)    | N15-C37     | 1.261(7) |
| Y2-P2           | 2.9417(14)  | N16-C44     | 1.332(6) |
| P1-C36          | 1.847(6)    | Si1-N13     | 1.718(4) |
| P1-C37          | 1.874(5)    | Si2-N13     | 1.717(4) |
| P1-P2           | 2.1946 (19) | Si3-N14     | 1.726(4) |
| P2-C51          | 1.848(6)    | Si4-N14     | 1.743(5) |
| Bond Angle (°)  |             |             |          |
| O2-Y1-O1        | 86.18(13)   | C44-O1-Y1   | 162.8(3) |
| O2-Y1-N13       | 90.81(14)   | C37-O2-Y1   | 144.6(3) |
| O1-Y1-N13       | 104.60(14)  | C44-N16-Y2  | 111.0(3) |
| N14-Y2-N16      | 104.90(15)  | N16-C44-P2  | 108.2(4) |
| N14-Y2-P2       | 81.72(11)   | P1-C36-Si2  | 122.4(3) |
| N16-Y2-P2       | 56.25(9)    | P2-C51-Si3  | 111.0(3) |
| C36-P1-P2       | 97.14(19)   | N15-C37-O2  | 128.4(5) |
| C37-P1-P2       | 103.55(17)  | N15-C37-P1  | 111.3(4) |
| C36-P1-C37      | 107.3(2)    | O2-C37-P1   | 120.1(4) |
| C51-P2-C44      | 104.9(2)    | O1-C44-N16  | 128.5(5) |
| C51-P2-P1       | 108.76(18)  | O1-C44-P2   | 123.3(4) |
| C44-P2-P1       | 108.79(17)  | N16-C44-P2  | 108.2(4) |
| C51-P2-Y2       | 98.08(17)   | Si2-N13-Si1 | 118.2(2) |
| C44-P2-Y2       | 82.56(16)   | Si3-N14-Si4 | 114.5(2) |
| P(1)-P(2)-Y(2)  | 146.29(7)   |             |          |



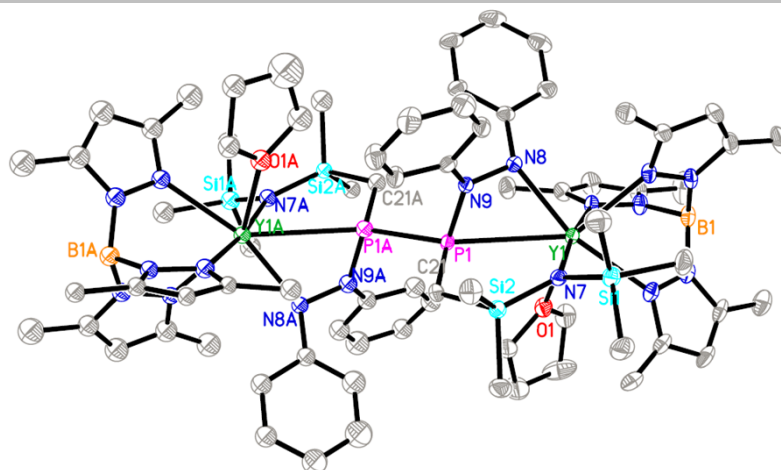

**Figure S31.** Molecular structure of **8** with ellipsoids set at 30% probability. All hydrogen atoms are omitted for clarity.

**Table S14.** Selected bond lengths (Å) and bond angles (°) of **8**

|                 |            |            |            |
|-----------------|------------|------------|------------|
| Bond length (Å) |            |            |            |
| Y1-N7           | 2.317(3)   | P1-P1A     | 2.2955(18) |
| Y1-N8           | 2.342(3)   | Si1-N7     | 1.740(3)   |
| Y1-O1           | 2.501(3)   | Si2-N7     | 1.724(3)   |
| Y1-P1           | 3.1503(10) | Si2-C21    | 1.906(4)   |
| P1-N9           | 1.699(3)   | N8-N9      | 1.442(4)   |
| P1-C21          | 1.820(4)   | N9-C28     | 1.399(5)   |
| Bond Angle (°)  |            |            |            |
| N7-Y1-N8        | 96.49(11)  | P1A-P1-Y1  | 157.13(6)  |
| N7-Y1-P1        | 77.30(8)   | P1-C21-Si2 | 117.2(2)   |
| N8-Y1-P1        | 53.95(8)   | N7-Si2-C21 | 115.18(16) |
| N9-P1-C21       | 105.37(17) | Si2-N7-Si1 | 113.12(19) |
| N9-P1-P1A       | 106.88(12) | Si2-N7-Y1  | 125.65(16) |
| C21-P1-P1A      | 101.89(13) | Si1-N7-Y1  | 121.13(16) |
| N9-P1-Y1        | 71.84(11)  | N9-N8-Y1   | 106.4(2)   |
| C21-P1-Y1       | 100.37(12) | N8-N9-P1   | 111.1(2)   |

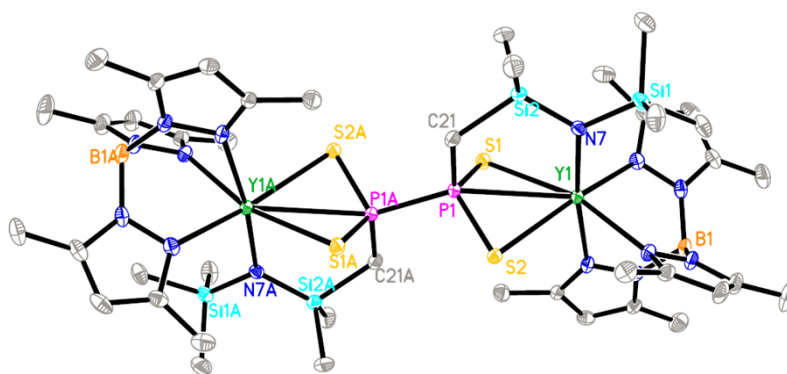

**Figure S32.** Molecular structure of **9** with ellipsoids set at 30% probability. All hydrogen atoms are omitted for clarity.

**Table S15.** Selected bond lengths (Å) and bond angles (°) of **9**

| Bond length (Å) |            |            |            |
|-----------------|------------|------------|------------|
| Y1-N7           | 2.275(4)   | P1-S1      | 2.0097(17) |
| Y1-S2           | 2.7847(13) | P1-P1A     | 2.211(2)   |
| Y1-S1           | 2.8120(13) | Si1-N7     | 1.728(4)   |
| Y1-P1           | 3.1365(12) | Si2-N7     | 1.722(4)   |
| P1-C21          | 1.777(5)   | Si2-C21    | 1.932(5)   |
| P1-S2           | 2.0041(16) |            |            |
| Bond Angle (°)  |            |            |            |
| N7-Y1-S2        | 95.02(10)  | C21-P1-Y1  | 99.59(15)  |
| N7-Y1-S1        | 91.81(10)  | S2-P1-Y1   | 60.98(4)   |
| S2-Y1-S1        | 73.46(4)   | S1-P1-Y1   | 61.74(4)   |
| N7-Y1-P1        | 80.11(9)   | P1A-P1-Y1  | 153.83(8)  |
| S2-Y1-P1        | 39.00(3)   | P1-S1-Y1   | 79.25(5)   |
| S1-Y1-P1        | 39.01(3)   | P1-S2-Y1   | 80.03(5)   |
| C21-P1-S2       | 110.30(17) | P1-C21-Si2 | 116.3(3)   |
| C21-P1-S1       | 110.62(18) | Si2-N7-Si1 | 116.1(2)   |
| S2-P1-S1        | 113.01(7)  | Si2-N7-Y1  | 121.83(19) |
| C21-P1-P1A      | 106.56(17) | Si1-N7-Y1  | 121.86(19) |
| S2-P1-P1A       | 107.59(8)  | N7-Si2-C21 | 114.91(19) |
| S1-P1-P1A       | 108.49(9)  |            |            |

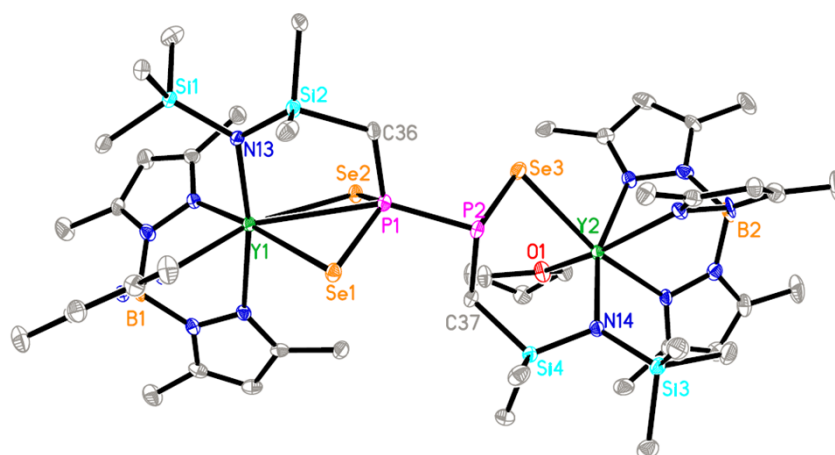

**Figure S33.** Molecular structure of **10** with ellipsoids set at 30% probability. All hydrogen atoms are omitted for clarity.

**Table S16.** Selected bond lengths (Å) and bond angles (°) of **10**

| Bond length (Å) |            |            |            |
|-----------------|------------|------------|------------|
| Y1-N13          | 2.272(4)   | P1-Se1     | 2.2008(14) |
| Y1-Se1          | 2.8738(7)  | P1-P2      | 2.2089(19) |
| Y1-Se2          | 2.8867(7)  | P2-C37     | 1.835(5)   |
| Y1-P1           | 3.2272(14) | P2-Se3     | 2.2292(14) |
| Y2-N14          | 2.265(4)   | Si2-C36    | 1.919(5)   |
| Y2-O1           | 2.397(3)   | Si4-C37    | 1.887(5)   |
| Y2-Se3          | 2.8539(8)  | Si2-N13    | 1.715(4)   |
| P1-C36          | 1.803(5)   | Si4-N14    | 1.707(4)   |
| P1-Se2          | 2.1837(14) |            |            |
| Bond Angle (°)  |            |            |            |
| N13-Y1-Se1      | 92.57(10)  | C36-P1-Y1  | 96.03(17)  |
| N13-Y1-Se2      | 95.93(11)  | Se2-P1-Y1  | 60.92(3)   |
| Se1-Y1-Se2      | 78.557(19) | Se1-P1-Y1  | 60.48(3)   |
| N13-Y1-P1       | 80.59(11)  | P2-P1-Y1   | 154.95(7)  |
| Se1-Y1-P1       | 41.79(3)   | C37-P2-P1  | 97.12(17)  |
| Se2-Y1-P1       | 41.38(3)   | C37-P2-Se3 | 103.70(17) |
| N14-Y2-Se3      | 105.65(11) | P1-P2-Se3  | 101.08(6)  |
| C36-P1-Se2      | 107.27(19) | P1-Se1-Y1  | 77.73(4)   |
| C36-P1-Se1      | 109.08(18) | P1-Se2-Y1  | 77.70(4)   |
| Se2-P1-Se1      | 112.56(6)  | P2-Se3-Y2  | 95.20(4)   |
| C36-P1-P2       | 107.88(18) | P1-C36-Si2 | 118.6(3)   |
| Se2-P1-P2       | 116.43(7)  | P2-C37-Si4 | 114.9(3)   |
| Se1-P1-P2       | 103.38(6)  |            |            |

## 5. Computational Details

All DFT calculations were performed with Gaussian 09.<sup>6</sup> Geometries were fully optimized in gas phase without symmetry constraints, employing the B3PW91 functional<sup>7</sup> and the Stuttgart effective core potential for Y<sup>8</sup> and Si<sup>9</sup> augmented with a polarization functions ( $\zeta_f = 1.000$  for Y and  $\zeta_d = 0.284$  for Si). For the other elements (H, P, C, N, O, B and S), Pople's double- $\zeta$  basis set 6-31G(d,p)<sup>10</sup> was used. Calculations of vibrational frequencies were systematically done in order to characterize the nature of stationary points. The electron density and partial charge distribution were examined in terms of localized electron-pair bonding units using the NBO program<sup>11</sup> available in Gaussian 09.

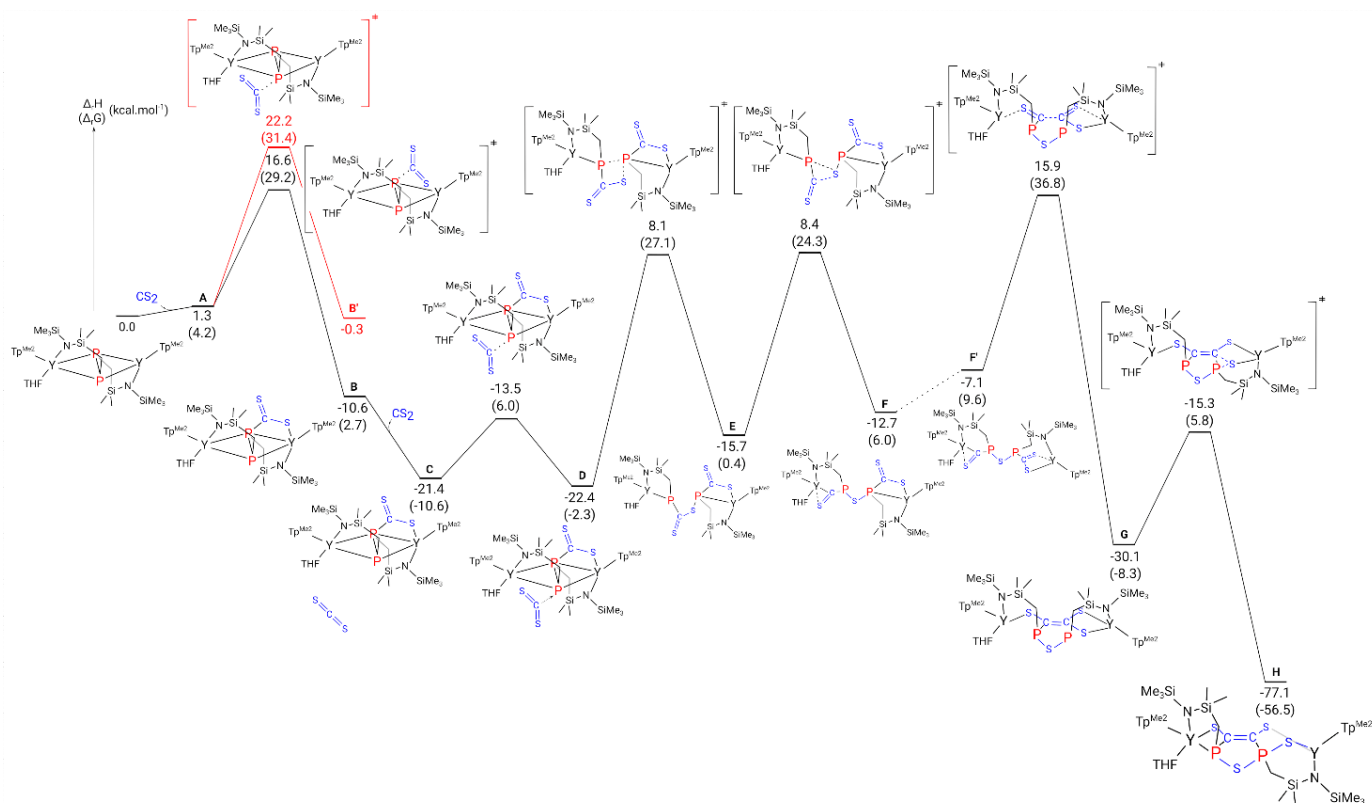

Figure S34. Computed (DFT) Gibbs Free energy pathway at room temperature

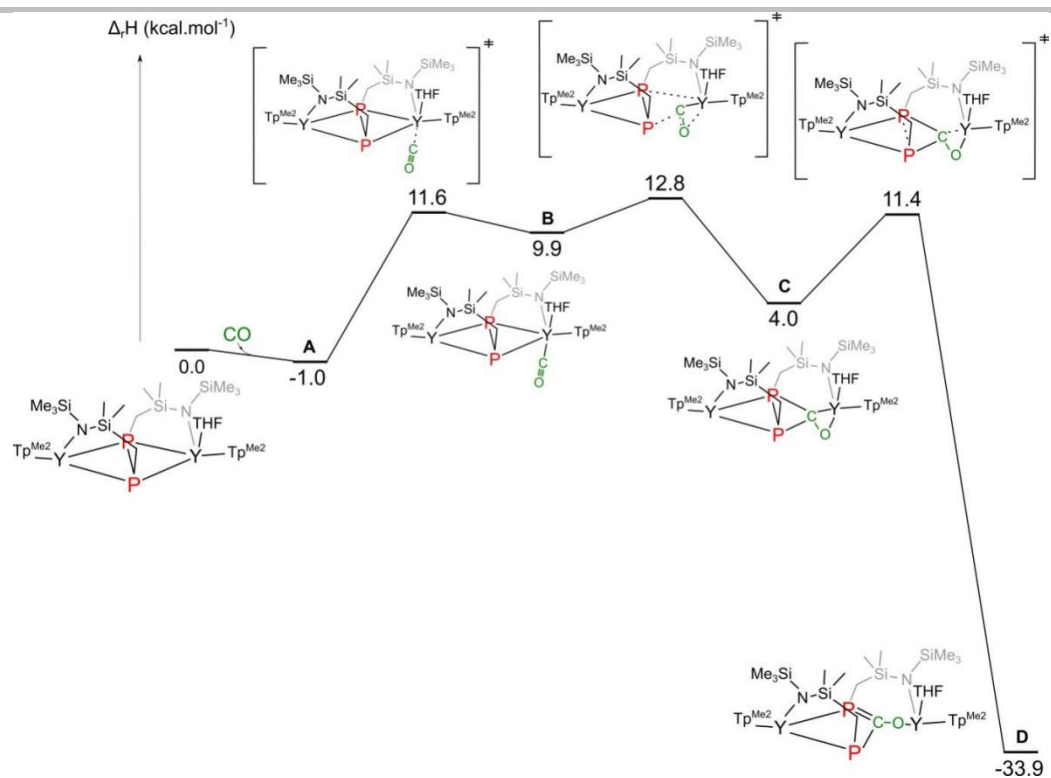

**Figure S35.** Computed enthalpy profile for the CO insertion reaction

**Cartesian coordinates of all optimized structures**

```

2
CO
C -0.99845 -0.42113 -2.23926
O -0.45507 -0.68047 -3.20376
157
CO insertion Y Dimer
C -2.33986 -2.54625 -1.24099
N -2.71743 -1.25926 -1.36408
N -3.61119 -1.20220 -2.39638
C -3.80465 -2.43910 -2.91227
C -3.00665 -3.32001 -2.19758
Y -2.40675 0.66862 0.10718
Si -2.45654 -0.21240 3.45921
C -2.12730 -1.81201 4.44434
B -4.18501 0.12961 -2.93184
N -5.14882 0.79202 -1.92416
N -4.76760 1.08562 -0.65308
C -5.82712 1.64361 -0.04568
C -6.89743 1.72504 -0.94757
C -6.43380 1.16980 -2.13094
C -5.81611 2.05612 1.38963
C -7.16832 0.98900 -3.41854
C -4.73431 -2.74509 -4.04032
C -1.33339 -3.02034 -0.24725
N -3.32897 -0.38536 1.93972
Si -4.63610 -1.58545 1.99707
C -5.83031 -1.61446 0.52050
O -2.91838 3.06375 0.66863
C -2.57374 3.70292 1.91470
C -2.42975 5.17850 1.58283
C -3.52730 5.35992 0.53243
C -3.46096 4.05286 -0.25188

```

---

|    |          |          |          |
|----|----------|----------|----------|
| N  | -2.26680 | 1.69902  | -2.35035 |
| N  | -3.04907 | 1.10311  | -3.29748 |
| C  | -2.74915 | 1.57060  | -4.53404 |
| C  | -1.74616 | 2.51186  | -4.38514 |
| C  | -1.47514 | 2.56454  | -3.00997 |
| C  | -3.41073 | 1.11580  | -5.79376 |
| C  | -0.46308 | 3.45949  | -2.37180 |
| C  | -5.76881 | -1.35260 | 3.52094  |
| C  | -4.03350 | -3.39776 | 2.05127  |
| C  | -0.70260 | 0.47775  | 3.13308  |
| P  | 0.02746  | -0.17123 | 1.52167  |
| P  | 0.39403  | 1.55265  | 0.19749  |
| C  | 1.14864  | 3.03618  | 1.09158  |
| Si | 2.61543  | 2.86146  | 2.32414  |
| C  | 3.52139  | 4.53596  | 2.18154  |
| Y  | 2.70265  | -0.06987 | 0.57902  |
| N  | 3.62154  | 1.47705  | 1.92863  |
| Si | 5.22101  | 1.37474  | 2.67756  |
| C  | 5.94484  | -0.37985 | 2.64155  |
| N  | 3.36779  | -2.18797 | 1.51747  |
| C  | 3.23087  | -2.72371 | 2.74177  |
| C  | 4.02106  | -3.87432 | 2.83625  |
| C  | 4.64757  | -4.00557 | 1.60430  |
| N  | 4.23980  | -2.97615 | 0.82491  |
| C  | 2.37365  | -2.10312 | 3.79290  |
| B  | 4.55903  | -2.74407 | -0.67171 |
| N  | 3.26717  | -2.69253 | -1.51751 |
| N  | 2.41823  | -1.62283 | -1.46176 |
| C  | 1.57878  | -1.73941 | -2.50078 |
| C  | 1.86903  | -2.91205 | -3.21697 |
| C  | 2.94740  | -3.48900 | -2.56952 |
| C  | 5.60007  | -5.06724 | 1.16219  |
| C  | 0.55078  | -0.71039 | -2.82802 |
| C  | 3.66772  | -4.75150 | -2.91241 |
| N  | 4.76967  | -0.21443 | -0.73580 |
| N  | 5.35209  | -1.43017 | -0.92801 |
| C  | 6.51056  | -1.27817 | -1.61800 |
| C  | 6.66907  | 0.07550  | -1.88231 |
| C  | 5.54748  | 0.70388  | -1.32292 |
| C  | 7.41091  | -2.40755 | -1.99663 |
| C  | 5.14298  | 2.14093  | -1.38242 |
| C  | 1.89506  | 2.82260  | 4.08458  |
| C  | -3.28696 | 0.98378  | 4.69423  |
| C  | 6.53704  | 2.46607  | 1.83514  |
| C  | 5.22856  | 1.87357  | 4.51933  |
| H  | -4.80408 | -0.11610 | -3.92609 |
| H  | 5.23185  | -3.66060 | -1.04536 |
| H  | -3.27952 | 0.04169  | -5.95864 |
| H  | -2.96897 | 1.64222  | -6.64322 |
| H  | -4.48639 | 1.31714  | -5.79287 |
| H  | -1.27310 | 3.08851  | -5.16759 |
| H  | -0.65924 | 3.61085  | -1.31072 |
| H  | -0.45373 | 4.42932  | -2.88113 |
| H  | 0.54295  | 3.03270  | -2.44753 |
| H  | -8.18993 | 1.35986  | -3.30678 |
| H  | -7.22075 | -0.06295 | -3.71496 |
| H  | -6.69786 | 1.53855  | -4.23993 |
| H  | -7.88879 | 2.11131  | -0.75671 |
| H  | -5.62251 | 3.12884  | 1.50484  |
| H  | -5.05470 | 1.49899  | 1.94164  |
| H  | -6.79147 | 1.85454  | 1.84259  |

---

|   |          |          |          |
|---|----------|----------|----------|
| H | -5.76311 | -2.45368 | -3.80793 |
| H | -4.72378 | -3.82016 | -4.23417 |
| H | -4.44742 | -2.23091 | -4.96270 |
| H | -2.92131 | -4.38684 | -2.34657 |
| H | -0.31754 | -2.75448 | -0.55622 |
| H | -1.38799 | -4.10845 | -0.15819 |
| H | -1.49665 | -2.57276 | 0.73399  |
| H | 4.70487  | -4.56728 | -3.21036 |
| H | 3.16055  | -5.24291 | -3.74604 |
| H | 3.68788  | -5.44987 | -2.07000 |
| H | 1.36318  | -3.28472 | -4.09634 |
| H | 0.56758  | 0.11008  | -2.10706 |
| H | -0.45677 | -1.13441 | -2.83624 |
| H | 0.73742  | -0.29229 | -3.82364 |
| H | 5.20421  | -5.64950 | 0.32441  |
| H | 5.78853  | -5.75221 | 1.99204  |
| H | 6.55927  | -4.64680 | 0.84574  |
| H | 4.12668  | -4.52800 | 3.69016  |
| H | 2.18894  | -2.81515 | 4.60101  |
| H | 1.41681  | -1.78351 | 3.36967  |
| H | 2.85275  | -1.21667 | 4.22426  |
| H | 7.70359  | -3.00347 | -1.12706 |
| H | 8.31891  | -2.00993 | -2.45579 |
| H | 6.93765  | -3.08466 | -2.71478 |
| H | 7.48735  | 0.54039  | -2.41358 |
| H | 4.50059  | 2.32554  | -2.25201 |
| H | 6.01693  | 2.79095  | -1.47208 |
| H | 4.59547  | 2.42671  | -0.47912 |
| H | -2.78473 | 4.11656  | -1.10591 |
| H | -4.43143 | 3.69867  | -0.60242 |
| H | -4.50236 | 5.47430  | 1.01893  |
| H | -3.36995 | 6.22921  | -0.11156 |
| H | -1.44253 | 5.37861  | 1.15261  |
| H | -2.55853 | 5.81641  | 2.46130  |
| H | -1.65978 | 3.23794  | 2.28785  |
| H | -3.38257 | 3.53279  | 2.63577  |
| H | -6.50763 | -0.75881 | 0.48211  |
| H | -6.43859 | -2.52065 | 0.63487  |
| H | -5.30715 | -1.68352 | -0.43615 |
| H | -5.25914 | -1.53908 | 4.47133  |
| H | -6.60694 | -2.05675 | 3.45585  |
| H | -6.18695 | -0.34110 | 3.55756  |
| H | -4.86898 | -4.03546 | 2.36588  |
| H | -3.20007 | -3.57747 | 2.73238  |
| H | -3.73467 | -3.72467 | 1.05065  |
| H | -3.50134 | 1.95477  | 4.23638  |
| H | -2.62519 | 1.15708  | 5.55143  |
| H | -4.23052 | 0.58188  | 5.07480  |
| H | -3.03468 | -2.34799 | 4.73556  |
| H | -1.59227 | -1.54332 | 5.36346  |
| H | -1.49133 | -2.50070 | 3.87835  |
| H | -0.68035 | 1.57188  | 3.13953  |
| H | -0.07043 | 0.16855  | 3.97494  |
| H | 5.37320  | -1.08574 | 3.25051  |
| H | 6.96054  | -0.33108 | 3.05326  |
| H | 6.01924  | -0.78292 | 1.62787  |
| H | 6.82802  | 2.04618  | 0.86774  |
| H | 7.43531  | 2.49799  | 2.46349  |
| H | 6.20063  | 3.49463  | 1.67819  |
| H | 5.02218  | 2.93720  | 4.67640  |
| H | 6.22224  | 1.66986  | 4.93607  |

---

|   |         |         |         |
|---|---------|---------|---------|
| H | 4.49909 | 1.29799 | 5.09825 |
| H | 4.33478 | 4.63016 | 2.90843 |
| H | 2.81805 | 5.35635 | 2.36934 |
| H | 3.94390 | 4.68020 | 1.18139 |
| H | 1.43169 | 1.85893 | 4.30758 |
| H | 1.13364 | 3.60337 | 4.20204 |
| H | 2.67221 | 3.00528 | 4.83170 |
| H | 1.50193 | 3.68426 | 0.27644 |
| H | 0.37127 | 3.61535 | 1.60807 |

159

CO coordination adduct

|    |          |          |          |
|----|----------|----------|----------|
| C  | -3.56424 | 4.02852  | -0.26843 |
| O  | -2.97742 | 3.05373  | 0.64029  |
| C  | -2.57508 | 3.71275  | 1.85772  |
| C  | -2.41507 | 5.17627  | 1.48417  |
| C  | -3.55788 | 5.35744  | 0.48323  |
| Y  | -2.45125 | 0.65824  | 0.10497  |
| N  | -3.32329 | -0.38878 | 1.96643  |
| Si | -2.42588 | -0.18522 | 3.46704  |
| C  | -0.67897 | 0.50365  | 3.10006  |
| P  | 0.02145  | -0.14028 | 1.47429  |
| P  | 0.34172  | 1.58064  | 0.13440  |
| C  | 1.12469  | 3.07112  | 0.99387  |
| Si | 2.60026  | 2.90518  | 2.21734  |
| N  | 3.60243  | 1.51645  | 1.82564  |
| Si | 5.19992  | 1.40922  | 2.57961  |
| C  | 6.52092  | 2.50428  | 1.74911  |
| Y  | 2.66581  | -0.02433 | 0.47793  |
| N  | 3.32501  | -2.12700 | 1.43961  |
| N  | 4.16321  | -2.95236 | 0.75005  |
| C  | 4.54682  | -3.98256 | 1.54037  |
| C  | 3.93867  | -3.81227 | 2.77713  |
| C  | 3.18369  | -2.63912 | 2.67279  |
| B  | 4.49397  | -2.73374 | -0.74618 |
| N  | 3.20659  | -2.67160 | -1.59773 |
| N  | 2.35583  | -1.60374 | -1.53479 |
| C  | 1.50162  | -1.72728 | -2.56135 |
| C  | 1.78750  | -2.90064 | -3.27813 |
| C  | 2.87637  | -3.47250 | -2.64240 |
| C  | 3.59802  | -4.73196 | -2.99258 |
| C  | 0.46182  | -0.70587 | -2.87472 |
| C  | 2.33966  | -1.98966 | 3.71866  |
| C  | 5.46577  | -5.07670 | 1.10650  |
| N  | 4.73411  | -0.20580 | -0.83234 |
| C  | 5.54543  | 0.69988  | -1.39384 |
| C  | 6.67557  | 0.05325  | -1.91402 |
| C  | 6.48843  | -1.29792 | -1.65191 |
| N  | 5.30529  | -1.43062 | -1.00210 |
| C  | 5.16441  | 2.14266  | -1.46914 |
| C  | 7.38247  | -2.44187 | -1.99944 |
| C  | 1.89157  | 2.88678  | 3.98326  |
| C  | 3.50664  | 4.57733  | 2.05386  |
| N  | -2.38174 | 1.66040  | -2.36625 |
| N  | -3.17686 | 1.04365  | -3.28893 |
| C  | -2.91075 | 1.50155  | -4.53684 |
| C  | -1.91726 | 2.45747  | -4.42059 |
| C  | -1.61677 | 2.52912  | -3.05235 |
| B  | -4.29124 | 0.06052  | -2.88563 |
| N  | -3.68713 | -1.25746 | -2.34844 |
| N  | -2.76828 | -1.29079 | -1.33731 |
| C  | -2.37273 | -2.57166 | -1.20700 |



---

|    |          |          |          |
|----|----------|----------|----------|
| C  | -3.05257 | -3.36532 | -2.13769 |
| C  | -3.87797 | -2.50301 | -2.84401 |
| C  | -3.59437 | 1.02425  | -5.77628 |
| C  | -0.60632 | 3.44530  | -2.44269 |
| C  | -1.33851 | -3.02182 | -0.23078 |
| C  | -4.83046 | -2.83404 | -3.94562 |
| N  | -4.83125 | 1.03652  | -0.60470 |
| N  | -5.23926 | 0.72264  | -1.86245 |
| C  | -6.53344 | 1.08246  | -2.04238 |
| C  | -6.97508 | 1.64662  | -0.85473 |
| C  | -5.88230 | 1.58929  | 0.02178  |
| C  | -5.84030 | 2.01911  | 1.45151  |
| C  | -7.29651 | 0.87759  | -3.30961 |
| Si | -4.61463 | -1.60264 | 2.06415  |
| C  | -5.72705 | -1.35884 | 3.60152  |
| C  | -3.98971 | -3.40650 | 2.13749  |
| C  | -5.83409 | -1.66940 | 0.60913  |
| C  | -3.24395 | 1.02968  | 4.69235  |
| C  | -2.07591 | -1.76363 | 4.48088  |
| C  | 5.19966  | 1.90014  | 4.42337  |
| C  | 5.92425  | -0.34474 | 2.53910  |
| C  | 4.40611  | -0.70785 | -4.73018 |
| O  | 3.85227  | 0.28395  | -4.78297 |
| H  | -4.93106 | -0.20519 | -3.86149 |
| H  | 5.15718  | -3.66061 | -1.11100 |
| H  | -3.45236 | -0.04975 | -5.93276 |
| H  | -3.17913 | 1.54719  | -6.64114 |
| H  | -4.67238 | 1.21125  | -5.75311 |
| H  | -1.46929 | 3.03131  | -5.21967 |
| H  | -0.77247 | 3.58350  | -1.37465 |
| H  | -0.63680 | 4.41820  | -2.94540 |
| H  | 0.40671  | 3.04355  | -2.55452 |
| H  | -8.32000 | 1.23614  | -3.17696 |
| H  | -7.34199 | -0.17814 | -3.59347 |
| H  | -6.85358 | 1.42422  | -4.14809 |
| H  | -7.96620 | 2.02338  | -0.64452 |
| H  | -5.64588 | 3.09341  | 1.55029  |
| H  | -5.06489 | 1.47014  | 1.99218  |
| H  | -6.80470 | 1.82107  | 1.92873  |
| H  | -5.85651 | -2.55010 | -3.69283 |
| H  | -4.81304 | -3.91148 | -4.12529 |
| H  | -4.57075 | -2.32945 | -4.88127 |
| H  | -2.95775 | -4.43285 | -2.27554 |
| H  | -0.33525 | -2.72657 | -0.55314 |
| H  | -1.36258 | -4.11139 | -0.14605 |
| H  | -1.49917 | -2.58320 | 0.75507  |
| H  | 4.63066  | -4.54128 | -3.30128 |
| H  | 3.08465  | -5.22494 | -3.82142 |
| H  | 3.62953  | -5.43053 | -2.15078 |
| H  | 1.27112  | -3.27868 | -4.14907 |
| H  | 0.49220  | 0.12184  | -2.16249 |
| H  | -0.54356 | -1.13467 | -2.85333 |
| H  | 0.62164  | -0.29661 | -3.87838 |
| H  | 5.05116  | -5.65415 | 0.27455  |
| H  | 5.63436  | -5.75972 | 1.94217  |
| H  | 6.43694  | -4.68853 | 0.78520  |
| H  | 4.03675  | -4.45340 | 3.64141  |
| H  | 2.54505  | -2.43452 | 4.69580  |
| H  | 1.27517  | -2.11372 | 3.49667  |
| H  | 2.53513  | -0.91430 | 3.77928  |
| H  | 7.63992  | -3.03853 | -1.11936 |

---

|   |          |          |          |
|---|----------|----------|----------|
| H | 8.30966  | -2.05984 | -2.43267 |
| H | 6.91913  | -3.11291 | -2.72944 |
| H | 7.51822  | 0.50433  | -2.41850 |
| H | 4.53116  | 2.32967  | -2.34466 |
| H | 6.04971  | 2.77704  | -1.55846 |
| H | 4.61581  | 2.44570  | -0.57206 |
| H | -2.94626 | 4.05454  | -1.16728 |
| H | -4.56248 | 3.68490  | -0.54411 |
| H | -4.50458 | 5.50971  | 1.01343  |
| H | -3.41148 | 6.20545  | -0.19096 |
| H | -1.44556 | 5.34175  | 1.00231  |
| H | -2.48735 | 5.83813  | 2.35132  |
| H | -1.65736 | 3.23658  | 2.20710  |
| H | -3.35989 | 3.57605  | 2.61211  |
| H | -6.52162 | -0.82189 | 0.56965  |
| H | -6.43016 | -2.58012 | 0.74909  |
| H | -5.32792 | -1.74786 | -0.35594 |
| H | -5.20029 | -1.51605 | 4.54780  |
| H | -6.55299 | -2.07916 | 3.56357  |
| H | -6.16328 | -0.35457 | 3.62366  |
| H | -4.81470 | -4.04984 | 2.46778  |
| H | -3.14886 | -3.56658 | 2.81426  |
| H | -3.69503 | -3.74338 | 1.13904  |
| H | -3.47135 | 1.99065  | 4.21977  |
| H | -2.57132 | 1.22282  | 5.53678  |
| H | -4.17957 | 0.62882  | 5.09360  |
| H | -2.97632 | -2.29459 | 4.80118  |
| H | -1.52454 | -1.47316 | 5.38357  |
| H | -1.44980 | -2.46507 | 3.91947  |
| H | -0.65881 | 1.59772  | 3.10717  |
| H | -0.02659 | 0.19330  | 3.92591  |
| H | 5.35391  | -1.05031 | 3.14954  |
| H | 6.94131  | -0.29566 | 2.94741  |
| H | 5.99492  | -0.74737 | 1.52502  |
| H | 6.82553  | 2.08353  | 0.78634  |
| H | 7.41131  | 2.54016  | 2.38838  |
| H | 6.18354  | 3.53152  | 1.58599  |
| H | 5.00170  | 2.96500  | 4.58323  |
| H | 6.18886  | 1.68603  | 4.84552  |
| H | 4.46149  | 1.32805  | 4.99468  |
| H | 4.32181  | 4.67836  | 2.77794  |
| H | 2.80441  | 5.40023  | 2.23463  |
| H | 3.92683  | 4.71045  | 1.05122  |
| H | 1.43229  | 1.92559  | 4.22445  |
| H | 1.12822  | 3.66676  | 4.09362  |
| H | 2.67254  | 3.08362  | 4.72268  |
| H | 1.47655  | 3.70054  | 0.16363  |
| H | 0.36022  | 3.66861  | 1.50859  |

159

CO coordiantion TS

|   |         |          |          |
|---|---------|----------|----------|
| C | 5.38707 | 0.57632  | -1.60154 |
| N | 4.86389 | -0.41458 | -0.86727 |
| N | 5.84187 | -1.34326 | -0.67439 |
| C | 6.98358 | -0.93770 | -1.28252 |
| C | 6.72771 | 0.28783  | -1.88502 |
| Y | 2.83346 | -0.54154 | 0.46832  |
| N | 3.11220 | -2.79536 | -0.85367 |
| N | 4.35778 | -3.34911 | -0.89206 |
| C | 4.35999 | -4.47225 | -1.65059 |
| C | 3.07104 | -4.65529 | -2.11850 |
| C | 2.32621 | -3.58854 | -1.59364 |

---

|    |          |          |          |
|----|----------|----------|----------|
| B  | 5.51840  | -2.74722 | -0.09047 |
| N  | 5.13382  | -2.73902 | 1.41429  |
| N  | 4.02304  | -2.09896 | 1.87443  |
| C  | 3.88387  | -2.41151 | 3.17046  |
| C  | 4.91917  | -3.27074 | 3.55454  |
| C  | 5.69408  | -3.45775 | 2.41612  |
| C  | 2.76453  | -1.85948 | 3.99015  |
| C  | 6.92916  | -4.28354 | 2.26727  |
| C  | 0.87523  | -3.33236 | -1.78811 |
| C  | 5.56877  | -5.31454 | -1.89449 |
| C  | 8.25852  | -1.71469 | -1.26801 |
| C  | 4.56825  | 1.75909  | -2.00398 |
| P  | 0.02679  | -0.84648 | 0.98722  |
| P  | 0.41631  | 0.83715  | -0.40960 |
| C  | 1.02959  | 2.41005  | 0.44506  |
| Si | 2.33765  | 2.52239  | 1.83767  |
| C  | 1.52087  | 2.53689  | 3.55905  |
| Y  | -2.53709 | 0.44833  | -0.27133 |
| N  | -2.59153 | 1.83864  | -2.56567 |
| N  | -3.64615 | 1.60984  | -3.40385 |
| C  | -3.44984 | 2.21312  | -4.60090 |
| C  | -2.23036 | 2.86444  | -4.53820 |
| C  | -1.72816 | 2.60744  | -3.25608 |
| B  | -4.91913 | 0.87891  | -2.93984 |
| N  | -5.49375 | 1.55531  | -1.68125 |
| N  | -4.87650 | 1.47608  | -0.46982 |
| C  | -5.68138 | 2.09448  | 0.41078  |
| C  | -6.81180 | 2.59673  | -0.24898 |
| C  | -6.66401 | 2.23099  | -1.57671 |
| C  | -5.41545 | 2.14369  | 1.87828  |
| C  | -7.58963 | 2.49555  | -2.71847 |
| C  | -4.40651 | 2.15052  | -5.74632 |
| C  | -0.41836 | 3.09511  | -2.73552 |
| N  | -3.64877 | -1.04159 | -1.85489 |
| C  | -3.57752 | -2.37741 | -1.96957 |
| C  | -4.53888 | -2.82035 | -2.88602 |
| C  | -5.18942 | -1.67891 | -3.32972 |
| N  | -4.63314 | -0.61788 | -2.69609 |
| C  | -2.54784 | -3.18756 | -1.26223 |
| C  | -6.30955 | -1.57840 | -4.31202 |
| N  | -3.42735 | -0.65529 | 1.54152  |
| Si | -4.92449 | -1.60981 | 1.66431  |
| C  | -4.67777 | -3.48188 | 1.36456  |
| O  | -2.43802 | 2.83847  | 0.66564  |
| C  | -2.15075 | 3.27096  | 2.01956  |
| C  | -2.19411 | 4.79455  | 1.99548  |
| C  | -3.18195 | 5.07800  | 0.86292  |
| C  | -2.84003 | 3.98354  | -0.13398 |
| C  | -0.80437 | -0.57144 | -2.95731 |
| O  | -0.30274 | -0.44561 | -3.97329 |
| Si | -2.39997 | -0.81633 | 2.96774  |
| C  | -2.97281 | 0.17894  | 4.49691  |
| C  | -2.09422 | -2.59701 | 3.57023  |
| C  | -0.66780 | -0.13680 | 2.58481  |
| C  | -6.33008 | -1.16377 | 0.46749  |
| C  | -5.74384 | -1.48970 | 3.38926  |
| C  | 2.97254  | 4.31171  | 1.60853  |
| N  | 3.54006  | 1.25829  | 1.63893  |
| Si | 5.13237  | 1.62345  | 2.33338  |
| C  | 5.02122  | 2.36312  | 4.09052  |
| C  | 6.27779  | 0.12924  | 2.53833  |

---

|   |          |          |          |
|---|----------|----------|----------|
| C | 6.14337  | 2.84549  | 1.27662  |
| H | -5.73559 | 0.95780  | -3.81140 |
| H | 6.49262  | -3.43066 | -0.21719 |
| H | -4.59012 | 1.12051  | -6.06722 |
| H | -3.98862 | 2.69727  | -6.59494 |
| H | -5.37622 | 2.59468  | -5.50128 |
| H | -1.76161 | 3.44670  | -5.31885 |
| H | -0.41794 | 3.18832  | -1.65071 |
| H | -0.18365 | 4.06819  | -3.17896 |
| H | 0.39143  | 2.40348  | -2.99277 |
| H | -8.45406 | 3.05873  | -2.35891 |
| H | -7.95408 | 1.56945  | -3.17317 |
| H | -7.10955 | 3.08211  | -3.50808 |
| H | -7.64394 | 3.12944  | 0.18952  |
| H | -5.13807 | 3.14857  | 2.21325  |
| H | -4.62932 | 1.43535  | 2.14801  |
| H | -6.32222 | 1.86650  | 2.42561  |
| H | -7.19783 | -1.11752 | -3.86936 |
| H | -6.58265 | -2.58045 | -4.65066 |
| H | -6.03520 | -0.98662 | -5.19064 |
| H | -4.73612 | -3.83890 | -3.18816 |
| H | -1.69557 | -3.35598 | -1.92504 |
| H | -2.94738 | -4.16469 | -0.98101 |
| H | -2.17800 | -2.69265 | -0.35933 |
| H | 6.37149  | -4.74732 | -2.37625 |
| H | 5.30394  | -6.14694 | -2.55061 |
| H | 5.97310  | -5.73180 | -0.96683 |
| H | 2.71471  | -5.45664 | -2.75007 |
| H | 0.48974  | -2.61987 | -1.05451 |
| H | 0.31782  | -4.26711 | -1.67419 |
| H | 0.67246  | -2.94863 | -2.79356 |
| H | 6.78503  | -5.11418 | 1.56931  |
| H | 7.20288  | -4.70279 | 3.23818  |
| H | 7.77355  | -3.69065 | 1.90371  |
| H | 5.09007  | -3.69815 | 4.53217  |
| H | 2.89089  | -2.13096 | 5.04098  |
| H | 1.79761  | -2.24515 | 3.64992  |
| H | 2.73409  | -0.76671 | 3.91881  |
| H | 8.58883  | -1.93277 | -0.24800 |
| H | 9.04234  | -1.13475 | -1.76058 |
| H | 8.16228  | -2.66995 | -1.79345 |
| H | 7.42419  | 0.88921  | -2.45156 |
| H | 3.75555  | 1.46814  | -2.67881 |
| H | 5.18784  | 2.49751  | -2.51817 |
| H | 4.12468  | 2.23774  | -1.12440 |
| H | -1.99583 | 4.27475  | -0.76602 |
| H | -3.66989 | 3.67165  | -0.76721 |
| H | -4.21540 | 4.97734  | 1.20893  |
| H | -3.06528 | 6.07515  | 0.42964  |
| H | -1.20734 | 5.20323  | 1.75135  |
| H | -2.50228 | 5.20943  | 2.95885  |
| H | -1.17595 | 2.87758  | 2.31092  |
| H | -2.91185 | 2.85030  | 2.68134  |
| H | -6.81340 | -0.21241 | 0.70045  |
| H | -7.08299 | -1.95620 | 0.56655  |
| H | -6.00612 | -1.13826 | -0.57466 |
| H | -5.15753 | -1.96566 | 4.18113  |
| H | -6.70987 | -2.00724 | 3.34453  |
| H | -5.93560 | -0.45392 | 3.68617  |
| H | -5.45837 | -4.03485 | 1.90075  |
| H | -3.70818 | -3.85589 | 1.69944  |

---

|   |          |          |          |
|---|----------|----------|----------|
| H | -4.78877 | -3.71128 | 0.30100  |
| H | -3.22871 | 1.21123  | 4.23604  |
| H | -2.15191 | 0.21709  | 5.22360  |
| H | -3.83889 | -0.26003 | 4.99789  |
| H | -3.00437 | -3.11610 | 3.88322  |
| H | -1.41800 | -2.56585 | 4.43322  |
| H | -1.61276 | -3.19186 | 2.78695  |
| H | -0.66951 | 0.95503  | 2.54396  |
| H | -0.01368 | -0.39969 | 3.42509  |
| H | 5.88676  | -0.61525 | 3.23661  |
| H | 7.22709  | 0.50360  | 2.94118  |
| H | 6.49106  | -0.36483 | 1.58816  |
| H | 6.38564  | 2.40107  | 0.30599  |
| H | 7.09091  | 3.06204  | 1.78488  |
| H | 5.63243  | 3.79566  | 1.10389  |
| H | 4.55164  | 3.35051  | 4.12789  |
| H | 6.03522  | 2.47013  | 4.49390  |
| H | 4.46697  | 1.69895  | 4.76244  |
| H | 3.70209  | 4.61604  | 2.36447  |
| H | 2.12005  | 4.99861  | 1.68386  |
| H | 3.42522  | 4.45618  | 0.62209  |
| H | 1.08722  | 1.57214  | 3.83056  |
| H | 0.73054  | 3.29590  | 3.61037  |
| H | 2.26478  | 2.79539  | 4.31843  |
| H | 1.49504  | 2.96944  | -0.37970 |
| H | 0.16987  | 3.01947  | 0.74941  |

159

CO coordination product

|    |          |          |          |
|----|----------|----------|----------|
| C  | -3.66466 | -2.34309 | -2.09722 |
| N  | -3.72965 | -1.01198 | -1.93317 |
| N  | -4.72044 | -0.55469 | -2.74636 |
| C  | -5.29331 | -1.59031 | -3.40767 |
| C  | -4.64366 | -2.74978 | -3.01226 |
| Y  | -2.52986 | 0.43625  | -0.33300 |
| Si | -2.40714 | -0.87818 | 2.91744  |
| C  | -2.06274 | -2.66521 | 3.48067  |
| B  | -4.97487 | 0.95340  | -2.95419 |
| N  | -5.50855 | 1.61519  | -1.67189 |
| N  | -4.87879 | 1.48519  | -0.47097 |
| C  | -5.66675 | 2.08244  | 0.43892  |
| C  | -6.79748 | 2.62266  | -0.19015 |
| C  | -6.66878 | 2.30222  | -1.53102 |
| C  | -5.39094 | 2.07212  | 1.90514  |
| C  | -7.60313 | 2.61910  | -2.65216 |
| C  | -6.42796 | -1.44843 | -4.36781 |
| C  | -2.62349 | -3.18294 | -1.43890 |
| N  | -3.41442 | -0.71460 | 1.47944  |
| Si | -4.90592 | -1.67787 | 1.58317  |
| C  | -6.32388 | -1.19529 | 0.41539  |
| O  | -2.41492 | 2.82016  | 0.65509  |
| C  | -2.15429 | 3.24824  | 2.01602  |
| C  | -2.24850 | 4.77077  | 2.00858  |
| C  | -3.20960 | 5.03861  | 0.84970  |
| C  | -2.80173 | 3.96708  | -0.14652 |
| C  | -1.00192 | -0.42510 | -2.24009 |
| O  | -0.45631 | -0.68871 | -3.21141 |
| N  | -2.61811 | 1.86322  | -2.61487 |
| N  | -3.69331 | 1.66271  | -3.43348 |
| C  | -3.50033 | 2.25923  | -4.63432 |
| C  | -2.26091 | 2.87460  | -4.59473 |
| C  | -1.74354 | 2.60440  | -3.32184 |

---

|    |          |          |          |
|----|----------|----------|----------|
| C  | -4.47885 | 2.22693  | -5.76234 |
| C  | -0.41282 | 3.05647  | -2.82092 |
| C  | -5.72415 | -1.61631 | 3.31301  |
| C  | -4.65315 | -3.54244 | 1.23958  |
| C  | -0.68720 | -0.13875 | 2.58896  |
| P  | 0.06098  | -0.78621 | 0.99546  |
| P  | 0.48844  | 0.90869  | -0.36182 |
| C  | 1.04754  | 2.49442  | 0.48648  |
| Si | 2.36814  | 2.56934  | 1.86850  |
| C  | 2.99566  | 4.36645  | 1.68527  |
| Y  | 2.87267  | -0.52624 | 0.50578  |
| N  | 3.56988  | 1.30912  | 1.63048  |
| Si | 5.17593  | 1.68663  | 2.28802  |
| C  | 6.34369  | 0.20460  | 2.45493  |
| N  | 4.07976  | -2.04893 | 1.93230  |
| C  | 3.96788  | -2.32689 | 3.23881  |
| C  | 5.01207  | -3.17476 | 3.62367  |
| C  | 5.76271  | -3.39217 | 2.47412  |
| N  | 5.18059  | -2.70110 | 1.46542  |
| C  | 2.86287  | -1.75554 | 4.06513  |
| B  | 5.52785  | -2.75535 | -0.04858 |
| N  | 4.34718  | -3.38009 | -0.80159 |
| N  | 3.10044  | -2.82749 | -0.74819 |
| C  | 2.29276  | -3.65929 | -1.42127 |
| C  | 3.02488  | -4.74848 | -1.91693 |
| C  | 4.32806  | -4.53958 | -1.50323 |
| C  | 6.99462  | -4.22188 | 2.32114  |
| C  | 0.83587  | -3.41698 | -1.59437 |
| C  | 5.53085  | -5.39017 | -1.74830 |
| N  | 4.86886  | -0.43645 | -0.86752 |
| N  | 5.84332  | -1.36990 | -0.67932 |
| C  | 6.97534  | -0.98261 | -1.31623 |
| C  | 6.71677  | 0.23580  | -1.93238 |
| C  | 5.38464  | 0.53952  | -1.62725 |
| C  | 8.24461  | -1.76890 | -1.31577 |
| C  | 4.56505  | 1.72030  | -2.03401 |
| C  | 1.55780  | 2.51751  | 3.59060  |
| C  | -3.01126 | 0.07228  | 4.46373  |
| C  | 6.14734  | 2.92323  | 1.21157  |
| C  | 5.10126  | 2.40578  | 4.05589  |
| H  | -5.80552 | 1.06918  | -3.80812 |
| H  | 6.49728  | -3.44488 | -0.17767 |
| H  | -4.69036 | 1.20391  | -6.08846 |
| H  | -4.06463 | 2.77187  | -6.61395 |
| H  | -5.43401 | 2.68956  | -5.49562 |
| H  | -1.79119 | 3.44496  | -5.38356 |
| H  | -0.39722 | 3.15446  | -1.73630 |
| H  | -0.15732 | 4.02101  | -3.27116 |
| H  | 0.37547  | 2.34311  | -3.08546 |
| H  | -8.44850 | 3.19307  | -2.26529 |
| H  | -7.99661 | 1.71449  | -3.12577 |
| H  | -7.12001 | 3.21480  | -3.43300 |
| H  | -7.61757 | 3.15043  | 0.27618  |
| H  | -5.11991 | 3.06424  | 2.28104  |
| H  | -4.59983 | 1.35699  | 2.13963  |
| H  | -6.29239 | 1.76499  | 2.44550  |
| H  | -7.30139 | -0.98613 | -3.89792 |
| H  | -6.72170 | -2.43726 | -4.72741 |
| H  | -6.16003 | -0.83821 | -5.23583 |
| H  | -4.85253 | -3.75663 | -3.34434 |
| H  | -1.76263 | -3.29653 | -2.10426 |

---

|   |          |          |          |
|---|----------|----------|----------|
| H | -3.01004 | -4.18275 | -1.22740 |
| H | -2.27093 | -2.74746 | -0.49962 |
| H | 6.31838  | -4.84182 | -2.27480 |
| H | 5.24839  | -6.24760 | -2.36358 |
| H | 5.96270  | -5.77129 | -0.81745 |
| H | 2.65062  | -5.57973 | -2.49741 |
| H | 0.45132  | -2.71999 | -0.84509 |
| H | 0.28916  | -4.35930 | -1.49200 |
| H | 0.62074  | -3.01484 | -2.58977 |
| H | 6.83475  | -5.07275 | 1.65157  |
| H | 7.29127  | -4.61224 | 3.29732  |
| H | 7.82970  | -3.63988 | 1.92047  |
| H | 5.20398  | -3.57630 | 4.60834  |
| H | 3.00610  | -2.00449 | 5.11931  |
| H | 1.89009  | -2.14843 | 3.75055  |
| H | 2.83117  | -0.66454 | 3.97142  |
| H | 8.59882  | -1.96674 | -0.29965 |
| H | 9.01993  | -1.20610 | -1.84056 |
| H | 8.12800  | -2.73474 | -1.81713 |
| H | 7.40632  | 0.82226  | -2.52255 |
| H | 3.75640  | 1.42649  | -2.71234 |
| H | 5.18548  | 2.45991  | -2.54551 |
| H | 4.11516  | 2.19767  | -1.15696 |
| H | -1.93564 | 4.28479  | -0.73649 |
| H | -3.59607 | 3.64789  | -0.82027 |
| H | -4.24983 | 4.89875  | 1.15983  |
| H | -3.11090 | 6.04455  | 0.43250  |
| H | -1.26895 | 5.21453  | 1.79920  |
| H | -2.59838 | 5.16290  | 2.96725  |
| H | -1.16856 | 2.88769  | 2.31425  |
| H | -2.90523 | 2.79325  | 2.66595  |
| H | -6.79741 | -0.24819 | 0.68406  |
| H | -7.08059 | -1.98553 | 0.50209  |
| H | -6.01481 | -1.13963 | -0.62962 |
| H | -5.13642 | -2.11237 | 4.09143  |
| H | -6.68519 | -2.14106 | 3.24833  |
| H | -5.92726 | -0.59237 | 3.64165  |
| H | -5.41340 | -4.11298 | 1.78637  |
| H | -3.67124 | -3.91076 | 1.54469  |
| H | -4.78802 | -3.75776 | 0.17598  |
| H | -3.27496 | 1.10814  | 4.22511  |
| H | -2.19655 | 0.10171  | 5.19784  |
| H | -3.87646 | -0.38736 | 4.94647  |
| H | -2.96460 | -3.21559 | 3.76287  |
| H | -1.40162 | -2.64323 | 4.35548  |
| H | -1.55460 | -3.22595 | 2.68887  |
| H | -0.72532 | 0.95304  | 2.57502  |
| H | -0.04280 | -0.40508 | 3.43569  |
| H | 5.98568  | -0.54112 | 3.16947  |
| H | 7.30161  | 0.59154  | 2.82411  |
| H | 6.53122  | -0.29067 | 1.49999  |
| H | 6.37128  | 2.48178  | 0.23510  |
| H | 7.10428  | 3.15021  | 1.69699  |
| H | 5.62153  | 3.86725  | 1.05119  |
| H | 4.59803  | 3.37453  | 4.12482  |
| H | 6.12428  | 2.54319  | 4.42603  |
| H | 4.59506  | 1.71305  | 4.73715  |
| H | 3.73848  | 4.65390  | 2.43455  |
| H | 2.14092  | 5.04556  | 1.79655  |
| H | 3.42718  | 4.54125  | 0.69428  |
| H | 1.10186  | 1.54927  | 3.80839  |

---

|   |         |         |          |
|---|---------|---------|----------|
| H | 0.78572 | 3.29060 | 3.68722  |
| H | 2.31090 | 2.71399 | 4.35969  |
| H | 1.49831 | 3.06762 | -0.33695 |
| H | 0.17688 | 3.07988 | 0.80311  |

159

CO insertion TS

|    |          |          |          |
|----|----------|----------|----------|
| C  | 3.59748  | -2.30269 | 3.28235  |
| N  | 3.91406  | -2.13054 | 1.99154  |
| N  | 4.98780  | -2.92462 | 1.72283  |
| C  | 5.34709  | -3.59990 | 2.84079  |
| C  | 4.47740  | -3.22637 | 3.85798  |
| Y  | 3.23280  | -0.47151 | 0.36903  |
| N  | 5.46723  | -0.70097 | -0.56904 |
| N  | 6.20844  | -1.80645 | -0.27811 |
| C  | 7.45399  | -1.66796 | -0.79636 |
| C  | 7.50871  | -0.43955 | -1.44251 |
| C  | 6.23787  | 0.12901  | -1.28358 |
| B  | 5.54112  | -3.09709 | 0.28249  |
| N  | 4.40492  | -3.50467 | -0.67228 |
| N  | 3.38674  | -2.64624 | -0.96679 |
| C  | 2.63771  | -3.24180 | -1.90516 |
| C  | 3.17147  | -4.50254 | -2.20884 |
| C  | 4.29423  | -4.63770 | -1.40785 |
| C  | 5.24469  | -5.78652 | -1.32181 |
| C  | 1.43667  | -2.59074 | -2.50054 |
| C  | 5.69698  | 1.41148  | -1.82702 |
| C  | 8.53224  | -2.69188 | -0.66091 |
| C  | 6.48397  | -4.56579 | 2.90589  |
| C  | 2.48236  | -1.53768 | 3.91295  |
| P  | 0.33446  | -0.62015 | 0.40908  |
| P  | 1.16755  | 0.92137  | -0.96644 |
| C  | 1.31698  | 2.54901  | -0.04106 |
| Si | 2.63907  | 2.79656  | 1.33684  |
| C  | 1.68679  | 3.15201  | 2.95234  |
| Y  | -2.87572 | 0.63846  | -0.48744 |
| N  | -3.28509 | -0.72557 | 1.26154  |
| Si | -4.57322 | -1.92581 | 1.49404  |
| C  | -5.15993 | -2.02510 | 3.30903  |
| O  | -2.70244 | 2.99884  | 0.50112  |
| C  | -2.23968 | 3.44131  | 1.80931  |
| C  | -2.48401 | 4.94412  | 1.86270  |
| C  | -3.67955 | 5.11773  | 0.92736  |
| C  | -3.36935 | 4.11181  | -0.16667 |
| C  | -0.90478 | 0.36313  | -2.09638 |
| O  | -0.68126 | -0.15087 | -3.12369 |
| N  | -3.24658 | 2.14016  | -2.58353 |
| N  | -4.36920 | 1.95335  | -3.33256 |
| C  | -4.29970 | 2.67181  | -4.48004 |
| C  | -3.09360 | 3.35270  | -4.46914 |
| C  | -2.46385 | 2.98738  | -3.27119 |
| B  | -5.49514 | 1.00690  | -2.87487 |
| N  | -6.02370 | 1.44718  | -1.49216 |
| N  | -5.24560 | 1.38595  | -0.37758 |
| C  | -6.00140 | 1.81000  | 0.65055  |
| C  | -7.27463 | 2.15956  | 0.18427  |
| C  | -7.25599 | 1.91278  | -1.18110 |
| C  | -5.36062 | 2.67940  | -5.53122 |
| C  | -1.11699 | 3.43112  | -2.80284 |
| C  | -8.35777 | 2.09893  | -2.17179 |
| C  | -5.51225 | 1.83519  | 2.06022  |
| N  | -3.86400 | -0.80562 | -2.14614 |



---

|    |          |          |          |
|----|----------|----------|----------|
| N  | -4.98248 | -0.45016 | -2.84234 |
| C  | -5.41354 | -1.49778 | -3.58552 |
| C  | -4.54394 | -2.55527 | -3.36596 |
| C  | -3.58060 | -2.07868 | -2.46833 |
| C  | -2.36392 | -2.78449 | -1.97482 |
| C  | -6.62136 | -1.46094 | -4.46248 |
| C  | -0.54045 | 0.28827  | 1.80726  |
| Si | -2.01363 | -0.72378 | 2.48391  |
| C  | -2.51104 | 0.13140  | 4.11804  |
| C  | -1.33949 | -2.43244 | 2.96184  |
| C  | -4.05922 | -3.69500 | 1.00825  |
| C  | -6.15069 | -1.59812 | 0.49055  |
| N  | 3.76158  | 1.44938  | 1.45219  |
| Si | 5.25624  | 1.73121  | 2.35997  |
| C  | 6.56776  | 2.72537  | 1.39791  |
| C  | 3.46452  | 4.45736  | 0.88046  |
| C  | 4.99415  | 2.66878  | 4.00324  |
| C  | 6.14232  | 0.13072  | 2.86312  |
| H  | -6.39693 | 1.07244  | -3.65915 |
| H  | 6.36932  | -3.96108 | 0.30793  |
| H  | -5.49907 | 1.68898  | -5.97643 |
| H  | -5.07421 | 3.36805  | -6.32948 |
| H  | -6.32993 | 3.00019  | -5.13761 |
| H  | -2.71608 | 4.01795  | -5.23272 |
| H  | -0.95067 | 3.20749  | -1.74809 |
| H  | -0.99405 | 4.50886  | -2.95617 |
| H  | -0.32331 | 2.92422  | -3.36117 |
| H  | -9.24561 | 2.47624  | -1.65917 |
| H  | -8.62494 | 1.16009  | -2.66595 |
| H  | -8.08801 | 2.81582  | -2.95347 |
| H  | -8.10962 | 2.52209  | 0.76698  |
| H  | -5.19349 | 2.83741  | 2.36580  |
| H  | -4.67820 | 1.13952  | 2.18681  |
| H  | -6.31533 | 1.53397  | 2.73944  |
| H  | -7.52368 | -1.20088 | -3.90064 |
| H  | -6.77321 | -2.44612 | -4.90910 |
| H  | -6.51738 | -0.73382 | -5.27369 |
| H  | -4.59708 | -3.54092 | -3.80556 |
| H  | -1.54916 | -2.65562 | -2.69324 |
| H  | -2.55502 | -3.85512 | -1.86685 |
| H  | -2.01653 | -2.39497 | -1.01382 |
| H  | 6.26138  | -5.50254 | -1.61203 |
| H  | 4.91302  | -6.58207 | -1.99313 |
| H  | 5.29580  | -6.19965 | -0.30940 |
| H  | 2.79052  | -5.22062 | -2.92102 |
| H  | 0.67084  | -2.40407 | -1.74092 |
| H  | 1.00841  | -3.22999 | -3.27661 |
| H  | 1.68112  | -1.62587 | -2.95486 |
| H  | 6.33164  | -5.42316 | 2.24313  |
| H  | 6.58331  | -4.94012 | 3.92732  |
| H  | 7.43145  | -4.09679 | 2.62381  |
| H  | 4.48547  | -3.58020 | 4.87899  |
| H  | 2.09017  | -2.07218 | 4.78201  |
| H  | 1.66733  | -1.39187 | 3.19670  |
| H  | 2.81954  | -0.54946 | 4.24647  |
| H  | 8.72308  | -2.94463 | 0.38633  |
| H  | 9.45860  | -2.30284 | -1.08968 |
| H  | 8.28152  | -3.62087 | -1.18258 |
| H  | 8.35813  | -0.01796 | -1.96077 |
| H  | 5.14433  | 1.23822  | -2.75768 |
| H  | 6.50553  | 2.11436  | -2.04251 |

---

|   |          |          |          |
|---|----------|----------|----------|
| H | 5.01623  | 1.88111  | -1.11007 |
| H | -2.67843 | 4.52843  | -0.90516 |
| H | -4.24367 | 3.71451  | -0.67969 |
| H | -4.61573 | 4.86404  | 1.43489  |
| H | -3.77331 | 6.13236  | 0.53083  |
| H | -1.61493 | 5.48750  | 1.47640  |
| H | -2.67154 | 5.28907  | 2.88285  |
| H | -1.18559 | 3.18141  | 1.91667  |
| H | -2.81517 | 2.90461  | 2.56879  |
| H | -6.69911 | -0.71693 | 0.83239  |
| H | -6.80227 | -2.47161 | 0.61735  |
| H | -5.94908 | -1.48368 | -0.57735 |
| H | -4.39329 | -2.41447 | 3.98605  |
| H | -6.01904 | -2.70419 | 3.36488  |
| H | -5.48233 | -1.04987 | 3.68776  |
| H | -4.76795 | -4.41047 | 1.44234  |
| H | -3.05648 | -3.96116 | 1.35027  |
| H | -4.09280 | -3.81724 | -0.07773 |
| H | -2.92277 | 1.13258  | 3.95266  |
| H | -1.62878 | 0.23857  | 4.76064  |
| H | -3.25755 | -0.44432 | 4.67212  |
| H | -2.10945 | -3.07629 | 3.39692  |
| H | -0.54763 | -2.31501 | 3.70979  |
| H | -0.91077 | -2.94090 | 2.09314  |
| H | -0.87534 | 1.28122  | 1.47646  |
| H | 0.13386  | 0.50097  | 2.64564  |
| H | 5.56817  | -0.46845 | 3.57529  |
| H | 7.08435  | 0.41485  | 3.34827  |
| H | 6.38829  | -0.49973 | 2.00495  |
| H | 6.98692  | 2.12831  | 0.58245  |
| H | 7.39172  | 2.98005  | 2.07554  |
| H | 6.17891  | 3.65685  | 0.97836  |
| H | 4.67862  | 3.70721  | 3.86213  |
| H | 5.94483  | 2.68803  | 4.54944  |
| H | 4.25522  | 2.17144  | 4.64025  |
| H | 4.16692  | 4.80632  | 1.64369  |
| H | 2.69263  | 5.22859  | 0.76667  |
| H | 4.00489  | 4.38610  | -0.06979 |
| H | 1.11048  | 2.28487  | 3.28721  |
| H | 0.99128  | 3.98672  | 2.79792  |
| H | 2.36163  | 3.43639  | 3.76359  |
| H | 1.55442  | 3.28075  | -0.82576 |
| H | 0.34165  | 2.85703  | 0.36013  |

159

CO insertion product

|    |          |          |          |
|----|----------|----------|----------|
| Y  | -2.90800 | 0.64044  | -0.48762 |
| Y  | 3.41472  | -0.22007 | 0.53744  |
| B  | -5.46751 | 0.50629  | -2.99969 |
| H  | -6.32492 | 0.43091  | -3.83346 |
| B  | 5.16875  | -3.09303 | -0.14993 |
| H  | 5.80621  | -4.08646 | -0.34340 |
| P  | 0.51394  | -0.20906 | 1.00467  |
| P  | 1.26075  | 1.41215  | -0.34418 |
| Si | -4.28696 | -1.85058 | 1.81758  |
| Si | -2.00028 | -0.33780 | 2.88648  |
| Si | 5.48537  | 1.61563  | 2.73062  |
| Si | 2.92945  | 2.98303  | 1.90899  |
| O  | -0.98801 | 0.10768  | -1.41176 |
| O  | -3.12981 | 3.08860  | 0.15560  |
| N  | -4.41263 | 1.53825  | -3.46453 |
| N  | -3.30888 | 1.79199  | -2.71412 |

---

|   |          |          |          |
|---|----------|----------|----------|
| N | -6.11976 | 0.96689  | -1.67600 |
| N | -5.38526 | 1.15403  | -0.54840 |
| N | -4.80031 | -0.88265 | -2.85750 |
| N | -3.71557 | -1.07938 | -2.05648 |
| N | 3.96206  | -3.07074 | -1.11342 |
| N | 3.20454  | -1.94370 | -1.29389 |
| N | 4.70386  | -3.11317 | 1.32892  |
| N | 3.86710  | -2.16377 | 1.83492  |
| N | 6.07593  | -1.86726 | -0.47414 |
| N | 5.57232  | -0.59992 | -0.48723 |
| N | -3.08105 | -0.58308 | 1.52778  |
| N | 3.98017  | 1.56524  | 1.78514  |
| C | -5.38101 | 2.11907  | -5.71489 |
| H | -5.48345 | 1.10846  | -6.12329 |
| H | -5.10968 | 2.78664  | -6.53631 |
| H | -6.36461 | 2.42179  | -5.34270 |
| C | -4.33405 | 2.18821  | -4.65180 |
| C | -3.13507 | 2.88704  | -4.66305 |
| H | -2.75508 | 3.51127  | -5.45965 |
| C | -2.52077 | 2.60022  | -3.43448 |
| C | -1.18125 | 3.04350  | -2.94354 |
| H | -1.22374 | 3.38643  | -1.90479 |
| H | -0.79656 | 3.85759  | -3.56398 |
| H | -0.47200 | 2.21033  | -2.96871 |
| C | -8.49976 | 1.17242  | -2.47391 |
| H | -9.45328 | 1.46237  | -2.02604 |
| H | -8.60171 | 0.15202  | -2.85565 |
| H | -8.31622 | 1.82583  | -3.33257 |
| C | -7.41907 | 1.27656  | -1.44829 |
| C | -7.52402 | 1.68086  | -0.12450 |
| H | -8.42373 | 1.98530  | 0.39159  |
| C | -6.22797 | 1.58621  | 0.40142  |
| C | -5.76976 | 1.89207  | 1.78942  |
| H | -5.49837 | 2.94844  | 1.90146  |
| H | -4.90026 | 1.28181  | 2.05121  |
| H | -6.56737 | 1.68349  | 2.50821  |
| C | -6.17129 | -2.13515 | -4.55899 |
| H | -7.14262 | -1.94992 | -4.09007 |
| H | -6.18007 | -3.14995 | -4.96382 |
| H | -6.07397 | -1.43798 | -5.39728 |
| C | -5.04818 | -2.00144 | -3.58343 |
| C | -4.09125 | -2.94370 | -3.23918 |
| H | -4.00149 | -3.94853 | -3.62710 |
| C | -3.27006 | -2.32154 | -2.28696 |
| C | -2.05047 | -2.87462 | -1.62597 |
| H | -1.15687 | -2.63360 | -2.20874 |
| H | -2.12254 | -3.96303 | -1.54413 |
| H | -1.90334 | -2.45780 | -0.62757 |
| C | 4.27169  | -5.35104 | -2.13580 |
| H | 5.34522  | -5.29760 | -2.34301 |
| H | 3.80053  | -5.91807 | -2.94184 |
| H | 4.14344  | -5.91642 | -1.20733 |
| C | 3.64504  | -3.99829 | -2.05119 |
| C | 2.66874  | -3.45041 | -2.86604 |
| H | 2.19648  | -3.91789 | -3.71820 |
| C | 2.43025  | -2.16078 | -2.36882 |
| C | 1.51501  | -1.13114 | -2.94130 |
| H | 0.61384  | -0.95428 | -2.34018 |
| H | 1.19201  | -1.44449 | -3.93797 |
| H | 2.02450  | -0.16775 | -3.04120 |
| C | 5.82554  | -5.24272 | 2.05914  |

---

|   |          |          |          |
|---|----------|----------|----------|
| H | 5.44487  | -5.89439 | 1.26686  |
| H | 5.87521  | -5.82503 | 2.98185  |
| H | 6.84457  | -4.95333 | 1.78553  |
| C | 4.94862  | -4.05320 | 2.27117  |
| C | 4.25021  | -3.69384 | 3.41802  |
| H | 4.23024  | -4.22680 | 4.35764  |
| C | 3.58607  | -2.50511 | 3.10256  |
| C | 2.68983  | -1.67580 | 3.96062  |
| H | 2.89253  | -1.86548 | 5.01788  |
| H | 1.63702  | -1.90823 | 3.77149  |
| H | 2.83657  | -0.60741 | 3.77119  |
| C | 8.13931  | -3.09766 | -1.22069 |
| H | 8.29991  | -3.60691 | -0.26602 |
| H | 9.11483  | -2.81786 | -1.62465 |
| H | 7.68392  | -3.81887 | -1.90666 |
| C | 7.29783  | -1.87474 | -1.06271 |
| C | 7.58046  | -0.57739 | -1.46980 |
| H | 8.47368  | -0.23736 | -1.97399 |
| C | 6.46514  | 0.18672  | -1.10391 |
| C | 6.17138  | 1.62322  | -1.39167 |
| H | 5.68888  | 1.72591  | -2.37098 |
| H | 7.08925  | 2.21600  | -1.41224 |
| H | 5.50755  | 2.05205  | -0.63521 |
| C | -3.92491 | 4.08763  | -0.53819 |
| H | -3.48502 | 4.23774  | -1.52801 |
| H | -4.93450 | 3.69251  | -0.66170 |
| C | -3.84644 | 5.34645  | 0.31912  |
| H | -4.64993 | 5.36284  | 1.06407  |
| H | -3.92647 | 6.25601  | -0.28234 |
| C | -2.48919 | 5.18981  | 1.00783  |
| H | -1.67688 | 5.46926  | 0.32756  |
| H | -2.39188 | 5.78235  | 1.92151  |
| C | -2.46284 | 3.69408  | 1.27953  |
| H | -1.46409 | 3.25927  | 1.33367  |
| H | -3.01053 | 3.44598  | 2.19769  |
| C | -5.77464 | -1.84628 | 0.63559  |
| H | -6.45153 | -1.00581 | 0.80797  |
| H | -6.33297 | -2.77160 | 0.82674  |
| H | -5.48465 | -1.84339 | -0.41710 |
| C | -5.10516 | -1.74165 | 3.54577  |
| H | -4.40975 | -1.86563 | 4.38097  |
| H | -5.86170 | -2.53129 | 3.62852  |
| H | -5.61680 | -0.78176 | 3.67510  |
| C | -3.59065 | -3.62224 | 1.66075  |
| H | -4.31091 | -4.33519 | 2.08031  |
| H | -2.63707 | -3.76442 | 2.17415  |
| H | -3.44906 | -3.88256 | 0.60781  |
| C | -2.71381 | 0.80917  | 4.23862  |
| H | -2.97863 | 1.78841  | 3.82548  |
| H | -1.97694 | 0.97229  | 5.03423  |
| H | -3.61381 | 0.38680  | 4.69459  |
| C | -1.41790 | -1.91782 | 3.79032  |
| H | -2.23237 | -2.52774 | 4.18879  |
| H | -0.78570 | -1.62288 | 4.63692  |
| H | -0.82075 | -2.55074 | 3.12453  |
| C | -0.31569 | 0.52046  | 2.47797  |
| H | -0.48345 | 1.58670  | 2.31012  |
| H | 0.30596  | 0.41693  | 3.37563  |
| C | 6.22956  | -0.11143 | 3.00353  |
| H | 5.61404  | -0.73780 | 3.65491  |
| H | 7.20006  | 0.02663  | 3.49594  |

---

|   |          |          |          |
|---|----------|----------|----------|
| H | 6.41136  | -0.65730 | 2.07335  |
| C | 6.87726  | 2.62915  | 1.91471  |
| H | 7.33730  | 2.07158  | 1.09388  |
| H | 7.66039  | 2.82534  | 2.65670  |
| H | 6.53468  | 3.59176  | 1.52621  |
| C | 5.26833  | 2.33417  | 4.48143  |
| H | 5.04321  | 3.40514  | 4.47977  |
| H | 6.20773  | 2.19993  | 5.03099  |
| H | 4.47930  | 1.82018  | 5.03905  |
| C | 3.84319  | 4.62384  | 1.58953  |
| H | 4.60219  | 4.83590  | 2.34918  |
| H | 3.12653  | 5.45366  | 1.60066  |
| H | 4.33549  | 4.62001  | 0.61093  |
| C | 2.06200  | 3.16472  | 3.59215  |
| H | 1.52198  | 2.25304  | 3.86139  |
| H | 1.33250  | 3.98191  | 3.53711  |
| H | 2.75947  | 3.39795  | 4.39967  |
| C | 1.49568  | 2.97229  | 0.61277  |
| H | 1.70018  | 3.75209  | -0.13340 |
| H | 0.56816  | 3.26002  | 1.11914  |
| C | -0.51224 | 0.72860  | -0.33165 |

159

CO P-P activation TS

|    |          |         |          |
|----|----------|---------|----------|
| Y  | -0.51842 | 5.63885 | 5.48472  |
| Y  | 5.72309  | 4.71430 | 6.55528  |
| B  | -3.16922 | 6.17294 | 3.10554  |
| H  | -4.05837 | 6.31604 | 2.31610  |
| B  | 7.88642  | 2.00439 | 6.44238  |
| H  | 8.67202  | 1.10204 | 6.45214  |
| P  | 2.88986  | 4.74936 | 6.99506  |
| P  | 3.68490  | 6.17445 | 5.18313  |
| Si | -2.16769 | 2.97839 | 7.32857  |
| Si | 0.21115  | 4.12025 | 8.64766  |
| Si | 7.87724  | 7.05775 | 8.18687  |
| Si | 5.13338  | 8.02060 | 7.42268  |
| O  | 1.29037  | 4.86689 | 4.57689  |
| O  | -0.42191 | 7.99542 | 6.47155  |
| N  | -2.00506 | 7.10777 | 2.70915  |
| N  | -0.85043 | 7.14803 | 3.42846  |
| N  | -3.70846 | 6.53703 | 4.50437  |
| N  | -2.93649 | 6.41821 | 5.61687  |
| N  | -2.68929 | 4.70524 | 3.04058  |
| N  | -1.56257 | 4.28636 | 3.68736  |
| N  | 6.63937  | 1.59030 | 5.63926  |
| N  | 5.64036  | 2.48210 | 5.37401  |
| N  | 7.49546  | 2.31132 | 7.91461  |
| N  | 6.51484  | 3.20315 | 8.23232  |
| N  | 8.54988  | 3.21699 | 5.72799  |
| N  | 7.83642  | 4.34121 | 5.43767  |
| N  | -0.87558 | 4.20085 | 7.27358  |
| N  | 6.32024  | 6.71314 | 7.40819  |
| C  | -2.97919 | 8.04181 | 0.58217  |
| H  | -3.20952 | 7.10048 | 0.07284  |
| H  | -2.65895 | 8.76262 | -0.17393 |
| H  | -3.90884 | 8.40803 | 1.02821  |
| C  | -1.89591 | 7.87492 | 1.59689  |
| C  | -0.62702 | 8.43435 | 1.60202  |
| H  | -0.20651 | 9.09961 | 0.86114  |
| C  | -0.00572 | 7.94500 | 2.75951  |
| C  | 1.38937  | 8.19849 | 3.22283  |
| H  | 1.43624  | 8.35125 | 4.30451  |

---

|   |          |          |          |
|---|----------|----------|----------|
| H | 1.80048  | 9.08478  | 2.73161  |
| H | 2.03904  | 7.34649  | 2.99574  |
| C | -6.04140 | 7.22368  | 3.84647  |
| H | -6.92917 | 7.58204  | 4.37302  |
| H | -6.31232 | 6.30912  | 3.31024  |
| H | -5.76727 | 7.97276  | 3.09711  |
| C | -4.94339 | 6.98847  | 4.83139  |
| C | -4.96768 | 7.16856  | 6.20684  |
| H | -5.80410 | 7.50608  | 6.80261  |
| C | -3.69399 | 6.79663  | 6.65857  |
| C | -3.19266 | 6.77512  | 8.06436  |
| H | -2.84222 | 7.76217  | 8.38677  |
| H | -2.37319 | 6.05823  | 8.16643  |
| H | -3.99463 | 6.47987  | 8.74755  |
| C | -4.35844 | 3.85416  | 1.35723  |
| H | -5.24678 | 4.08780  | 1.95203  |
| H | -4.53597 | 2.90642  | 0.84345  |
| H | -4.25666 | 4.63614  | 0.59802  |
| C | -3.13740 | 3.73277  | 2.20842  |
| C | -2.27024 | 2.65792  | 2.31762  |
| H | -2.33415 | 1.71535  | 1.79272  |
| C | -1.29180 | 3.05038  | 3.24198  |
| C | -0.07514 | 2.28572  | 3.64234  |
| H | 0.76940  | 2.57966  | 3.01275  |
| H | -0.24432 | 1.21243  | 3.51781  |
| H | 0.21635  | 2.48321  | 4.67403  |
| C | 7.30558  | -0.76940 | 5.07350  |
| H | 8.30237  | -0.56133 | 4.67163  |
| H | 6.87337  | -1.58851 | 4.49428  |
| H | 7.43235  | -1.11577 | 6.10405  |
| C | 6.40825  | 0.42147  | 4.99298  |
| C | 5.22643  | 0.56663  | 4.28390  |
| H | 4.74969  | -0.17319 | 3.65687  |
| C | 4.78229  | 1.87081  | 4.54442  |
| C | 3.57006  | 2.54661  | 4.00171  |
| H | 2.84512  | 2.79399  | 4.78233  |
| H | 3.07821  | 1.89545  | 3.27592  |
| H | 3.81908  | 3.48459  | 3.49530  |
| C | 9.01011  | 0.66279  | 9.06226  |
| H | 8.72879  | -0.22953 | 8.49481  |
| H | 9.19989  | 0.36174  | 10.09494 |
| H | 9.94735  | 1.03854  | 8.64129  |
| C | 7.93614  | 1.69975  | 9.03863  |
| C | 7.21640  | 2.21490  | 10.11083 |
| H | 7.32152  | 1.94354  | 11.15140 |
| C | 6.33675  | 3.15237  | 9.56149  |
| C | 5.32188  | 4.00435  | 10.24910 |
| H | 5.53848  | 4.06916  | 11.31832 |
| H | 4.31640  | 3.58633  | 10.13257 |
| H | 5.31290  | 5.02004  | 9.84002  |
| C | 10.79069 | 2.20001  | 5.20434  |
| H | 11.05844 | 1.99010  | 6.24405  |
| H | 11.69367 | 2.52108  | 4.68025  |
| H | 10.45489 | 1.26026  | 4.75484  |
| C | 9.75209  | 3.26780  | 5.10341  |
| C | 9.80632  | 4.45724  | 4.38740  |
| H | 10.62570 | 4.80747  | 3.77607  |
| C | 8.58049  | 5.09494  | 4.61622  |
| C | 8.05304  | 6.36831  | 4.03939  |
| H | 7.44630  | 6.16841  | 3.14854  |
| H | 8.87130  | 7.02978  | 3.74398  |

---

|   |          |          |          |
|---|----------|----------|----------|
| H | 7.42684  | 6.89879  | 4.76352  |
| C | -1.10718 | 9.12276  | 5.86025  |
| H | -0.48337 | 9.50413  | 5.04542  |
| H | -2.04504 | 8.75520  | 5.44547  |
| C | -1.26724 | 10.14922 | 6.97032  |
| H | -2.16282 | 9.94036  | 7.56505  |
| H | -1.34990 | 11.16657 | 6.57829  |
| C | -0.00146 | 9.92074  | 7.79649  |
| H | 0.85557  | 10.41410 | 7.32486  |
| H | -0.07736 | 10.28305 | 8.82508  |
| C | 0.15540  | 8.40609  | 7.73241  |
| H | 1.19803  | 8.08347  | 7.75640  |
| H | -0.38961 | 7.90494  | 8.54032  |
| C | -3.69791 | 3.36089  | 6.27287  |
| H | -4.28306 | 4.19496  | 6.66871  |
| H | -4.32920 | 2.46364  | 6.29779  |
| H | -3.45879 | 3.57375  | 5.22961  |
| C | -2.91037 | 2.71349  | 9.07229  |
| H | -2.20963 | 2.29828  | 9.80254  |
| H | -3.74104 | 2.00327  | 8.97900  |
| H | -3.31863 | 3.64306  | 9.48226  |
| C | -1.59688 | 1.25320  | 6.74575  |
| H | -2.29764 | 0.49358  | 7.11276  |
| H | -0.59725 | 0.99047  | 7.10059  |
| H | -1.59623 | 1.19736  | 5.65385  |
| C | -0.50109 | 4.86799  | 10.25833 |
| H | -0.80622 | 5.90936  | 10.10532 |
| H | 0.26485  | 4.86040  | 11.04319 |
| H | -1.36882 | 4.31944  | 10.63257 |
| C | 0.84993  | 2.37755  | 9.07858  |
| H | 0.04483  | 1.67642  | 9.31507  |
| H | 1.50847  | 2.43321  | 9.95376  |
| H | 1.42822  | 1.96053  | 8.24724  |
| C | 1.83151  | 5.14756  | 8.45428  |
| H | 1.60794  | 6.21631  | 8.47157  |
| H | 2.40195  | 4.93739  | 9.37042  |
| C | 8.89630  | 5.50090  | 8.56756  |
| H | 8.42238  | 4.85388  | 9.31077  |
| H | 9.85576  | 5.83563  | 8.98112  |
| H | 9.11175  | 4.90539  | 7.67680  |
| C | 9.03238  | 8.13972  | 7.12679  |
| H | 9.39038  | 7.58272  | 6.25555  |
| H | 9.91108  | 8.42069  | 7.71966  |
| H | 8.55856  | 9.05872  | 6.77321  |
| C | 7.69284  | 7.92368  | 9.87740  |
| H | 7.25325  | 8.92327  | 9.81322  |
| H | 8.68508  | 8.03014  | 10.33169 |
| H | 7.07867  | 7.32653  | 10.55981 |
| C | 5.85675  | 9.75571  | 7.10272  |
| H | 6.57705  | 10.07461 | 7.86153  |
| H | 5.03770  | 10.48532 | 7.09918  |
| H | 6.34781  | 9.80513  | 6.12505  |
| C | 4.19767  | 8.12476  | 9.07724  |
| H | 3.68456  | 7.18422  | 9.29802  |
| H | 3.44759  | 8.92456  | 9.04764  |
| H | 4.87889  | 8.34014  | 9.90547  |
| C | 3.80607  | 7.82111  | 6.04289  |
| H | 4.01269  | 8.56040  | 5.25624  |
| H | 2.82167  | 8.07380  | 6.45514  |
| C | 2.06297  | 5.39827  | 5.52777  |

---

CO insertion final product

|    |          |          |          |
|----|----------|----------|----------|
| Y  | -3.12696 | 0.74583  | -0.19634 |
| Y  | 3.36381  | -0.64482 | 0.25739  |
| B  | -5.39357 | 1.71939  | -2.73959 |
| H  | -6.17192 | 1.99418  | -3.60613 |
| B  | 5.50737  | -3.23533 | 1.16296  |
| H  | 6.28700  | -4.07742 | 1.50288  |
| P  | 0.57422  | -0.82796 | 1.16485  |
| P  | 1.28030  | 0.08843  | -1.55222 |
| Si | -4.46248 | -2.53852 | 0.51206  |
| Si | -2.37206 | -1.53376 | 2.37482  |
| Si | 5.46878  | 2.19190  | 0.90062  |
| Si | 2.78107  | 2.67134  | -0.39245 |
| O  | -0.96353 | 0.96530  | -0.15838 |
| O  | -3.27083 | 2.57959  | 1.46495  |
| N  | -4.41124 | 2.89494  | -2.55955 |
| N  | -3.37537 | 2.81498  | -1.68108 |
| N  | -6.19172 | 1.48529  | -1.43187 |
| N  | -5.57571 | 1.18806  | -0.25504 |
| N  | -4.60892 | 0.45766  | -3.16925 |
| N  | -3.57655 | -0.03743 | -2.42657 |
| N  | 4.26158  | -3.91057 | 0.55962  |
| N  | 3.27497  | -3.17941 | -0.03519 |
| N  | 5.12686  | -2.41126 | 2.42451  |
| N  | 4.16602  | -1.44443 | 2.40554  |
| N  | 6.18364  | -2.37024 | 0.06308  |
| N  | 5.48870  | -1.41170 | -0.60934 |
| N  | -3.33622 | -1.22357 | 0.92585  |
| N  | 3.98670  | 1.52778  | 0.20886  |
| C  | -5.33287 | 4.45101  | -4.31080 |
| H  | -5.32285 | 3.75752  | -5.15762 |
| H  | -5.08067 | 5.44500  | -4.68734 |
| H  | -6.35726 | 4.48448  | -3.92708 |
| C  | -4.35198 | 4.05661  | -3.25599 |
| C  | -3.23852 | 4.75095  | -2.80925 |
| H  | -2.88963 | 5.71232  | -3.15881 |
| C  | -2.65322 | 3.93580  | -1.82905 |
| C  | -1.42461 | 4.20547  | -1.02660 |
| H  | -0.98429 | 3.27555  | -0.66090 |
| H  | -1.63780 | 4.85332  | -0.16705 |
| H  | -0.67861 | 4.72212  | -1.63699 |
| C  | -8.50999 | 1.87196  | -2.33543 |
| H  | -9.52100 | 1.87007  | -1.92167 |
| H  | -8.47105 | 1.12799  | -3.13665 |
| H  | -8.33073 | 2.85171  | -2.78847 |
| C  | -7.53061 | 1.57017  | -1.24915 |
| C  | -7.78644 | 1.32070  | 0.09295  |
| H  | -8.75305 | 1.29930  | 0.57589  |
| C  | -6.53722 | 1.08274  | 0.67814  |
| C  | -6.23306 | 0.75180  | 2.10234  |
| H  | -6.02335 | 1.64994  | 2.69545  |
| H  | -5.36621 | 0.08946  | 2.17165  |
| H  | -7.08787 | 0.25081  | 2.56430  |
| C  | -5.72176 | 0.05224  | -5.38890 |
| H  | -6.74051 | -0.04489 | -5.00153 |
| H  | -5.60123 | -0.66235 | -6.20612 |
| H  | -5.62164 | 1.06021  | -5.80330 |
| C  | -4.69901 | -0.22353 | -4.33665 |
| C  | -3.69529 | -1.18205 | -4.34483 |
| H  | -3.48612 | -1.89535 | -5.12894 |
| C  | -3.00981 | -1.02845 | -3.13378 |



---

|   |          |          |          |
|---|----------|----------|----------|
| C | -1.81184 | -1.76395 | -2.64112 |
| H | -0.89076 | -1.20077 | -2.83974 |
| H | -1.73195 | -2.73685 | -3.13261 |
| H | -1.85774 | -1.92967 | -1.56036 |
| C | 4.89897  | -6.31371 | 0.95707  |
| H | 5.90405  | -6.28117 | 0.52446  |
| H | 4.46366  | -7.28848 | 0.72480  |
| H | 5.00718  | -6.24415 | 2.04423  |
| C | 4.01782  | -5.23644 | 0.41550  |
| C | 2.83872  | -5.36434 | -0.30068 |
| H | 2.35395  | -6.28416 | -0.59562 |
| C | 2.40981  | -4.05542 | -0.56633 |
| C | 1.19433  | -3.63611 | -1.32217 |
| H | 0.47157  | -3.14702 | -0.66078 |
| H | 0.71859  | -4.50801 | -1.77852 |
| H | 1.43846  | -2.91818 | -2.11080 |
| C | 6.65285  | -3.54748 | 4.07464  |
| H | 6.35269  | -4.58019 | 3.87256  |
| H | 6.85334  | -3.45622 | 5.14465  |
| H | 7.58962  | -3.36712 | 3.53880  |
| C | 5.59207  | -2.57065 | 3.68623  |
| C | 4.91066  | -1.67674 | 4.50279  |
| H | 5.04387  | -1.53996 | 5.56644  |
| C | 4.02817  | -0.99138 | 3.66090  |
| C | 3.06174  | 0.09183  | 4.01268  |
| H | 3.29619  | 0.49981  | 4.99932  |
| H | 2.03334  | -0.28283 | 4.03400  |
| H | 3.09584  | 0.90961  | 3.28641  |
| C | 8.41171  | -3.53342 | -0.04537 |
| H | 8.66676  | -3.37453 | 1.00650  |
| H | 9.32439  | -3.42424 | -0.63567 |
| H | 8.06432  | -4.56642 | -0.14732 |
| C | 7.39124  | -2.55419 | -0.52406 |
| C | 7.46923  | -1.68950 | -1.60864 |
| H | 8.29927  | -1.58168 | -2.29217 |
| C | 6.25130  | -0.99804 | -1.63122 |
| C | 5.75308  | 0.01161  | -2.61277 |
| H | 5.14202  | -0.46586 | -3.38793 |
| H | 6.58685  | 0.51400  | -3.10977 |
| H | 5.14088  | 0.76803  | -2.11064 |
| C | -4.20013 | 3.69383  | 1.39518  |
| H | -3.92546 | 4.32280  | 0.54226  |
| H | -5.19489 | 3.28540  | 1.22071  |
| C | -4.03084 | 4.42518  | 2.71540  |
| H | -4.60492 | 3.93237  | 3.50824  |
| H | -4.35737 | 5.46672  | 2.65378  |
| C | -2.52894 | 4.27542  | 2.96333  |
| H | -1.96921 | 5.00791  | 2.37245  |
| H | -2.24520 | 4.40140  | 4.01133  |
| C | -2.25232 | 2.86058  | 2.46687  |
| H | -1.27223 | 2.74379  | 1.99941  |
| H | -2.36406 | 2.12192  | 3.26702  |
| C | -5.79218 | -2.07578 | -0.76343 |
| H | -6.50367 | -1.33451 | -0.39143 |
| H | -6.34992 | -2.99524 | -0.98099 |
| H | -5.37246 | -1.71361 | -1.70447 |
| C | -5.46801 | -3.16266 | 2.01313  |
| H | -4.85496 | -3.60003 | 2.80614  |
| H | -6.16448 | -3.93793 | 1.67201  |
| H | -6.06377 | -2.35701 | 2.45452  |
| C | -3.60442 | -4.06056 | -0.24738 |

|   |          |          |          |
|---|----------|----------|----------|
| H | -4.33648 | -4.87071 | -0.35041 |
| H | -2.77196 | -4.43469 | 0.35214  |
| H | -3.22451 | -3.83204 | -1.24714 |
| C | -3.29726 | -0.98422 | 3.95406  |
| H | -3.54900 | 0.08177  | 3.91095  |
| H | -2.67728 | -1.14659 | 4.84363  |
| H | -4.23037 | -1.53904 | 4.08859  |
| C | -1.81299 | -3.33110 | 2.65293  |
| H | -2.63127 | -4.05336 | 2.70078  |
| H | -1.27439 | -3.37728 | 3.60713  |
| H | -1.11836 | -3.64663 | 1.86816  |
| C | -0.72650 | -0.55854 | 2.46254  |
| H | -0.89978 | 0.51999  | 2.53479  |
| H | -0.29346 | -0.86483 | 3.42434  |
| C | 6.53640  | 0.88967  | 1.78120  |
| H | 6.04631  | 0.45008  | 2.65391  |
| H | 7.44793  | 1.39146  | 2.12868  |
| H | 6.83830  | 0.08091  | 1.11023  |
| C | 6.64842  | 2.96707  | -0.38221 |
| H | 7.00862  | 2.21126  | -1.08740 |
| H | 7.52398  | 3.37655  | 0.13613  |
| H | 6.19234  | 3.77680  | -0.95701 |
| C | 5.13595  | 3.53006  | 2.22233  |
| H | 4.64103  | 4.41849  | 1.81834  |
| H | 6.08515  | 3.85369  | 2.66589  |
| H | 4.50970  | 3.13516  | 3.02963  |
| C | 3.48111  | 4.28494  | -1.13878 |
| H | 4.05324  | 4.88893  | -0.42818 |
| H | 2.64040  | 4.89620  | -1.48949 |
| H | 4.12048  | 4.07887  | -2.00336 |
| C | 1.62602  | 3.19934  | 1.02805  |
| H | 1.10723  | 2.32220  | 1.42760  |
| H | 0.88143  | 3.93053  | 0.69612  |
| H | 2.20926  | 3.65101  | 1.83724  |
| C | 1.75611  | 1.89372  | -1.80266 |
| H | 2.36122  | 1.91495  | -2.71909 |
| H | 0.86676  | 2.49821  | -2.01712 |
| C | 0.10019  | 0.20490  | -0.14877 |

157

CS2 insertion Y Dimer

|    |          |          |          |
|----|----------|----------|----------|
| C  | 0.95953  | 11.89717 | -3.15917 |
| N  | 1.94021  | 12.72919 | -2.76522 |
| N  | 1.49453  | 13.99848 | -2.99878 |
| C  | 0.24574  | 13.96896 | -3.52434 |
| C  | -0.12586 | 12.64037 | -3.64024 |
| B  | 2.36212  | 15.24676 | -2.75087 |
| N  | 2.66205  | 15.43816 | -1.24936 |
| N  | 3.35448  | 14.51970 | -0.51686 |
| C  | 3.46353  | 15.02316 | 0.72407  |
| C  | 2.83201  | 16.27354 | 0.78889  |
| C  | 2.33380  | 16.50699 | -0.48146 |
| Y  | 4.16839  | 12.35868 | -1.70857 |
| Si | 6.17612  | 9.66666  | -2.11905 |
| C  | 5.66333  | 9.48591  | -0.27813 |
| P  | 4.74955  | 10.84757 | 0.68940  |
| P  | 2.68954  | 10.44904 | -0.08061 |
| C  | 1.62716  | 11.68283 | 0.89102  |
| Si | 0.76682  | 10.83312 | 2.35030  |
| C  | -0.43328 | 9.53505  | 1.63907  |
| C  | 1.56815  | 17.69465 | -0.96576 |
| C  | 4.17246  | 14.33010 | 1.84049  |

---

|    |          |          |          |
|----|----------|----------|----------|
| C  | -0.54384 | 15.18150 | -3.89448 |
| C  | 1.05678  | 10.41053 | -3.10191 |
| Y  | 3.39785  | 8.77002  | 2.16234  |
| N  | 1.99358  | 10.04824 | 3.33934  |
| Si | 2.30946  | 10.51020 | 5.00376  |
| C  | 0.77503  | 10.53818 | 6.13321  |
| N  | 2.94238  | 6.69160  | 3.49695  |
| N  | 3.90027  | 5.72143  | 3.46905  |
| C  | 3.53732  | 4.68310  | 4.26270  |
| C  | 2.30497  | 4.99179  | 4.81486  |
| C  | 1.96288  | 6.25139  | 4.30057  |
| B  | 5.06503  | 5.77059  | 2.45744  |
| N  | 6.04297  | 6.92488  | 2.79510  |
| N  | 5.63094  | 8.21359  | 2.98302  |
| C  | 6.69437  | 8.90823  | 3.42637  |
| C  | 7.80408  | 8.06010  | 3.50782  |
| C  | 7.35757  | 6.81070  | 3.10271  |
| C  | 4.36381  | 3.45586  | 4.46406  |
| C  | 0.70193  | 7.01659  | 4.52498  |
| C  | 8.14102  | 5.54282  | 3.00797  |
| C  | 6.62218  | 10.35139 | 3.79813  |
| N  | 3.50284  | 6.74869  | 0.67731  |
| N  | 4.47186  | 5.84449  | 1.02410  |
| C  | 4.57280  | 4.88722  | 0.06715  |
| C  | 3.64086  | 5.17505  | -0.91587 |
| C  | 2.98344  | 6.33739  | -0.49074 |
| C  | 5.53602  | 3.74690  | 0.11404  |
| C  | 1.83241  | 7.01521  | -1.15469 |
| C  | 3.50286  | 9.26604  | 5.81435  |
| C  | 3.11845  | 12.22852 | 5.14658  |
| C  | -0.32361 | 12.12514 | 3.22742  |
| N  | 4.61143  | 14.21239 | -3.33700 |
| N  | 3.67542  | 15.17383 | -3.56444 |
| C  | 4.10044  | 16.02296 | -4.53076 |
| C  | 5.35756  | 15.59776 | -4.93564 |
| C  | 5.64077  | 14.46379 | -4.16305 |
| C  | 3.30973  | 17.18381 | -5.03809 |
| C  | 6.87983  | 13.63274 | -4.17950 |
| N  | 5.08893  | 10.73252 | -3.00078 |
| Si | 4.84329  | 10.37519 | -4.71575 |
| C  | 6.47636  | 10.19110 | -5.69063 |
| C  | 3.85905  | 11.72744 | -5.61583 |
| C  | 3.89011  | 8.75364  | -5.03786 |
| C  | 6.27851  | 7.85287  | -2.69735 |
| C  | 7.97893  | 10.29241 | -2.21583 |
| H  | 5.68495  | 4.75095  | 2.53969  |
| H  | 3.88478  | 2.81420  | 5.20726  |
| H  | 5.36950  | 3.69622  | 4.82215  |
| H  | 4.47219  | 2.87867  | 3.54025  |
| H  | 1.72806  | 4.38253  | 5.49611  |
| H  | 0.44140  | 7.03596  | 5.58792  |
| H  | -0.13279 | 6.54511  | 3.99285  |
| H  | 0.80340  | 8.04392  | 4.16716  |
| H  | 6.56742  | 4.08902  | 0.24033  |
| H  | 5.47893  | 3.18845  | -0.82316 |
| H  | 5.31644  | 3.05559  | 0.93372  |
| H  | 3.45794  | 4.61406  | -1.82116 |
| H  | 0.88243  | 6.60766  | -0.78756 |
| H  | 1.86577  | 6.85148  | -2.23505 |
| H  | 1.84248  | 8.09114  | -0.96085 |
| H  | 7.76703  | 4.77663  | 3.69400  |

---

|   |          |          |          |
|---|----------|----------|----------|
| H | 9.18406  | 5.74472  | 3.26254  |
| H | 8.11513  | 5.12025  | 1.99926  |
| H | 8.80349  | 8.31949  | 3.82678  |
| H | 7.61809  | 10.80125 | 3.75895  |
| H | 6.24063  | 10.47869 | 4.81755  |
| H | 5.96141  | 10.89473 | 3.11436  |
| H | 3.00166  | 8.31580  | 6.02161  |
| H | 3.84776  | 9.67823  | 6.77031  |
| H | 4.39068  | 9.03895  | 5.21559  |
| H | 4.05912  | 12.26567 | 4.58806  |
| H | 3.33280  | 12.47349 | 6.19370  |
| H | 2.46192  | 13.01042 | 4.75056  |
| H | 0.13762  | 11.40690 | 5.94784  |
| H | 1.09843  | 10.58282 | 7.18012  |
| H | 0.16512  | 9.63760  | 6.01216  |
| H | -1.00374 | 11.67224 | 3.95512  |
| H | -0.93601 | 12.62821 | 2.46958  |
| H | 0.26265  | 12.89504 | 3.73838  |
| H | 0.09127  | 8.75363  | 1.07780  |
| H | -1.14665 | 10.00827 | 0.95391  |
| H | -1.00332 | 9.05183  | 2.43981  |
| H | 2.22350  | 12.52767 | 1.24867  |
| H | 0.89313  | 12.09762 | 0.18830  |
| H | 1.74953  | 16.20316 | -3.12765 |
| H | 3.87490  | 17.69069 | -5.82380 |
| H | 2.35103  | 16.86864 | -5.46112 |
| H | 3.09677  | 17.91289 | -4.25036 |
| H | 5.97980  | 16.04541 | -5.69769 |
| H | 7.26508  | 13.54723 | -5.19960 |
| H | 7.66937  | 14.08434 | -3.56862 |
| H | 6.68291  | 12.63035 | -3.79271 |
| H | 0.57786  | 17.41897 | -1.34092 |
| H | 1.43162  | 18.39584 | -0.13905 |
| H | 2.08836  | 18.22095 | -1.77211 |
| H | 2.74565  | 16.92139 | 1.64985  |
| H | 4.98468  | 14.95589 | 2.22922  |
| H | 3.49218  | 14.13911 | 2.67644  |
| H | 4.59055  | 13.37144 | 1.52566  |
| H | -0.04916 | 15.77403 | -4.67016 |
| H | -1.51964 | 14.87235 | -4.27645 |
| H | -0.71051 | 15.83885 | -3.03565 |
| H | -1.05850 | 12.25784 | -4.02989 |
| H | 0.44280  | 10.00887 | -2.28857 |
| H | 0.69418  | 9.97817  | -4.04039 |
| H | 2.08020  | 10.08171 | -2.92498 |
| H | 4.40257  | 12.67410 | -5.66975 |
| H | 3.67481  | 11.38625 | -6.64176 |
| H | 2.89062  | 11.92360 | -5.14809 |
| H | 2.94870  | 8.71404  | -4.48356 |
| H | 3.65160  | 8.68447  | -6.10624 |
| H | 4.47515  | 7.87012  | -4.77092 |
| H | 7.08237  | 9.35304  | -5.33282 |
| H | 6.24836  | 10.00225 | -6.74655 |
| H | 7.09077  | 11.09474 | -5.63895 |
| H | 6.65184  | 7.73732  | -3.71909 |
| H | 6.97905  | 7.33308  | -2.03155 |
| H | 5.31310  | 7.34508  | -2.61759 |
| H | 8.05546  | 11.36753 | -2.03275 |
| H | 8.62592  | 9.76996  | -1.50113 |
| H | 8.37547  | 10.10801 | -3.22052 |
| H | 5.08628  | 8.54918  | -0.24647 |

---

|                                     |          |          |          |
|-------------------------------------|----------|----------|----------|
| H                                   | 6.57500  | 9.28019  | 0.29995  |
| O                                   | 6.37244  | 13.56971 | -0.86485 |
| C                                   | 6.57633  | 14.99599 | -0.86725 |
| C                                   | 7.32344  | 13.06894 | 0.08897  |
| C                                   | 8.09370  | 15.20081 | -0.72985 |
| C                                   | 8.60710  | 13.83851 | -0.21322 |
| H                                   | 7.39926  | 11.99024 | -0.03901 |
| H                                   | 6.95658  | 13.27500 | 1.10327  |
| H                                   | 9.18292  | 13.32261 | -0.98708 |
| H                                   | 9.24377  | 13.92885 | 0.67124  |
| H                                   | 8.31305  | 16.01641 | -0.03486 |
| H                                   | 8.55271  | 15.45794 | -1.68820 |
| H                                   | 6.03854  | 15.42868 | -0.01555 |
| H                                   | 6.14548  | 15.39009 | -1.78582 |
| 3                                   |          |          |          |
| CS <sub>2</sub>                     |          |          |          |
| S                                   | -0.00001 | -0.00000 | 0.01094  |
| C                                   | 0.00005  | -0.00000 | 1.57000  |
| S                                   | 0.00271  | 0.00000  | 3.12906  |
| 160                                 |          |          |          |
| CS <sub>2</sub> coordination adduct |          |          |          |
| C                                   | 5.04669  | 3.40534  | 0.07786  |
| C                                   | 3.82732  | 2.50121  | 0.10493  |
| O                                   | 2.88778  | 3.12304  | -0.79719 |
| C                                   | 3.16576  | 4.54893  | -0.84925 |
| C                                   | 4.38750  | 4.78443  | 0.04098  |
| Y                                   | 0.68739  | 1.97553  | -1.70802 |
| N                                   | 1.54946  | 0.34079  | -3.03449 |
| Si                                  | 1.31141  | 0.04402  | -4.76286 |
| C                                   | 0.27476  | -1.51122 | -5.14554 |
| N                                   | -1.51175 | 2.42861  | -2.79163 |
| C                                   | -2.49742 | 1.63016  | -3.23941 |
| C                                   | -3.50600 | 2.40682  | -3.82343 |
| C                                   | -3.08424 | 3.72067  | -3.71045 |
| N                                   | -1.88047 | 3.70970  | -3.08843 |
| C                                   | -2.48398 | 0.14350  | -3.12728 |
| B                                   | -1.00876 | 4.93123  | -2.74325 |
| N                                   | 0.35304  | 4.86500  | -3.47538 |
| N                                   | 1.22031  | 3.83232  | -3.29516 |
| C                                   | 2.29181  | 4.07932  | -4.06605 |
| C                                   | 2.10950  | 5.28844  | -4.75068 |
| C                                   | 0.86750  | 5.76086  | -4.35237 |
| C                                   | -3.78412 | 4.95421  | -4.17875 |
| C                                   | 0.17476  | 7.01275  | -4.78099 |
| C                                   | 3.47159  | 3.16667  | -4.12106 |
| N                                   | -0.79831 | 5.05803  | -1.21971 |
| N                                   | -0.08369 | 4.14137  | -0.50879 |
| C                                   | -0.00025 | 4.60941  | 0.74784  |
| C                                   | -0.68046 | 5.83167  | 0.84676  |
| C                                   | -1.17507 | 6.08765  | -0.42141 |
| C                                   | 0.75690  | 3.91660  | 1.83165  |
| C                                   | -1.98624 | 7.25614  | -0.87714 |
| P                                   | 1.21235  | 0.39712  | 0.66423  |
| Y                                   | -0.20024 | -1.64644 | 2.11569  |
| N                                   | -0.20493 | -3.64408 | 0.59704  |
| N                                   | 0.73198  | -4.59270 | 0.91250  |
| C                                   | 0.77852  | -5.53638 | -0.06197 |
| C                                   | -0.15629 | -5.19376 | -1.02454 |
| C                                   | -0.75865 | -4.01327 | -0.56933 |
| B                                   | 1.35006  | -4.71262 | 2.33211  |
| N                                   | 2.38001  | -3.60343 | 2.66756  |

---

|    |          |          |          |
|----|----------|----------|----------|
| N  | 2.02313  | -2.30378 | 2.89055  |
| C  | 3.12299  | -1.66004 | 3.32157  |
| C  | 4.20043  | -2.55182 | 3.35931  |
| C  | 3.69611  | -3.77447 | 2.94094  |
| C  | 3.11759  | -0.22377 | 3.72607  |
| C  | 4.42748  | -5.06911 | 2.80279  |
| C  | 1.69464  | -6.71569 | -0.05083 |
| C  | -1.88926 | -3.27588 | -1.20427 |
| P  | -0.86936 | 0.10018  | -0.09094 |
| C  | -1.86609 | 1.35904  | 0.91725  |
| Si | -2.74166 | 0.52279  | 2.37534  |
| C  | -3.76076 | 1.84492  | 3.29310  |
| C  | 2.05755  | -0.98593 | -0.33448 |
| Si | 2.57465  | -0.80136 | -2.17422 |
| C  | 4.41555  | -0.29052 | -2.26894 |
| C  | 2.56649  | -2.60771 | -2.78285 |
| C  | -4.01241 | -0.70830 | 1.66739  |
| N  | -1.53627 | -0.33197 | 3.33180  |
| Si | -1.16359 | 0.10427  | 4.99142  |
| C  | -0.27889 | 1.78593  | 5.12522  |
| N  | -0.71103 | -3.72379 | 3.43191  |
| N  | 0.20573  | -4.73126 | 3.36743  |
| C  | -0.17837 | -5.76453 | 4.15768  |
| C  | -1.38275 | -5.41395 | 4.74533  |
| C  | -1.68667 | -4.13496 | 4.25549  |
| C  | 0.60290  | -7.02629 | 4.32279  |
| C  | -2.90937 | -3.32290 | 4.52318  |
| C  | -2.66970 | 0.18745  | 6.15587  |
| C  | -0.00836 | -1.19730 | 5.76569  |
| C  | 2.94719  | -0.20837 | -5.71807 |
| C  | 0.41734  | 1.46931  | -5.64456 |
| H  | 1.93018  | -5.75721 | 2.38587  |
| H  | 0.11433  | -7.66039 | 5.06626  |
| H  | 1.62450  | -6.83123 | 4.66306  |
| H  | 0.66941  | -7.59242 | 3.38825  |
| H  | -1.96643 | -6.00861 | 5.43369  |
| H  | -3.13850 | -3.30457 | 5.59338  |
| H  | -3.77694 | -3.75566 | 4.01128  |
| H  | -2.77739 | -2.29661 | 4.17236  |
| H  | 2.74173  | -6.41789 | 0.05785  |
| H  | 1.59481  | -7.25772 | -0.99403 |
| H  | 1.46389  | -7.40910 | 0.76396  |
| H  | -0.37643 | -5.73065 | -1.93613 |
| H  | -2.85005 | -3.64107 | -0.82144 |
| H  | -1.88485 | -3.43156 | -2.28632 |
| H  | -1.82426 | -2.20331 | -1.00175 |
| H  | 4.03704  | -5.83590 | 3.47885  |
| H  | 5.48226  | -4.91341 | 3.04099  |
| H  | 4.36649  | -5.46718 | 1.78561  |
| H  | 5.21630  | -2.33805 | 3.65958  |
| H  | 4.12849  | 0.18860  | 3.66404  |
| H  | 2.77469  | -0.10591 | 4.76024  |
| H  | 2.45712  | 0.36083  | 3.07692  |
| H  | -0.54843 | -2.12428 | 5.98076  |
| H  | 0.37912  | -0.80753 | 6.71471  |
| H  | 0.85227  | -1.46203 | 5.14334  |
| H  | 0.64404  | 1.79013  | 4.53664  |
| H  | -0.02185 | 2.01172  | 6.16704  |
| H  | -0.91516 | 2.59753  | 4.75679  |
| H  | -3.27581 | 1.08224  | 5.99108  |
| H  | -2.32215 | 0.20986  | 7.19573  |

---

|   |          |          |          |
|---|----------|----------|----------|
| H | -3.31702 | -0.68736 | 6.04036  |
| H | -4.44628 | 1.40709  | 4.02505  |
| H | -4.36533 | 2.38539  | 2.55496  |
| H | -3.13529 | 2.58141  | 3.80671  |
| H | -3.53771 | -1.49971 | 1.07648  |
| H | -4.72292 | -0.19027 | 1.01220  |
| H | -4.58121 | -1.18332 | 2.47410  |
| H | -1.22753 | 2.16858  | 1.28299  |
| H | -2.58987 | 1.82061  | 0.23342  |
| H | -1.58089 | 5.91228  | -3.12016 |
| H | 0.80546  | 7.54861  | -5.49427 |
| H | -0.78332 | 6.80451  | -5.26673 |
| H | -0.02367 | 7.68091  | -3.93731 |
| H | 2.78678  | 5.75532  | -5.45187 |
| H | 3.82543  | 3.06617  | -5.15135 |
| H | 4.30771  | 3.55567  | -3.52777 |
| H | 3.21561  | 2.17485  | -3.74164 |
| H | -2.95887 | 6.94702  | -1.27225 |
| H | -2.16398 | 7.92377  | -0.03077 |
| H | -1.48228 | 7.82992  | -1.66089 |
| H | -0.79956 | 6.44762  | 1.72699  |
| H | 1.59959  | 4.53354  | 2.16620  |
| H | 0.12281  | 3.74256  | 2.70612  |
| H | 1.14475  | 2.95115  | 1.49898  |
| H | -3.19847 | 5.50035  | -4.92469 |
| H | -4.73580 | 4.67471  | -4.63690 |
| H | -3.99540 | 5.64538  | -3.35719 |
| H | -4.42159 | 2.05456  | -4.27678 |
| H | -3.11581 | -0.19163 | -2.29749 |
| H | -2.87611 | -0.30068 | -4.04782 |
| H | -1.48092 | -0.23821 | -2.93965 |
| H | 1.00843  | 2.38807  | -5.66779 |
| H | 0.23340  | 1.16061  | -6.68084 |
| H | -0.54798 | 1.70358  | -5.18807 |
| H | 0.07807  | -1.55272 | -6.22383 |
| H | 0.79165  | -2.43262 | -4.86644 |
| H | -0.68991 | -1.49698 | -4.63190 |
| H | 3.48867  | -1.10057 | -5.38885 |
| H | 2.72623  | -0.33550 | -6.78465 |
| H | 3.61984  | 0.64819  | -5.61709 |
| H | 2.93296  | -2.72950 | -3.80639 |
| H | 3.23208  | -3.18131 | -2.12551 |
| H | 1.57099  | -3.05502 | -2.71096 |
| H | 4.56563  | 0.78197  | -2.11593 |
| H | 5.02071  | -0.83431 | -1.53362 |
| H | 4.80956  | -0.52859 | -3.26334 |
| H | 1.43668  | -1.89491 | -0.31803 |
| H | 2.96005  | -1.24562 | 0.23586  |
| H | 4.00782  | 1.48613  | -0.24606 |
| H | 3.38609  | 2.44541  | 1.10752  |
| H | 5.63406  | 3.22836  | -0.83038 |
| H | 5.69801  | 3.25654  | 0.94361  |
| H | 4.08282  | 5.08166  | 1.05029  |
| H | 5.03723  | 5.56897  | -0.35668 |
| H | 2.27756  | 5.09017  | -0.51819 |
| H | 3.36260  | 4.81256  | -1.89040 |
| C | -6.52006 | -7.20040 | 1.33615  |
| S | -6.48716 | -8.70821 | 1.73311  |
| S | -6.55400 | -5.69343 | 0.93967  |

160

CS<sub>2</sub> coordination TS

---

|    |          |          |          |
|----|----------|----------|----------|
| C  | 8.36563  | 13.45957 | 0.01879  |
| C  | 7.09966  | 12.62299 | -0.00723 |
| O  | 6.22111  | 13.31958 | -0.92194 |
| C  | 6.56531  | 14.73452 | -0.90884 |
| C  | 7.78699  | 14.87546 | 0.00108  |
| Y  | 4.09041  | 12.34297 | -1.96839 |
| N  | 5.00705  | 10.79925 | -3.34297 |
| Si | 4.89175  | 10.59316 | -5.10216 |
| C  | 3.97887  | 9.00499  | -5.64014 |
| N  | 1.96255  | 12.81068 | -3.07173 |
| C  | 1.04946  | 12.00767 | -3.64657 |
| C  | -0.02702 | 12.77707 | -4.10457 |
| C  | 0.28308  | 14.08939 | -3.78745 |
| N  | 1.48887  | 14.08718 | -3.16921 |
| C  | 1.22326  | 10.53544 | -3.77700 |
| B  | 2.31492  | 15.30833 | -2.72880 |
| N  | 3.67372  | 15.34131 | -3.47638 |
| N  | 4.58425  | 14.33212 | -3.38086 |
| C  | 5.62924  | 14.67130 | -4.15452 |
| C  | 5.38859  | 15.91526 | -4.75115 |
| C  | 4.13789  | 16.31126 | -4.30052 |
| C  | -0.52200 | 15.31802 | -4.05615 |
| C  | 3.39073  | 17.56008 | -4.63537 |
| C  | 6.83572  | 13.80502 | -4.30642 |
| N  | 2.54728  | 15.32525 | -1.20399 |
| N  | 3.29898  | 14.37492 | -0.57903 |
| C  | 3.41663  | 14.76251 | 0.70440  |
| C  | 2.71970  | 15.96113 | 0.90434  |
| C  | 2.18119  | 16.29282 | -0.32842 |
| C  | 4.23188  | 14.02866 | 1.71595  |
| C  | 1.33888  | 17.47502 | -0.67982 |
| P  | 4.37301  | 10.56760 | 0.32004  |
| Y  | 3.09467  | 8.60183  | 2.01023  |
| N  | 3.78963  | 6.51730  | 0.58011  |
| N  | 4.57023  | 5.57763  | 1.18975  |
| C  | 4.76721  | 4.51778  | 0.36626  |
| C  | 4.09610  | 4.78045  | -0.81474 |
| C  | 3.49306  | 6.03320  | -0.63929 |
| B  | 5.03469  | 5.70522  | 2.65307  |
| N  | 5.90434  | 6.96292  | 2.87601  |
| N  | 5.38874  | 8.22593  | 2.88189  |
| C  | 6.39300  | 9.05300  | 3.22667  |
| C  | 7.56675  | 8.31537  | 3.41813  |
| C  | 7.22127  | 6.99240  | 3.18999  |
| C  | 6.21192  | 10.51684 | 3.44204  |
| C  | 8.09980  | 5.78681  | 3.25994  |
| C  | 5.56948  | 3.30806  | 0.71901  |
| C  | 2.62092  | 6.73073  | -1.62921 |
| P  | 2.29503  | 10.22121 | -0.39926 |
| C  | 1.40188  | 11.49137 | 0.67625  |
| Si | 0.94992  | 11.20180 | 2.52167  |
| C  | 0.79092  | 12.98139 | 3.19430  |
| C  | 5.41784  | 9.35082  | -0.69164 |
| Si | 6.01712  | 9.62816  | -2.49655 |
| C  | 7.85188  | 10.17244 | -2.49807 |
| C  | 6.07150  | 7.86156  | -3.20347 |
| C  | -0.82630 | 10.53282 | 2.67320  |
| N  | 2.12845  | 10.15984 | 3.32206  |
| Si | 2.43495  | 10.46927 | 5.03454  |
| C  | 3.34286  | 12.11783 | 5.35585  |
| N  | 2.82686  | 6.62768  | 3.52248  |



---

|   |          |          |          |
|---|----------|----------|----------|
| N | 3.82273  | 5.70221  | 3.61032  |
| C | 3.52079  | 4.77774  | 4.55421  |
| C | 2.28766  | 5.11518  | 5.08901  |
| C | 1.88521  | 6.27503  | 4.41398  |
| C | 4.40173  | 3.62825  | 4.91920  |
| C | 0.61657  | 7.03787  | 4.61101  |
| C | 0.84931  | 10.54971 | 6.09420  |
| C | 3.51055  | 9.12067  | 5.83364  |
| C | 6.59267  | 10.46840 | -5.96301 |
| C | 3.97705  | 12.03133 | -5.93966 |
| H | 5.70784  | 4.75025  | 2.91000  |
| H | 3.93927  | 3.06418  | 5.73256  |
| H | 5.38775  | 3.96201  | 5.25672  |
| H | 4.55615  | 2.94407  | 4.07915  |
| H | 1.75284  | 4.59198  | 5.86892  |
| H | 0.37467  | 7.09757  | 5.67659  |
| H | -0.22356 | 6.54198  | 4.11197  |
| H | 0.69425  | 8.05350  | 4.21638  |
| H | 6.59827  | 3.55989  | 0.99356  |
| H | 5.60427  | 2.63661  | -0.14222 |
| H | 5.13281  | 2.75632  | 1.55745  |
| H | 4.04780  | 4.14889  | -1.69039 |
| H | 1.58831  | 6.37129  | -1.55800 |
| H | 2.96816  | 6.52614  | -2.64591 |
| H | 2.59932  | 7.81282  | -1.48012 |
| H | 7.75713  | 5.07136  | 4.01348  |
| H | 9.11461  | 6.09530  | 3.52204  |
| H | 8.14472  | 5.25847  | 2.30255  |
| H | 8.53900  | 8.69310  | 3.70123  |
| H | 7.11646  | 11.05841 | 3.14870  |
| H | 6.03071  | 10.72962 | 4.50132  |
| H | 5.36961  | 10.89991 | 2.86139  |
| H | 2.98402  | 8.16628  | 5.91373  |
| H | 3.76784  | 9.44725  | 6.84859  |
| H | 4.44355  | 8.93601  | 5.29426  |
| H | 4.19327  | 12.24976 | 4.68137  |
| H | 3.72111  | 12.13612 | 6.38508  |
| H | 2.67830  | 12.97708 | 5.23244  |
| H | 0.18991  | 11.37362 | 5.80398  |
| H | 1.12373  | 10.70441 | 7.14476  |
| H | 0.27157  | 9.62268  | 6.03379  |
| H | 0.42489  | 13.02101 | 4.22453  |
| H | 0.05979  | 13.50653 | 2.56729  |
| H | 1.72881  | 13.53815 | 3.14017  |
| H | -0.93239 | 9.49342  | 2.35647  |
| H | -1.51865 | 11.14305 | 2.08196  |
| H | -1.14028 | 10.59486 | 3.72135  |
| H | 1.95939  | 12.43470 | 0.64016  |
| H | 0.46233  | 11.69292 | 0.14601  |
| H | 1.70612  | 16.29552 | -3.02229 |
| H | 3.99195  | 18.16949 | -5.31400 |
| H | 2.43752  | 17.34561 | -5.12786 |
| H | 3.17361  | 18.15847 | -3.74538 |
| H | 6.03350  | 16.45337 | -5.43136 |
| H | 7.10504  | 13.71392 | -5.36286 |
| H | 7.70466  | 14.22984 | -3.78985 |
| H | 6.65347  | 12.80298 | -3.91218 |
| H | 0.36269  | 17.17702 | -1.07429 |
| H | 1.17045  | 18.07651 | 0.21637  |
| H | 1.81495  | 18.11299 | -1.43074 |
| H | 2.61454  | 16.51065 | 1.82890  |

---

|   |          |          |          |
|---|----------|----------|----------|
| H | 5.25019  | 14.43267 | 1.75999  |
| H | 3.80121  | 14.14564 | 2.71291  |
| H | 4.30111  | 12.96138 | 1.49038  |
| H | -0.00429 | 16.00986 | -4.72779 |
| H | -1.46600 | 15.03408 | -4.52680 |
| H | -0.75369 | 15.86379 | -3.13663 |
| H | -0.91519 | 12.42303 | -4.60791 |
| H | 0.57513  | 10.00159 | -3.07581 |
| H | 0.96733  | 10.21867 | -4.79329 |
| H | 2.24789  | 10.23350 | -3.55790 |
| H | 4.50838  | 12.98159 | -5.84768 |
| H | 3.88541  | 11.79932 | -7.00752 |
| H | 2.96973  | 12.17444 | -5.54026 |
| H | 3.67747  | 9.10495  | -6.68972 |
| H | 4.62267  | 8.12487  | -5.56541 |
| H | 3.07887  | 8.81371  | -5.05157 |
| H | 7.12626  | 9.55514  | -5.68157 |
| H | 6.44157  | 10.43409 | -7.04875 |
| H | 7.24512  | 11.31774 | -5.74438 |
| H | 6.55633  | 7.80022  | -4.18236 |
| H | 6.65239  | 7.24284  | -2.50850 |
| H | 5.07485  | 7.42089  | -3.28150 |
| H | 7.97730  | 11.24827 | -2.34706 |
| H | 8.43240  | 9.64163  | -1.73400 |
| H | 8.29331  | 9.93380  | -3.47173 |
| H | 4.92150  | 8.37386  | -0.69647 |
| H | 6.31319  | 9.19427  | -0.07366 |
| H | 7.23852  | 11.60866 | -0.37819 |
| H | 6.62606  | 12.57346 | 0.97946  |
| H | 8.96677  | 13.26960 | -0.87740 |
| H | 8.98364  | 13.25451 | 0.89718  |
| H | 7.49043  | 15.17329 | 1.01250  |
| H | 8.48770  | 15.62643 | -0.37385 |
| H | 5.69692  | 15.29936 | -0.56471 |
| H | 6.78368  | 15.02954 | -1.93528 |
| C | 0.25381  | 8.38470  | 0.13072  |
| S | 0.63564  | 7.31009  | 1.26612  |
| S | -0.74775 | 9.00090  | -0.92839 |

160

CS<sub>2</sub> coordination product

|    |          |          |          |
|----|----------|----------|----------|
| C  | 4.95494  | 1.94240  | -1.01956 |
| C  | 3.65170  | 1.24792  | -1.38557 |
| O  | 2.66813  | 2.30782  | -1.51022 |
| C  | 3.20733  | 3.54313  | -0.96573 |
| C  | 4.45551  | 3.13324  | -0.19925 |
| Y  | 0.36352  | 1.87726  | -2.32041 |
| N  | 0.92030  | 0.39178  | -3.90195 |
| Si | 1.10851  | 0.66100  | -5.64842 |
| C  | 0.24335  | -0.62565 | -6.75774 |
| N  | -1.71825 | 2.73259  | -3.24049 |
| C  | -2.69905 | 2.12992  | -3.93795 |
| C  | -3.70219 | 3.06218  | -4.23026 |
| C  | -3.28257 | 4.26025  | -3.67626 |
| N  | -2.08365 | 4.03949  | -3.08538 |
| C  | -2.67729 | 0.68805  | -4.30183 |
| B  | -1.17488 | 5.06914  | -2.40089 |
| N  | 0.18078  | 5.17658  | -3.14340 |
| N  | 1.01510  | 4.11092  | -3.30803 |
| C  | 2.08813  | 4.56268  | -3.98197 |
| C  | 1.94409  | 5.92986  | -4.24415 |
| C  | 0.72063  | 6.28739  | -3.69901 |

---

|    |          |          |          |
|----|----------|----------|----------|
| C  | -3.97793 | 5.58156  | -3.69985 |
| C  | 0.07174  | 7.63245  | -3.69513 |
| C  | 3.21950  | 3.68631  | -4.40496 |
| N  | -0.92455 | 4.73811  | -0.91268 |
| N  | -0.16530 | 3.67127  | -0.52874 |
| C  | 0.02564  | 3.79473  | 0.79770  |
| C  | -0.62716 | 4.94098  | 1.26848  |
| C  | -1.22128 | 5.51620  | 0.15646  |
| C  | 0.83016  | 2.82643  | 1.59667  |
| C  | -2.04928 | 6.75743  | 0.09220  |
| P  | 0.54437  | -0.37119 | -0.18296 |
| Y  | -0.15314 | -2.14156 | 2.06782  |
| N  | 1.05858  | -4.42998 | 1.29297  |
| N  | 1.85043  | -4.99587 | 2.25478  |
| C  | 2.51073  | -6.07351 | 1.75893  |
| C  | 2.12978  | -6.21880 | 0.43948  |
| C  | 1.21388  | -5.18391 | 0.19184  |
| B  | 1.78458  | -4.57345 | 3.73104  |
| N  | 2.42116  | -3.17338 | 3.92222  |
| N  | 2.05841  | -2.09716 | 3.16751  |
| C  | 2.91209  | -1.10296 | 3.46764  |
| C  | 3.82924  | -1.54318 | 4.42768  |
| C  | 3.48817  | -2.86146 | 4.69433  |
| C  | 2.82376  | 0.24838  | 2.84582  |
| C  | 4.14248  | -3.80677 | 5.64698  |
| C  | 3.46354  | -6.91459 | 2.54367  |
| C  | 0.47524  | -4.98083 | -1.08868 |
| P  | -1.51119 | -0.09721 | -0.88763 |
| C  | -2.25688 | 0.90688  | 0.47554  |
| Si | -2.65275 | 0.33092  | 2.27199  |
| C  | -3.09327 | 2.03671  | 3.01807  |
| C  | 1.32494  | -1.45810 | -1.50540 |
| Si | 1.01960  | -1.30079 | -3.38995 |
| C  | 2.51949  | -2.22380 | -4.12672 |
| C  | -0.51263 | -2.33606 | -3.80992 |
| C  | -4.29241 | -0.62340 | 2.24206  |
| N  | -1.34444 | -0.53808 | 3.09843  |
| Si | -1.19955 | -0.20343 | 4.83731  |
| C  | -0.47737 | 1.52184  | 5.21030  |
| N  | -0.67790 | -3.92555 | 3.64370  |
| N  | 0.32176  | -4.64266 | 4.23105  |
| C  | -0.19930 | -5.49141 | 5.14938  |
| C  | -1.57630 | -5.31599 | 5.15032  |
| C  | -1.83589 | -4.33270 | 4.18874  |
| C  | 0.60970  | -6.43279 | 5.97929  |
| C  | -3.15342 | -3.78916 | 3.75123  |
| C  | -2.85210 | -0.36670 | 5.77583  |
| C  | -0.03223 | -1.38656 | 5.75823  |
| C  | 2.93814  | 0.60475  | -6.19616 |
| C  | 0.34985  | 2.30779  | -6.21529 |
| H  | 2.42581  | -5.34586 | 4.38161  |
| H  | -0.04450 | -6.93622 | 6.69481  |
| H  | 1.39229  | -5.91492 | 6.54127  |
| H  | 1.09538  | -7.20031 | 5.36837  |
| H  | -2.29626 | -5.83753 | 5.76463  |
| H  | -3.91455 | -3.97339 | 4.51376  |
| H  | -3.48417 | -4.25959 | 2.81881  |
| H  | -3.09397 | -2.71374 | 3.56901  |
| H  | 4.28031  | -6.32146 | 2.96700  |
| H  | 3.90170  | -7.66987 | 1.88686  |
| H  | 2.97158  | -7.43393 | 3.37230  |

---

|   |          |          |          |
|---|----------|----------|----------|
| H | 2.45731  | -6.98095 | -0.25343 |
| H | -0.04716 | -5.90372 | -1.36371 |
| H | 1.16257  | -4.74486 | -1.90847 |
| H | -0.27399 | -4.19297 | -1.00771 |
| H | 3.43451  | -4.18812 | 6.38859  |
| H | 4.94286  | -3.28766 | 6.17934  |
| H | 4.57809  | -4.66996 | 5.13475  |
| H | 4.63630  | -0.97908 | 4.87304  |
| H | 3.81491  | 0.58110  | 2.51983  |
| H | 2.44881  | 0.98823  | 3.56065  |
| H | 2.15674  | 0.24078  | 1.98015  |
| H | -0.36707 | -2.42601 | 5.72920  |
| H | -0.03063 | -1.06727 | 6.80799  |
| H | 1.00010  | -1.34035 | 5.40241  |
| H | 0.50964  | 1.62815  | 4.74788  |
| H | -0.34910 | 1.63600  | 6.29335  |
| H | -1.10618 | 2.34245  | 4.85850  |
| H | -3.63854 | 0.29893  | 5.41059  |
| H | -2.68970 | -0.13791 | 6.83585  |
| H | -3.22688 | -1.39364 | 5.71438  |
| H | -3.40755 | 1.99798  | 4.06420  |
| H | -3.93372 | 2.43968  | 2.43996  |
| H | -2.26808 | 2.74996  | 2.93100  |
| H | -4.21036 | -1.58352 | 1.72654  |
| H | -5.05330 | -0.02911 | 1.72400  |
| H | -4.64752 | -0.80366 | 3.26238  |
| H | -1.64799 | 1.81458  | 0.54995  |
| H | -3.22394 | 1.23962  | 0.07365  |
| H | -1.71178 | 6.13624  | -2.45649 |
| H | 0.71351  | 8.34399  | -4.21983 |
| H | -0.90019 | 7.61874  | -4.19699 |
| H | -0.08815 | 8.00673  | -2.67936 |
| H | 2.63420  | 6.57390  | -4.77047 |
| H | 3.18206  | 3.49709  | -5.48220 |
| H | 4.18117  | 4.16572  | -4.19335 |
| H | 3.18954  | 2.72290  | -3.89542 |
| H | -3.04144 | 6.56162  | -0.32523 |
| H | -2.18104 | 7.15570  | 1.10080  |
| H | -1.58310 | 7.53472  | -0.52102 |
| H | -0.66423 | 5.30326  | 2.28588  |
| H | 1.46114  | 3.36192  | 2.31358  |
| H | 0.19362  | 2.14222  | 2.16787  |
| H | 1.45752  | 2.21063  | 0.95195  |
| H | -3.39784 | 6.34063  | -4.23410 |
| H | -4.93934 | 5.47328  | -4.20692 |
| H | -4.16884 | 5.96242  | -2.69205 |
| H | -4.61854 | 2.88287  | -4.77387 |
| H | -3.22258 | 0.09205  | -3.55914 |
| H | -3.15606 | 0.53896  | -5.27450 |
| H | -1.65615 | 0.30536  | -4.34480 |
| H | 0.74969  | 3.19238  | -5.71737 |
| H | 0.53235  | 2.41221  | -7.29169 |
| H | -0.73355 | 2.30510  | -6.06125 |
| H | -0.83681 | -0.65803 | -6.58767 |
| H | 0.40499  | -0.33031 | -7.80182 |
| H | 0.63942  | -1.63850 | -6.64203 |
| H | 3.27050  | -0.43119 | -6.31290 |
| H | 3.05939  | 1.10103  | -7.16635 |
| H | 3.61066  | 1.08707  | -5.48278 |
| H | -0.69051 | -2.38312 | -4.88702 |
| H | -0.36843 | -3.36164 | -3.45357 |

---

|   |          |          |          |
|---|----------|----------|----------|
| H | -1.41770 | -1.94745 | -3.33644 |
| H | 3.45349  | -1.67514 | -3.96522 |
| H | 2.61674  | -3.20112 | -3.63920 |
| H | 2.41587  | -2.40486 | -5.20087 |
| H | 1.12503  | -2.50819 | -1.27312 |
| H | 2.40536  | -1.33596 | -1.35641 |
| H | 3.68205  | 0.70573  | -2.33419 |
| H | 3.31393  | 0.57055  | -0.59395 |
| H | 5.47658  | 2.28807  | -1.91882 |
| H | 5.62947  | 1.28334  | -0.46678 |
| H | 4.19983  | 2.81806  | 0.81805  |
| H | 5.18042  | 3.94887  | -0.13187 |
| H | 2.43125  | 4.00876  | -0.35826 |
| H | 3.44584  | 4.20994  | -1.79914 |
| C | -2.58097 | -1.63447 | -0.73589 |
| S | -2.09648 | -2.94150 | 0.26806  |
| S | -4.01056 | -1.56857 | -1.56957 |

160

CS<sub>2</sub> coordination TS less favorable (THF side)

|    |          |          |          |
|----|----------|----------|----------|
| N  | 3.77204  | 5.56534  | 3.53640  |
| N  | 2.85566  | 6.56551  | 3.37151  |
| C  | 1.72245  | 6.16924  | 3.97303  |
| C  | 1.91702  | 4.90913  | 4.55163  |
| C  | 3.22504  | 4.55451  | 4.25377  |
| Y  | 3.68933  | 8.65037  | 2.40612  |
| N  | 2.39637  | 9.96364  | 3.63289  |
| Si | 2.50535  | 10.14837 | 5.38391  |
| C  | 3.51094  | 8.72141  | 6.14155  |
| C  | 0.47341  | 6.98429  | 3.93105  |
| C  | 3.95269  | 3.30584  | 4.62821  |
| B  | 5.13516  | 5.57237  | 2.79275  |
| N  | 4.86363  | 5.75070  | 1.28242  |
| N  | 4.11878  | 6.79314  | 0.80385  |
| C  | 3.83152  | 6.51389  | -0.47644 |
| C  | 4.41705  | 5.29390  | -0.83695 |
| C  | 5.05993  | 4.83468  | 0.30168  |
| C  | 2.95476  | 7.39476  | -1.29600 |
| C  | 5.84517  | 3.57692  | 0.47670  |
| P  | 3.56865  | 10.79624 | 0.42894  |
| C  | 2.71464  | 12.03325 | 1.56822  |
| Si | 1.46448  | 11.09387 | 2.64012  |
| C  | 0.37063  | 12.35021 | 3.55690  |
| P  | 5.68882  | 11.47198 | 0.19424  |
| C  | 6.29111  | 9.94706  | -0.71320 |
| Si | 6.38510  | 10.02230 | -2.61655 |
| C  | 8.08140  | 10.73226 | -3.11019 |
| Y  | 4.24776  | 12.64379 | -1.99148 |
| N  | 1.81925  | 12.56185 | -2.57518 |
| C  | 0.94752  | 11.54677 | -2.69492 |
| C  | -0.29446 | 12.03350 | -3.11964 |
| C  | -0.13346 | 13.40292 | -3.25519 |
| N  | 1.14686  | 13.69643 | -2.92471 |
| C  | 1.30715  | 10.13425 | -2.40100 |
| C  | -1.14532 | 14.41186 | -3.68952 |
| B  | 1.81155  | 15.08311 | -2.92075 |
| N  | 2.98634  | 15.13569 | -3.92822 |
| N  | 4.06891  | 14.31990 | -3.81802 |
| C  | 4.91290  | 14.64705 | -4.80908 |
| C  | 4.36129  | 15.68570 | -5.57108 |
| C  | 3.13692  | 15.97187 | -4.98383 |
| C  | 6.23800  | 13.98412 | -4.98849 |

---

|    |          |          |          |
|----|----------|----------|----------|
| C  | 2.12826  | 16.99137 | -5.40089 |
| N  | 3.24993  | 14.73873 | -0.84927 |
| C  | 3.48147  | 15.37320 | 0.31200  |
| C  | 2.65004  | 16.49853 | 0.41251  |
| C  | 1.90777  | 16.52103 | -0.75669 |
| N  | 2.28963  | 15.45398 | -1.50141 |
| C  | 4.52549  | 14.94193 | 1.28576  |
| C  | 0.86611  | 17.50829 | -1.17067 |
| N  | 5.04591  | 10.95393 | -3.30338 |
| Si | 4.54653  | 10.47972 | -4.93535 |
| C  | 3.31049  | 11.68237 | -5.73315 |
| C  | 3.66956  | 8.78618  | -5.03791 |
| C  | 5.99940  | 10.34884 | -6.17073 |
| C  | 0.27170  | 10.10819 | 1.52790  |
| N  | 5.73811  | 7.98578  | 3.37695  |
| N  | 6.08047  | 6.66381  | 3.35350  |
| C  | 7.29229  | 6.50081  | 3.93260  |
| C  | 7.73882  | 7.75040  | 4.34486  |
| C  | 6.73722  | 8.65311  | 3.98271  |
| C  | 7.98718  | 5.18629  | 4.06642  |
| C  | 6.66653  | 10.12014 | 4.23053  |
| O  | 6.22620  | 14.38527 | -1.78617 |
| C  | 6.10284  | 15.82845 | -1.90482 |
| C  | 7.49604  | 16.40197 | -1.65233 |
| C  | 8.15599  | 15.31424 | -0.80510 |
| C  | 7.59089  | 14.06015 | -1.44596 |
| C  | 3.35967  | 11.77507 | 5.87925  |
| C  | 0.82733  | 10.10348 | 6.28181  |
| C  | 6.49271  | 8.18344  | -3.12243 |
| C  | 7.90777  | 12.07223 | 1.77782  |
| S  | 7.51834  | 13.36015 | 2.63828  |
| S  | 8.94196  | 10.96996 | 1.27093  |
| H  | 5.66478  | 4.51408  | 2.96330  |
| H  | 3.30481  | 2.68022  | 5.24617  |
| H  | 4.86063  | 3.52049  | 5.20004  |
| H  | 4.24662  | 2.72426  | 3.74901  |
| H  | 1.19844  | 4.32579  | 5.10941  |
| H  | -0.11504 | 6.83439  | 4.84028  |
| H  | -0.15408 | 6.68884  | 3.08159  |
| H  | 0.70658  | 8.04780  | 3.83232  |
| H  | 6.85445  | 3.77660  | 0.84850  |
| H  | 5.93446  | 3.06942  | -0.48634 |
| H  | 5.36538  | 2.88736  | 1.17859  |
| H  | 4.38039  | 4.80956  | -1.80200 |
| H  | 3.04416  | 8.43907  | -0.98602 |
| H  | 1.90393  | 7.09702  | -1.19326 |
| H  | 3.21220  | 7.32855  | -2.35507 |
| H  | 7.40544  | 4.47398  | 4.65890  |
| H  | 8.94866  | 5.33533  | 4.56230  |
| H  | 8.17659  | 4.72702  | 3.09157  |
| H  | 8.67488  | 7.97537  | 4.83469  |
| H  | 6.14389  | 10.64709 | 3.42582  |
| H  | 7.66909  | 10.54673 | 4.29189  |
| H  | 6.15291  | 10.33302 | 5.17460  |
| H  | 2.99400  | 7.76322  | 6.02849  |
| H  | 3.62953  | 8.91125  | 7.21498  |
| H  | 4.51334  | 8.61094  | 5.71734  |
| H  | 2.74859  | 12.64589 | 5.62198  |
| H  | 4.32345  | 11.88869 | 5.37356  |
| H  | 3.53673  | 11.80484 | 6.96077  |
| H  | 0.20462  | 10.97112 | 6.04827  |

---

|   |          |          |          |
|---|----------|----------|----------|
| H | 0.99735  | 10.10036 | 7.36506  |
| H | 0.26080  | 9.20111  | 6.03267  |
| H | -0.46462 | 11.86603 | 4.07144  |
| H | -0.05118 | 13.03400 | 2.81073  |
| H | 0.92143  | 12.95459 | 4.28286  |
| H | 0.77465  | 9.31509  | 0.96103  |
| H | -0.20839 | 10.77078 | 0.79882  |
| H | -0.51430 | 9.64006  | 2.13080  |
| H | 3.43751  | 12.47285 | 2.26406  |
| H | 2.25219  | 12.84538 | 0.99787  |
| H | 0.99730  | 15.89037 | -3.26383 |
| H | 2.48892  | 17.51301 | -6.29050 |
| H | 1.16403  | 16.53497 | -5.64422 |
| H | 1.94988  | 17.73754 | -4.62046 |
| H | 4.78985  | 16.16165 | -6.44176 |
| H | 7.04447  | 14.59441 | -4.56630 |
| H | 6.26015  | 13.00646 | -4.50119 |
| H | 6.45452  | 13.84689 | -6.05196 |
| H | -0.10453 | 17.03195 | -1.33962 |
| H | 0.74244  | 18.25480 | -0.38253 |
| H | 1.13786  | 18.03204 | -2.09230 |
| H | 2.59856  | 17.20555 | 1.22848  |
| H | 5.05338  | 14.04559 | 0.95635  |
| H | 5.27035  | 15.73378 | 1.42312  |
| H | 4.09125  | 14.73893 | 2.26921  |
| H | -0.83548 | 14.93836 | -4.59742 |
| H | -2.09064 | 13.90583 | -3.89904 |
| H | -1.32996 | 15.16711 | -2.91931 |
| H | -1.19111 | 11.46152 | -3.31109 |
| H | 1.10964  | 9.89361  | -1.35257 |
| H | 0.71750  | 9.45773  | -3.02703 |
| H | 2.36741  | 9.95302  | -2.58089 |
| H | 3.76317  | 12.63945 | -6.00147 |
| H | 2.94116  | 11.21497 | -6.65413 |
| H | 2.44856  | 11.88510 | -5.09163 |
| H | 2.72438  | 8.78503  | -4.48833 |
| H | 3.43619  | 8.57780  | -6.08933 |
| H | 4.28617  | 7.96440  | -4.66701 |
| H | 6.71466  | 9.56426  | -5.90472 |
| H | 5.60287  | 10.10673 | -7.16419 |
| H | 6.55186  | 11.28911 | -6.25643 |
| H | 6.62497  | 8.02243  | -4.19615 |
| H | 7.36871  | 7.75942  | -2.61588 |
| H | 5.62001  | 7.61404  | -2.79070 |
| H | 8.21701  | 11.76201 | -2.77451 |
| H | 8.88405  | 10.12989 | -2.66933 |
| H | 8.20342  | 10.71523 | -4.19813 |
| H | 5.68085  | 9.07644  | -0.43800 |
| H | 7.30720  | 9.74373  | -0.33826 |
| H | 8.13717  | 13.81274 | -2.36624 |
| H | 7.56776  | 13.18732 | -0.79169 |
| H | 9.24863  | 15.34009 | -0.83457 |
| H | 7.83888  | 15.37759 | 0.24069  |
| H | 7.45073  | 17.37548 | -1.15590 |
| H | 8.04153  | 16.53187 | -2.59431 |
| H | 5.38227  | 16.16214 | -1.15536 |
| H | 5.70991  | 16.06908 | -2.89462 |

160

CS<sub>2</sub> coordination product less favorable (THF side)

|   |          |          |         |
|---|----------|----------|---------|
| N | -0.12189 | -5.50089 | 3.99633 |
| N | -1.05078 | -4.50276 | 4.05331 |

---

|    |          |          |          |
|----|----------|----------|----------|
| C  | -2.06425 | -4.94367 | 4.81433  |
| C  | -1.77671 | -6.23674 | 5.26989  |
| C  | -0.54051 | -6.56066 | 4.72981  |
| Y  | -0.44813 | -2.41988 | 2.91595  |
| N  | -1.66162 | -1.01720 | 4.12535  |
| Si | -1.34533 | -0.69704 | 5.83172  |
| C  | -0.20757 | -2.04843 | 6.54178  |
| C  | -3.29558 | -4.13269 | 5.04457  |
| C  | 0.23724  | -7.82499 | 4.89008  |
| B  | 1.10352  | -5.42491 | 3.04674  |
| N  | 0.58558  | -5.22937 | 1.59650  |
| N  | -0.35793 | -4.28836 | 1.27465  |
| C  | -0.80340 | -4.58577 | 0.04326  |
| C  | -0.11903 | -5.70524 | -0.44703 |
| C  | 0.75013  | -6.08961 | 0.56096  |
| C  | -1.92685 | -3.85682 | -0.61586 |
| C  | 1.71766  | -7.22677 | 0.56085  |
| P  | -1.02631 | -0.59036 | 0.77160  |
| C  | -1.72445 | 0.80617  | 1.79040  |
| Si | -2.75133 | 0.00214  | 3.17407  |
| C  | -3.67005 | 1.37926  | 4.11045  |
| P  | 0.70781  | 0.21227  | -0.32889 |
| C  | 1.11848  | -1.23718 | -1.39524 |
| Si | 1.75985  | -0.84094 | -3.14506 |
| C  | 3.61735  | -0.46090 | -3.12180 |
| Y  | 0.13801  | 2.17173  | -2.50240 |
| N  | -2.12408 | 1.97246  | -3.28513 |
| C  | -2.92016 | 0.89940  | -3.43605 |
| C  | -4.06908 | 1.27406  | -4.14187 |
| C  | -3.93003 | 2.63033  | -4.40435 |
| N  | -2.74968 | 3.03165  | -3.87577 |
| C  | -2.56413 | -0.43923 | -2.88461 |
| C  | -4.87302 | 3.53366  | -5.12809 |
| B  | -2.21131 | 4.47505  | -3.73019 |
| N  | -0.86178 | 4.67979  | -4.46840 |
| N  | 0.25564  | 3.97425  | -4.14238 |
| C  | 1.25296  | 4.42344  | -4.92267 |
| C  | 0.77176  | 5.44067  | -5.75342 |
| C  | -0.57513 | 5.57619  | -5.44120 |
| C  | 2.63047  | 3.84755  | -4.87728 |
| C  | -1.56989 | 6.51463  | -6.04083 |
| N  | -1.21328 | 4.11156  | -1.41825 |
| C  | -1.35107 | 4.64087  | -0.19042 |
| C  | -2.28529 | 5.68666  | -0.22402 |
| C  | -2.71330 | 5.76673  | -1.53683 |
| N  | -2.05475 | 4.81114  | -2.23801 |
| C  | -0.59910 | 4.16729  | 1.00492  |
| C  | -3.71283 | 6.70545  | -2.12891 |
| N  | 0.81716  | 0.50305  | -3.84297 |
| Si | 0.48982  | 0.34123  | -5.58675 |
| C  | -0.37003 | 1.82948  | -6.39741 |
| C  | -0.69361 | -1.08656 | -6.03313 |
| C  | 2.09843  | 0.10693  | -6.58553 |
| C  | -4.11406 | -1.07898 | 2.39559  |
| N  | 1.73375  | -3.00777 | 3.59020  |
| N  | 2.09566  | -4.32216 | 3.48787  |
| C  | 3.38018  | -4.46580 | 3.89163  |
| C  | 3.85302  | -3.21518 | 4.26400  |
| C  | 2.79395  | -2.32622 | 4.05902  |
| C  | 4.11181  | -5.76717 | 3.91074  |
| C  | 2.76120  | -0.85322 | 4.27320  |



---

|   |          |          |          |
|---|----------|----------|----------|
| O | 2.06226  | 3.42527  | -1.73498 |
| C | 2.03760  | 4.85019  | -1.42539 |
| C | 3.48048  | 5.22826  | -1.12329 |
| C | 4.04355  | 3.92938  | -0.54484 |
| C | 3.37686  | 2.88009  | -1.41448 |
| C | -0.48034 | 0.97076  | 6.12026  |
| C | -2.90169 | -0.72057 | 6.92866  |
| C | 1.61334  | -2.53700 | -4.00878 |
| C | 2.17287  | 0.44988  | 0.81876  |
| S | 1.95133  | 1.77374  | 1.85400  |
| S | 3.49480  | -0.58181 | 0.73887  |
| H | 1.68397  | -6.46913 | 3.09778  |
| H | -0.29378 | -8.49354 | 5.57143  |
| H | 1.23286  | -7.64011 | 5.30429  |
| H | 0.36830  | -8.34713 | 3.93719  |
| H | -2.38916 | -6.86009 | 5.90562  |
| H | -3.62094 | -4.20752 | 6.08640  |
| H | -4.11927 | -4.49384 | 4.41756  |
| H | -3.12090 | -3.08003 | 4.80719  |
| H | 2.73896  | -6.88910 | 0.76108  |
| H | 1.70843  | -7.70854 | -0.41945 |
| H | 1.46661  | -7.98229 | 1.31199  |
| H | -0.24436 | -6.17781 | -1.41068 |
| H | -1.92532 | -2.79060 | -0.36869 |
| H | -2.89062 | -4.27778 | -0.30313 |
| H | -1.86145 | -3.96328 | -1.70205 |
| H | 3.63944  | -6.49288 | 4.57974  |
| H | 5.13380  | -5.60094 | 4.25810  |
| H | 4.16190  | -6.21996 | 2.91615  |
| H | 4.84422  | -2.97803 | 4.62184  |
| H | 1.74784  | -0.44882 | 4.20617  |
| H | 3.35236  | -0.34137 | 3.50573  |
| H | 3.16380  | -0.59469 | 5.25736  |
| H | -0.67740 | -3.03642 | 6.50942  |
| H | -0.00504 | -1.81050 | 7.59284  |
| H | 0.76092  | -2.12019 | 6.03724  |
| H | -1.13367 | 1.81397  | 5.87663  |
| H | 0.42114  | 1.06542  | 5.50734  |
| H | -0.18869 | 1.07119  | 7.17238  |
| H | -3.55230 | 0.13865  | 6.74481  |
| H | -2.60173 | -0.68612 | 7.98281  |
| H | -3.49110 | -1.63072 | 6.78103  |
| H | -4.38666 | 0.97710  | 4.83256  |
| H | -4.23499 | 1.96660  | 3.37695  |
| H | -2.99673 | 2.06356  | 4.63370  |
| H | -3.71098 | -1.90687 | 1.80099  |
| H | -4.74013 | -0.47904 | 1.72502  |
| H | -4.75825 | -1.50284 | 3.17403  |
| H | -0.91573 | 1.37265  | 2.26959  |
| H | -2.32687 | 1.49083  | 1.18039  |
| H | -3.00906 | 5.22204  | -4.21674 |
| H | -1.08696 | 7.09811  | -6.82790 |
| H | -2.41619 | 5.98200  | -6.48421 |
| H | -1.97224 | 7.21294  | -5.30056 |
| H | 1.32277  | 5.99384  | -6.50057 |
| H | 3.26832  | 4.37783  | -4.16246 |
| H | 2.60934  | 2.79067  | -4.59679 |
| H | 3.10264  | 3.92798  | -5.86014 |
| H | -4.57490 | 6.17589  | -2.54637 |
| H | -4.07721 | 7.38121  | -1.35181 |
| H | -3.28162 | 7.31326  | -2.93032 |

---

|   |          |          |          |
|---|----------|----------|----------|
| H | -2.60876 | 6.30065  | 0.60446  |
| H | 0.06720  | 3.32447  | 0.80383  |
| H | 0.00682  | 4.97746  | 1.42785  |
| H | -1.29054 | 3.84881  | 1.79085  |
| H | -4.39172 | 4.02995  | -5.97596 |
| H | -5.71231 | 2.94871  | -5.51076 |
| H | -5.27487 | 4.31412  | -4.47435 |
| H | -4.89795 | 0.64083  | -4.42369 |
| H | -2.53987 | -0.43382 | -1.78708 |
| H | -3.29290 | -1.18594 | -3.20912 |
| H | -1.57239 | -0.74755 | -3.22968 |
| H | 0.27587  | 2.70254  | -6.50863 |
| H | -0.66516 | 1.50426  | -7.40286 |
| H | -1.27780 | 2.13511  | -5.87079 |
| H | -1.70224 | -0.87012 | -5.66627 |
| H | -0.75345 | -1.15437 | -7.12624 |
| H | -0.39261 | -2.06448 | -5.65545 |
| H | 2.65544  | -0.79062 | -6.30326 |
| H | 1.86289  | 0.03048  | -7.65354 |
| H | 2.76386  | 0.96670  | -6.45333 |
| H | 1.91552  | -2.54756 | -5.05927 |
| H | 2.27938  | -3.21997 | -3.46735 |
| H | 0.60093  | -2.94556 | -3.93650 |
| H | 3.86412  | 0.38144  | -2.47381 |
| H | 4.16943  | -1.32678 | -2.74190 |
| H | 3.97184  | -0.23796 | -4.13398 |
| H | 0.20413  | -1.82892 | -1.51836 |
| H | 1.85960  | -1.84620 | -0.85910 |
| H | 3.91341  | 2.72679  | -2.35785 |
| H | 3.23674  | 1.92666  | -0.90469 |
| H | 5.13360  | 3.86789  | -0.59660 |
| H | 3.73456  | 3.79037  | 0.49617  |
| H | 3.53836  | 6.07139  | -0.42954 |
| H | 4.01305  | 5.50803  | -2.03971 |
| H | 1.39538  | 4.98978  | -0.55408 |
| H | 1.60106  | 5.36990  | -2.28044 |

163

Coordination of the second CS<sub>2</sub> adduct

|   |          |          |          |
|---|----------|----------|----------|
| C | 0.93602  | 4.62638  | -4.69643 |
| N | -0.09316 | 3.93940  | -4.17573 |
| N | -1.22579 | 4.41077  | -4.76411 |
| C | -0.92094 | 5.39157  | -5.64696 |
| C | 0.45689  | 5.55793  | -5.62618 |
| Y | -0.18778 | 2.13226  | -2.47693 |
| N | -2.13040 | 3.72668  | -1.92078 |
| N | -2.93510 | 4.18513  | -2.91629 |
| C | -3.95932 | 4.90948  | -2.40380 |
| C | -3.80549 | 4.92607  | -1.02628 |
| C | -2.65307 | 4.17193  | -0.76791 |
| B | -2.63071 | 3.87535  | -4.39386 |
| N | -2.75033 | 2.35872  | -4.65486 |
| N | -2.01730 | 1.43980  | -3.96358 |
| C | -2.41351 | 0.22523  | -4.37999 |
| C | -3.40732 | 0.36646  | -5.35599 |
| C | -3.59936 | 1.73133  | -5.50487 |
| C | -1.86297 | -1.04240 | -3.81918 |
| C | -4.54695 | 2.43666  | -6.41835 |
| C | -2.05004 | 3.86308  | 0.56061  |
| C | -5.03237 | 5.54409  | -3.22604 |
| C | -1.92729 | 6.12250  | -6.47371 |
| C | 2.35342  | 4.37756  | -4.30141 |

---

|    |          |          |          |
|----|----------|----------|----------|
| O  | 0.97496  | 4.19867  | -1.34321 |
| C  | 2.24391  | 4.21203  | -0.64170 |
| C  | 2.22362  | 5.48393  | 0.18602  |
| C  | 1.51944  | 6.45124  | -0.76576 |
| C  | 0.46905  | 5.56118  | -1.42621 |
| N  | 1.28970  | 0.88825  | -3.73060 |
| Si | 2.56491  | 0.01249  | -2.86944 |
| C  | 4.09302  | 1.09918  | -2.53271 |
| P  | -0.01682 | 0.02438  | 1.20940  |
| C  | -0.16726 | 1.29747  | 2.55184  |
| Si | -0.86574 | 0.86146  | 4.28992  |
| C  | 0.01371  | 2.16516  | 5.37028  |
| P  | 1.31849  | 0.91034  | -0.23515 |
| C  | 1.87286  | -0.58533 | -1.20342 |
| Si | 1.38422  | 0.70946  | -5.49845 |
| C  | 0.90725  | -1.03241 | -6.11999 |
| C  | 3.13636  | 1.08269  | -6.17232 |
| C  | 0.25906  | 1.83354  | -6.53707 |
| Y  | -0.63825 | -2.26351 | 2.97351  |
| N  | -0.50533 | -0.82091 | 4.68012  |
| Si | -0.18949 | -1.21559 | 6.37902  |
| C  | 1.49159  | -0.56614 | 6.99213  |
| C  | 3.22996  | -1.59353 | -3.65957 |
| N  | 1.35465  | -3.49846 | 3.50044  |
| N  | 1.25460  | -4.82768 | 3.78652  |
| C  | 2.43300  | -5.27646 | 4.28071  |
| C  | 3.31581  | -4.20305 | 4.30852  |
| C  | 2.60201  | -3.10925 | 3.80699  |
| B  | 0.00220  | -5.65313 | 3.38361  |
| N  | -1.27132 | -5.25492 | 4.18340  |
| N  | -1.85122 | -4.02928 | 4.04693  |
| C  | -3.00874 | -4.04797 | 4.72573  |
| C  | -3.17611 | -5.30486 | 5.31595  |
| C  | -2.05768 | -6.04589 | 4.95073  |
| C  | 2.67902  | -6.68717 | 4.70320  |
| C  | 3.06220  | -1.70744 | 3.57327  |
| C  | -1.73116 | -7.45850 | 5.30722  |
| C  | -3.91132 | -2.85849 | 4.76788  |
| N  | -0.59294 | -4.24354 | 1.36325  |
| N  | -0.26980 | -5.46488 | 1.88062  |
| C  | -0.29057 | -6.41016 | 0.91003  |
| C  | -0.63917 | -5.77981 | -0.27346 |
| C  | -0.82310 | -4.42974 | 0.05407  |
| C  | -1.24116 | -3.33174 | -0.86420 |
| C  | 0.02204  | -7.85262 | 1.13731  |
| C  | -2.71346 | 1.27731  | 4.38743  |
| C  | -1.53926 | -0.53723 | 7.54148  |
| C  | -0.13136 | -3.08358 | 6.71329  |
| S  | -2.76778 | -1.07068 | 1.53795  |
| C  | -1.75878 | -0.08604 | 0.55602  |
| S  | -2.24648 | 0.61761  | -0.87964 |
| C  | 10.60526 | -1.08636 | -2.45258 |
| S  | 11.64005 | -0.07585 | -1.86942 |
| S  | 9.57070  | -2.09578 | -3.03555 |
| H  | 0.23087  | -6.80611 | 3.60637  |
| H  | -2.49855 | -7.84898 | 5.97927  |
| H  | -0.76483 | -7.53804 | 5.81375  |
| H  | -1.69432 | -8.10372 | 4.42407  |
| H  | -4.00112 | -5.63769 | 5.92929  |
| H  | -4.62239 | -2.94806 | 5.59268  |
| H  | -4.48534 | -2.76200 | 3.83952  |

---

|   |          |          |          |
|---|----------|----------|----------|
| H | -3.34309 | -1.93302 | 4.90641  |
| H | 1.03506  | -7.99574 | 1.52642  |
| H | -0.05365 | -8.39220 | 0.19053  |
| H | -0.67117 | -8.31687 | 1.84582  |
| H | -0.74568 | -6.23656 | -1.24698 |
| H | -2.28029 | -3.03628 | -0.68589 |
| H | -1.14957 | -3.66016 | -1.90219 |
| H | -0.62560 | -2.43759 | -0.73832 |
| H | 1.97564  | -7.00796 | 5.47739  |
| H | 3.68971  | -6.77327 | 5.10820  |
| H | 2.58826  | -7.38602 | 3.86597  |
| H | 4.34222  | -4.21822 | 4.64584  |
| H | 3.26393  | -1.52796 | 2.51148  |
| H | 3.98286  | -1.50915 | 4.12732  |
| H | 2.30496  | -0.98616 | 3.89687  |
| H | -1.10256 | -3.56743 | 6.58157  |
| H | 0.17209  | -3.22085 | 7.75842  |
| H | 0.60094  | -3.60028 | 6.08685  |
| H | 1.57064  | 0.52263  | 6.95475  |
| H | 2.30778  | -0.98736 | 6.39663  |
| H | 1.64674  | -0.87793 | 8.03183  |
| H | -1.61233 | 0.55426  | 7.52368  |
| H | -1.32518 | -0.83722 | 8.57401  |
| H | -2.52129 | -0.94254 | 7.27501  |
| H | -0.28668 | 2.13552  | 6.42165  |
| H | -0.24609 | 3.15917  | 4.98582  |
| H | 1.10263  | 2.06606  | 5.32175  |
| H | -3.30041 | 0.66585  | 3.69708  |
| H | -2.88564 | 2.33145  | 4.14079  |
| H | -3.08483 | 1.10801  | 5.40388  |
| H | 0.88047  | 1.57079  | 2.73570  |
| H | -0.66026 | 2.19588  | 2.16794  |
| H | -3.43531 | 4.43862  | -5.07777 |
| H | -1.41324 | 6.84064  | -7.11680 |
| H | -2.49919 | 5.44385  | -7.11336 |
| H | -2.64345 | 6.67333  | -5.85613 |
| H | 1.03650  | 6.24915  | -6.22148 |
| H | 3.01771  | 4.55782  | -5.15131 |
| H | 2.66915  | 5.04744  | -3.49431 |
| H | 2.49262  | 3.34496  | -3.97039 |
| H | -5.61136 | 4.80030  | -3.78243 |
| H | -5.72034 | 6.08232  | -2.56988 |
| H | -4.62970 | 6.25651  | -3.95256 |
| H | -4.44732 | 5.41321  | -0.30604 |
| H | -0.98291 | 3.64449  | 0.46968  |
| H | -2.17319 | 4.70897  | 1.24431  |
| H | -2.53472 | 2.99179  | 1.01297  |
| H | -4.02564 | 3.10173  | -7.11361 |
| H | -5.09763 | 1.69867  | -7.00611 |
| H | -5.27400 | 3.04097  | -5.86723 |
| H | -3.92237 | -0.42319 | -5.88397 |
| H | -2.39508 | -1.31808 | -2.90299 |
| H | -1.98015 | -1.85587 | -4.54021 |
| H | -0.80062 | -0.94010 | -3.58188 |
| H | 0.57714  | 2.87822  | -6.54421 |
| H | 0.31739  | 1.45916  | -7.56703 |
| H | -0.78689 | 1.79041  | -6.22783 |
| H | 1.18476  | -1.11782 | -7.17766 |
| H | 1.38805  | -1.85059 | -5.58116 |
| H | -0.17614 | -1.17193 | -6.05749 |
| H | 3.92018  | 0.43947  | -5.76266 |

---

|   |          |          |          |
|---|----------|----------|----------|
| H | 3.13801  | 0.95118  | -7.26105 |
| H | 3.41792  | 2.12088  | -5.96835 |
| H | 3.63452  | -1.48086 | -4.66823 |
| H | 4.03935  | -1.96126 | -3.01701 |
| H | 2.45759  | -2.36869 | -3.68590 |
| H | 3.83670  | 1.97389  | -1.92706 |
| H | 4.85330  | 0.52998  | -1.98508 |
| H | 4.54126  | 1.45016  | -3.46804 |
| H | 1.04654  | -1.26166 | -1.45148 |
| H | 2.63191  | -1.16173 | -0.66071 |
| H | 3.05647  | 4.23814  | -1.38009 |
| H | 2.31302  | 3.28433  | -0.07094 |
| H | 3.22728  | 5.80851  | 0.47398  |
| H | 1.63512  | 5.33652  | 1.09864  |
| H | 1.06597  | 7.30943  | -0.26192 |
| H | 2.22897  | 6.83539  | -1.50735 |
| H | -0.48394 | 5.59433  | -0.89417 |
| H | 0.28837  | 5.80243  | -2.47520 |

163

Coordination of the second CS<sub>2</sub> TS

|    |          |          |          |
|----|----------|----------|----------|
| C  | 4.88984  | 15.43750 | -4.86923 |
| N  | 3.91076  | 14.74764 | -4.26193 |
| N  | 2.72963  | 15.23033 | -4.73411 |
| C  | 2.95418  | 16.22107 | -5.62942 |
| C  | 4.32884  | 16.38235 | -5.73724 |
| Y  | 3.98550  | 12.93293 | -2.58767 |
| N  | 2.09921  | 14.49242 | -1.82659 |
| N  | 1.21032  | 14.98207 | -2.73177 |
| C  | 0.25226  | 15.71068 | -2.10966 |
| C  | 0.53613  | 15.69523 | -0.75275 |
| C  | 1.69496  | 14.91918 | -0.62017 |
| B  | 1.36616  | 14.69199 | -4.23625 |
| N  | 1.22388  | 13.17872 | -4.50271 |
| N  | 2.03217  | 12.25476 | -3.90828 |
| C  | 1.60173  | 11.04304 | -4.30162 |
| C  | 0.50956  | 11.19315 | -5.16442 |
| C  | 0.29409  | 12.55863 | -5.26904 |
| C  | 2.21440  | 9.76769  | -3.82874 |
| C  | -0.74990 | 13.27054 | -6.06476 |
| C  | 2.41336  | 14.56788 | 0.63848  |
| C  | -0.88107 | 16.38064 | -2.81418 |
| C  | 1.87732  | 16.96449 | -6.34894 |
| C  | 6.33670  | 15.17351 | -4.61674 |
| O  | 5.24466  | 14.91479 | -1.55560 |
| C  | 6.58086  | 14.89646 | -0.98240 |
| C  | 6.70088  | 16.19209 | -0.20160 |
| C  | 5.90027  | 17.15513 | -1.07709 |
| C  | 4.74120  | 16.28225 | -1.54350 |
| N  | 5.29973  | 11.69094 | -3.98469 |
| Si | 6.62060  | 10.76642 | -3.24919 |
| C  | 8.19260  | 11.81460 | -3.03754 |
| P  | 4.43899  | 10.63799 | 1.11813  |
| C  | 4.38333  | 11.92260 | 2.44674  |
| Si | 3.64061  | 11.56563 | 4.18639  |
| C  | 4.57327  | 12.84753 | 5.24325  |
| P  | 5.68023  | 11.56037 | -0.43261 |
| C  | 6.05569  | 10.13786 | -1.54049 |
| Si | 5.24543  | 11.53591 | -5.75937 |
| C  | 4.68392  | 9.81037  | -6.35501 |
| C  | 6.94643  | 11.88597 | -6.56053 |
| C  | 4.05569  | 12.68580 | -6.69036 |

---

|    |          |          |          |
|----|----------|----------|----------|
| Y  | 3.75503  | 8.37933  | 2.98405  |
| N  | 3.89739  | 9.87728  | 4.63358  |
| Si | 4.09482  | 9.52578  | 6.36381  |
| C  | 5.77179  | 10.09858 | 7.05685  |
| C  | 7.17755  | 9.15610  | -4.11002 |
| N  | 5.55801  | 6.96562  | 3.69622  |
| N  | 5.31906  | 5.64901  | 3.95861  |
| C  | 6.41796  | 5.08990  | 4.51846  |
| C  | 7.39153  | 6.07687  | 4.61592  |
| C  | 6.81423  | 7.23600  | 4.08653  |
| B  | 4.00877  | 4.95494  | 3.50621  |
| N  | 2.75297  | 5.51481  | 4.23488  |
| N  | 2.30718  | 6.78747  | 4.03032  |
| C  | 1.13348  | 6.91422  | 4.67041  |
| C  | 0.82167  | 5.70745  | 5.30443  |
| C  | 1.86823  | 4.84209  | 5.00703  |
| C  | 6.50718  | 3.65881  | 4.93433  |
| C  | 7.41567  | 8.58894  | 3.90120  |
| C  | 2.04036  | 3.42176  | 5.43339  |
| C  | 0.35110  | 8.18540  | 4.63629  |
| N  | 3.70874  | 6.36741  | 1.42353  |
| N  | 3.83017  | 5.13074  | 1.98736  |
| C  | 3.72037  | 4.16780  | 1.04036  |
| C  | 3.52310  | 4.80274  | -0.17554 |
| C  | 3.51853  | 6.17441  | 0.10945  |
| C  | 3.30944  | 7.29842  | -0.84681 |
| C  | 3.80991  | 2.70376  | 1.32006  |
| C  | 1.81821  | 12.09344 | 4.21957  |
| C  | 2.72911  | 10.33300 | 7.42014  |
| C  | 4.01250  | 7.67221  | 6.76558  |
| S  | 1.67851  | 9.60001  | 1.48670  |
| C  | 2.67669  | 10.59052 | 0.51002  |
| S  | 2.12926  | 11.37220 | -0.86364 |
| C  | 8.02700  | 11.55339 | 0.99282  |
| S  | 8.01804  | 12.89324 | 1.86850  |
| S  | 8.72402  | 10.20186 | 0.51559  |
| H  | 4.09571  | 3.78974  | 3.76277  |
| H  | 1.21692  | 3.13931  | 6.09303  |
| H  | 2.97747  | 3.27191  | 5.97747  |
| H  | 2.04158  | 2.73650  | 4.58022  |
| H  | -0.05054 | 5.48698  | 5.90290  |
| H  | -0.34624 | 8.22617  | 5.47666  |
| H  | -0.23182 | 8.26679  | 3.71215  |
| H  | 1.00829  | 9.05847  | 4.69356  |
| H  | 4.76941  | 2.43060  | 1.77010  |
| H  | 3.70682  | 2.14964  | 0.38439  |
| H  | 3.02013  | 2.36766  | 1.99929  |
| H  | 3.40125  | 4.33399  | -1.14150 |
| H  | 2.27446  | 7.65501  | -0.82162 |
| H  | 3.53678  | 6.97540  | -1.86579 |
| H  | 3.95369  | 8.14747  | -0.60762 |
| H  | 5.73462  | 3.39807  | 5.66384  |
| H  | 7.48132  | 3.47462  | 5.39252  |
| H  | 6.39869  | 2.97974  | 4.08308  |
| H  | 8.38928  | 5.96490  | 5.01508  |
| H  | 7.81720  | 8.70993  | 2.88927  |
| H  | 8.23891  | 8.74454  | 4.60261  |
| H  | 6.67411  | 9.37703  | 4.06765  |
| H  | 3.02979  | 7.23651  | 6.56748  |
| H  | 4.21501  | 7.56144  | 7.83804  |
| H  | 4.76632  | 7.09092  | 6.22772  |

---

|   |          |          |          |
|---|----------|----------|----------|
| H | 5.93641  | 11.17252 | 6.94558  |
| H | 6.59879  | 9.57704  | 6.56527  |
| H | 5.82116  | 9.86101  | 8.12617  |
| H | 2.72419  | 11.42507 | 7.35398  |
| H | 2.87534  | 10.06841 | 8.47393  |
| H | 1.73828  | 9.97391  | 7.12246  |
| H | 4.24946  | 12.86629 | 6.28789  |
| H | 4.38184  | 13.84302 | 4.82459  |
| H | 5.65471  | 12.68245 | 5.21947  |
| H | 1.20966  | 11.49871 | 3.53305  |
| H | 1.72357  | 13.14749 | 3.93344  |
| H | 1.40884  | 11.98452 | 5.22916  |
| H | 5.44548  | 12.13085 | 2.63589  |
| H | 3.95472  | 12.85015 | 2.05521  |
| H | 0.49984  | 15.26428 | -4.83144 |
| H | 2.33101  | 17.69292 | -7.02487 |
| H | 1.24906  | 16.29522 | -6.94415 |
| H | 1.22089  | 17.50512 | -5.66013 |
| H | 4.85217  | 17.07873 | -6.37700 |
| H | 6.91292  | 15.33237 | -5.53261 |
| H | 6.74331  | 15.84886 | -3.85650 |
| H | 6.49557  | 14.14299 | -4.28795 |
| H | -1.52085 | 15.65985 | -3.33281 |
| H | -1.49681 | 16.91275 | -2.08539 |
| H | -0.53381 | 17.10505 | -3.55732 |
| H | -0.02633 | 16.17636 | 0.03471  |
| H | 3.46331  | 14.33330 | 0.44469  |
| H | 2.37086  | 15.39766 | 1.35096  |
| H | 1.95654  | 13.69339 | 1.11307  |
| H | -0.31063 | 13.95212 | -6.79947 |
| H | -1.35411 | 12.53742 | -6.60398 |
| H | -1.41953 | 13.85827 | -5.42929 |
| H | -0.05363 | 10.40804 | -5.64813 |
| H | 1.79209  | 9.47551  | -2.86157 |
| H | 2.01449  | 8.96630  | -4.54486 |
| H | 3.29713  | 9.87005  | -3.71595 |
| H | 4.36694  | 13.73223 | -6.69482 |
| H | 4.04683  | 12.33507 | -7.73039 |
| H | 3.03271  | 12.62619 | -6.31319 |
| H | 4.95980  | 9.69294  | -7.40988 |
| H | 5.11909  | 8.97751  | -5.80047 |
| H | 3.59428  | 9.73114  | -6.29388 |
| H | 7.74130  | 11.21442 | -6.22481 |
| H | 6.85983  | 11.77549 | -7.64817 |
| H | 7.27227  | 12.91189 | -6.36014 |
| H | 7.49872  | 9.27417  | -5.14757 |
| H | 8.03216  | 8.77112  | -3.54063 |
| H | 6.39466  | 8.39171  | -4.08002 |
| H | 8.01506  | 12.69552 | -2.41323 |
| H | 8.98401  | 11.22790 | -2.55922 |
| H | 8.56020  | 12.15812 | -4.01015 |
| H | 5.18740  | 9.49255  | -1.71418 |
| H | 6.85690  | 9.52572  | -1.09582 |
| H | 7.30919  | 14.85861 | -1.80181 |
| H | 6.67532  | 13.99429 | -0.37809 |
| H | 7.74250  | 16.49110 | -0.05997 |
| H | 6.23976  | 16.08595 | 0.78645  |
| H | 5.54932  | 18.04312 | -0.54397 |
| H | 6.50521  | 17.49126 | -1.92691 |
| H | 3.90127  | 16.32430 | -0.84616 |
| H | 4.37677  | 16.52286 | -2.54281 |

Coordination of the second CS<sub>2</sub> product

|    |          |          |          |
|----|----------|----------|----------|
| C  | 2.70745  | -2.76547 | 4.03496  |
| N  | 1.51620  | -3.25683 | 3.65219  |
| N  | 1.49136  | -4.58362 | 3.97453  |
| C  | 2.66153  | -4.92799 | 4.56321  |
| C  | 3.45852  | -3.79132 | 4.61855  |
| Y  | -0.50582 | -2.20805 | 2.97002  |
| N  | -0.61334 | -0.67235 | 4.58003  |
| Si | -0.36818 | -0.98300 | 6.31595  |
| C  | -1.85017 | -0.39629 | 7.36087  |
| B  | 0.32388  | -5.50684 | 3.54496  |
| N  | -1.01896 | -5.16478 | 4.25859  |
| N  | -1.67071 | -3.98818 | 4.03845  |
| C  | -2.86315 | -4.05933 | 4.65067  |
| C  | -2.98083 | -5.30045 | 5.28333  |
| C  | -1.79545 | -5.97655 | 5.01360  |
| C  | -3.84300 | -2.93388 | 4.58350  |
| C  | -1.39770 | -7.34777 | 5.44989  |
| C  | 2.98103  | -6.30393 | 5.04645  |
| C  | 3.08399  | -1.34055 | 3.80375  |
| N  | -0.31421 | -4.25956 | 1.42459  |
| C  | -0.51234 | -4.55351 | 0.12871  |
| C  | -0.19714 | -5.89745 | -0.10905 |
| C  | 0.19359  | -6.41515 | 1.11491  |
| N  | 0.11224  | -5.41245 | 2.02227  |
| C  | -1.02855 | -3.57339 | -0.87004 |
| C  | 0.63914  | -7.80382 | 1.43565  |
| S  | -2.49275 | -1.13231 | 1.23367  |
| C  | -1.42792 | -0.15855 | 0.30710  |
| P  | 0.13232  | 0.15408  | 1.24872  |
| C  | -0.38021 | 1.47459  | 2.41134  |
| Si | -1.08335 | 0.97372  | 4.13977  |
| C  | -0.37858 | 2.36037  | 5.23530  |
| S  | -1.75865 | 0.39657  | -1.23364 |
| Y  | 0.13983  | 2.25091  | -2.79759 |
| N  | 1.50780  | 0.78759  | -3.86413 |
| Si | 2.34913  | -0.52561 | -3.01410 |
| C  | 1.84371  | -0.58307 | -1.16682 |
| P  | 1.45626  | 1.00229  | -0.33197 |
| C  | 2.98098  | 1.50113  | 0.65508  |
| S  | 2.74598  | 2.96123  | 1.47479  |
| N  | -0.34654 | 4.23585  | -4.32807 |
| C  | 0.38062  | 5.14611  | -5.00384 |
| C  | -0.44430 | 6.18851  | -5.43935 |
| C  | -1.71980 | 5.86239  | -5.00652 |
| N  | -1.63578 | 4.68316  | -4.34830 |
| C  | 1.83402  | 4.99106  | -5.29534 |
| C  | -2.98565 | 6.63173  | -5.19536 |
| B  | -2.79954 | 3.89055  | -3.72142 |
| N  | -2.66422 | 3.90650  | -2.18093 |
| N  | -1.44296 | 3.88688  | -1.56019 |
| C  | -1.65864 | 4.26848  | -0.28917 |
| C  | -3.02613 | 4.49100  | -0.08119 |
| C  | -3.63518 | 4.25383  | -1.30190 |
| C  | -5.08289 | 4.34277  | -1.65340 |
| C  | -0.56559 | 4.53176  | 0.69007  |
| N  | -1.87809 | 1.54863  | -4.02823 |
| N  | -2.85168 | 2.46428  | -4.29442 |
| C  | -3.82030 | 1.91135  | -5.06073 |
| C  | -3.46613 | 0.59073  | -5.28962 |



---

|    |          |          |          |
|----|----------|----------|----------|
| C  | -2.25277 | 0.39876  | -4.62092 |
| C  | -1.48032 | -0.86955 | -4.50810 |
| C  | -5.02442 | 2.64412  | -5.55355 |
| O  | 2.04675  | 3.70152  | -2.32390 |
| C  | 3.44210  | 3.26699  | -2.32281 |
| C  | 4.24426  | 4.41452  | -1.71696 |
| C  | 3.34205  | 5.63128  | -1.93887 |
| C  | 1.96213  | 5.03066  | -1.74085 |
| S  | 4.35046  | 0.54507  | 0.59898  |
| C  | -2.96445 | 1.22956  | 4.11252  |
| Si | 1.88411  | 0.89276  | -5.60365 |
| C  | 3.53088  | 1.78457  | -5.96304 |
| C  | 0.50537  | 1.75837  | -6.58267 |
| C  | 2.07985  | -0.78004 | -6.49785 |
| C  | 1.89108  | -2.30081 | -3.54412 |
| C  | 4.24089  | -0.43535 | -3.13300 |
| C  | -0.16741 | -2.82494 | 6.72994  |
| C  | 1.20402  | -0.17218 | 7.01300  |
| H  | 0.61470  | -6.62972 | 3.83556  |
| H  | -2.17594 | -7.76290 | 6.09400  |
| H  | -0.45994 | -7.33987 | 6.01300  |
| H  | -1.26586 | -8.02346 | 4.59932  |
| H  | -3.81617 | -5.66547 | 5.86341  |
| H  | -4.55805 | -2.99824 | 5.40726  |
| H  | -4.41129 | -2.95808 | 3.64669  |
| H  | -3.33880 | -1.96398 | 4.64666  |
| H  | 1.64404  | -7.81983 | 1.86872  |
| H  | 0.65796  | -8.39787 | 0.51918  |
| H  | -0.03257 | -8.29887 | 2.14408  |
| H  | -0.24674 | -6.42310 | -1.05187 |
| H  | -0.45915 | -2.64178 | -0.86223 |
| H  | -2.07302 | -3.31115 | -0.67458 |
| H  | -0.95981 | -3.99912 | -1.87367 |
| H  | 2.25643  | -6.65351 | 5.78797  |
| H  | 3.96858  | -6.30341 | 5.51281  |
| H  | 2.99285  | -7.03092 | 4.22865  |
| H  | 4.45658  | -3.71957 | 5.02595  |
| H  | 3.44274  | -1.17595 | 2.78105  |
| H  | 3.88702  | -1.04134 | 4.48132  |
| H  | 2.23240  | -0.67394 | 3.97293  |
| H  | -1.07394 | -3.40837 | 6.55125  |
| H  | 0.06269  | -2.88603 | 7.80076  |
| H  | 0.66152  | -3.29088 | 6.19038  |
| H  | 1.20583  | 0.91660  | 6.93171  |
| H  | 2.09504  | -0.55112 | 6.50306  |
| H  | 1.29713  | -0.42930 | 8.07497  |
| H  | -2.02272 | 0.68206  | 7.29838  |
| H  | -1.67557 | -0.64133 | 8.41512  |
| H  | -2.77101 | -0.90177 | 7.05103  |
| H  | -0.70776 | 2.30818  | 6.27668  |
| H  | -0.72464 | 3.31887  | 4.82981  |
| H  | 0.71514  | 2.37239  | 5.21581  |
| H  | -3.45508 | 0.57824  | 3.38405  |
| H  | -3.20147 | 2.26706  | 3.84943  |
| H  | -3.39165 | 1.03112  | 5.10117  |
| H  | 0.54556  | 2.04006  | 2.59923  |
| H  | -1.07691 | 2.15300  | 1.91032  |
| H  | -3.82356 | 4.43736  | -4.01407 |
| H  | -2.77025 | 7.55224  | -5.74276 |
| H  | -3.72828 | 6.06429  | -5.76428 |
| H  | -3.44235 | 6.90377  | -4.23896 |

---

|   |          |          |          |
|---|----------|----------|----------|
| H | -0.15164 | 7.06121  | -6.00552 |
| H | 1.98490  | 4.51703  | -6.27118 |
| H | 2.32301  | 5.96893  | -5.32668 |
| H | 2.32659  | 4.37929  | -4.54139 |
| H | -5.45333 | 3.39943  | -2.06673 |
| H | -5.66251 | 4.56729  | -0.75522 |
| H | -5.27956 | 5.12772  | -2.39095 |
| H | -3.50652 | 4.80021  | 0.83615  |
| H | 0.26990  | 3.82958  | 0.62483  |
| H | -0.16333 | 5.54131  | 0.54210  |
| H | -0.95325 | 4.49358  | 1.71104  |
| H | -4.75296 | 3.47584  | -6.21142 |
| H | -5.65625 | 1.95808  | -6.12229 |
| H | -5.62076 | 3.05461  | -4.73356 |
| H | -4.01935 | -0.14112 | -5.86049 |
| H | -1.80880 | -1.43796 | -3.63008 |
| H | -1.64175 | -1.49217 | -5.39257 |
| H | -0.41277 | -0.66869 | -4.40004 |
| H | 0.18669  | 2.71843  | -6.17267 |
| H | 0.86335  | 1.92580  | -7.60576 |
| H | -0.38017 | 1.11787  | -6.64090 |
| H | 2.15806  | -0.56865 | -7.57132 |
| H | 2.98593  | -1.31890 | -6.20684 |
| H | 1.22175  | -1.44252 | -6.35247 |
| H | 4.36917  | 1.26542  | -5.48914 |
| H | 3.71082  | 1.78515  | -7.04495 |
| H | 3.54702  | 2.82337  | -5.62660 |
| H | 2.29513  | -2.58975 | -4.51589 |
| H | 2.30987  | -2.98435 | -2.79509 |
| H | 0.80858  | -2.45787 | -3.56260 |
| H | 4.64017  | 0.53470  | -2.82854 |
| H | 4.67487  | -1.18825 | -2.46659 |
| H | 4.58469  | -0.64987 | -4.15059 |
| H | 0.94349  | -1.20696 | -1.13202 |
| H | 2.64254  | -1.08304 | -0.60137 |
| H | 3.71395  | 3.05334  | -3.35968 |
| H | 3.52472  | 2.35012  | -1.73756 |
| H | 5.22486  | 4.51486  | -2.18975 |
| H | 4.39015  | 4.23973  | -0.64672 |
| H | 3.53763  | 6.43889  | -1.22825 |
| H | 3.45433  | 6.03035  | -2.95235 |
| H | 1.73911  | 4.91799  | -0.67714 |
| H | 1.14930  | 5.55494  | -2.24770 |

163

CS insertion into the P-P bond TS

|    |          |          |         |
|----|----------|----------|---------|
| C  | 2.30525  | -3.14663 | 5.27527 |
| N  | 1.29796  | -3.73478 | 4.61177 |
| N  | 1.26177  | -5.04372 | 4.99174 |
| C  | 2.23676  | -5.27993 | 5.90222 |
| C  | 2.92067  | -4.08810 | 6.10835 |
| Y  | -0.48471 | -2.87119 | 3.23638 |
| N  | -1.07375 | -1.15384 | 4.56262 |
| Si | -1.37278 | -1.27491 | 6.30404 |
| C  | -3.09950 | -0.63415 | 6.79763 |
| B  | 0.34309  | -6.07282 | 4.27656 |
| N  | -1.16819 | -5.81214 | 4.53499 |
| N  | -1.80888 | -4.70732 | 4.05530 |
| C  | -3.11470 | -4.84329 | 4.33559 |
| C  | -3.31927 | -6.05156 | 5.00973 |
| C  | -2.06559 | -6.64114 | 5.11840 |
| C  | -4.12051 | -3.81207 | 3.94085 |

---

|    |          |          |          |
|----|----------|----------|----------|
| C  | -1.71354 | -7.94717 | 5.75068  |
| C  | 2.48384  | -6.60989 | 6.53393  |
| C  | 2.65913  | -1.71392 | 5.04609  |
| N  | 0.45087  | -4.89927 | 2.03218  |
| C  | 0.79414  | -5.19333 | 0.76907  |
| C  | 1.19171  | -6.53452 | 0.68640  |
| C  | 1.07355  | -7.04209 | 1.97085  |
| N  | 0.62706  | -6.03754 | 2.76327  |
| C  | 0.75079  | -4.18788 | -0.33199 |
| C  | 1.36638  | -8.42416 | 2.45460  |
| S  | -2.29369 | -2.38459 | 1.11032  |
| C  | -1.49542 | -1.09312 | 0.31581  |
| P  | 0.18804  | -0.81387 | 1.29001  |
| C  | -0.32032 | 0.67453  | 2.25053  |
| Si | -1.45120 | 0.38532  | 3.78725  |
| C  | -1.06538 | 1.93525  | 4.82993  |
| S  | -2.04471 | -0.17221 | -0.92061 |
| Y  | 0.26445  | 2.52764  | -3.32413 |
| N  | 1.33012  | 0.95584  | -4.55096 |
| Si | 2.08542  | -0.43249 | -3.73953 |
| C  | 1.20015  | -0.76816 | -2.08698 |
| P  | 0.88238  | 0.75746  | -1.06064 |
| C  | 2.41631  | 0.79836  | -0.03993 |
| S  | 3.60394  | 1.95703  | 0.02082  |
| N  | -0.55234 | 4.58913  | -4.55972 |
| C  | -0.01272 | 5.46976  | -5.42337 |
| C  | -0.92166 | 6.50212  | -5.67719 |
| C  | -2.04947 | 6.20016  | -4.92782 |
| N  | -1.80352 | 5.04437  | -4.26755 |
| C  | 1.34207  | 5.29525  | -6.02550 |
| C  | -3.32216 | 6.97431  | -4.82436 |
| B  | -2.75993 | 4.29071  | -3.30791 |
| N  | -2.19800 | 4.31443  | -1.87338 |
| N  | -0.91909 | 3.93064  | -1.58447 |
| C  | -0.71104 | 4.22483  | -0.29022 |
| C  | -1.86945 | 4.78888  | 0.26028  |
| C  | -2.79406 | 4.82889  | -0.76982 |
| C  | -4.20248 | 5.32300  | -0.72781 |
| C  | 0.58765  | 3.99556  | 0.40438  |
| N  | -2.01797 | 1.91907  | -3.89136 |
| N  | -3.00970 | 2.85566  | -3.81173 |
| C  | -4.18038 | 2.33027  | -4.24253 |
| C  | -3.94068 | 1.01546  | -4.60909 |
| C  | -2.58126 | 0.79255  | -4.37203 |
| C  | -1.83475 | -0.48211 | -4.57064 |
| C  | -5.47117 | 3.07899  | -4.29500 |
| O  | 2.13204  | 4.02364  | -3.04635 |
| C  | 3.52347  | 3.59453  | -3.18864 |
| C  | 4.35553  | 4.72341  | -2.60208 |
| C  | 3.47974  | 5.95323  | -2.84793 |
| C  | 2.08615  | 5.40494  | -2.58971 |
| S  | 2.41888  | -0.55044 | 1.08790  |
| C  | -3.26407 | 0.54646  | 3.25541  |
| Si | 1.45592  | 1.12532  | -6.30717 |
| C  | 3.06840  | 1.99286  | -6.84074 |
| C  | -0.03821 | 2.09663  | -6.97914 |
| C  | 1.42222  | -0.46616 | -7.35312 |
| C  | 1.95217  | -2.10989 | -4.63773 |
| C  | 3.93895  | -0.18588 | -3.40234 |
| C  | -1.29513 | -3.06255 | 6.94307  |
| C  | -0.09658 | -0.33375 | 7.35836  |

---

|   |          |          |          |
|---|----------|----------|----------|
| H | 0.60456  | -7.15967 | 4.70253  |
| H | -2.61312 | -8.39619 | 6.17760  |
| H | -0.98120 | -7.82683 | 6.55454  |
| H | -1.29400 | -8.65177 | 5.02612  |
| H | -4.25569 | -6.44957 | 5.37351  |
| H | -5.03490 | -3.93166 | 4.52722  |
| H | -4.38518 | -3.89797 | 2.88145  |
| H | -3.74084 | -2.79856 | 4.10313  |
| H | 2.14139  | -8.43279 | 3.22740  |
| H | 1.71787  | -9.03305 | 1.61852  |
| H | 0.47852  | -8.90820 | 2.87376  |
| H | 1.52497  | -7.06522 | -0.19399 |
| H | 1.43679  | -3.35732 | -0.13628 |
| H | -0.25291 | -3.76978 | -0.45172 |
| H | 1.04577  | -4.65244 | -1.27591 |
| H | 1.59339  | -6.98929 | 7.04389  |
| H | 3.28376  | -6.51857 | 7.27204  |
| H | 2.78614  | -7.36082 | 5.79740  |
| H | 3.75833  | -3.92913 | 6.77215  |
| H | 3.31848  | -1.60444 | 4.17780  |
| H | 3.18084  | -1.30160 | 5.91342  |
| H | 1.76315  | -1.11080 | 4.86745  |
| H | -2.10806 | -3.68890 | 6.56614  |
| H | -1.38315 | -3.02414 | 8.03572  |
| H | -0.34490 | -3.54985 | 6.70707  |
| H | -0.05192 | 0.73292  | 7.12594  |
| H | 0.90506  | -0.75304 | 7.22244  |
| H | -0.35553 | -0.43584 | 8.41903  |
| H | -3.22657 | 0.43679  | 6.61230  |
| H | -3.26359 | -0.80497 | 7.86817  |
| H | -3.88661 | -1.16424 | 6.25108  |
| H | -1.66941 | 2.00583  | 5.73953  |
| H | -1.28327 | 2.82313  | 4.22403  |
| H | -0.00962 | 1.97892  | 5.11587  |
| H | -3.55543 | -0.25390 | 2.57018  |
| H | -3.42551 | 1.50349  | 2.74641  |
| H | -3.92450 | 0.51201  | 4.12811  |
| H | 0.60256  | 1.11845  | 2.64130  |
| H | -0.79234 | 1.39822  | 1.57705  |
| H | -3.80784 | 4.86668  | -3.30851 |
| H | -3.25564 | 7.86479  | -5.45363 |
| H | -4.18507 | 6.38899  | -5.15544 |
| H | -3.51917 | 7.29867  | -3.79812 |
| H | -0.78193 | 7.35522  | -6.32574 |
| H | 1.27854  | 4.81786  | -7.00916 |
| H | 1.82807  | 6.26580  | -6.16189 |
| H | 1.98093  | 4.67506  | -5.39564 |
| H | -4.91485 | 4.53454  | -0.98964 |
| H | -4.43560 | 5.66303  | 0.28372  |
| H | -4.36906 | 6.15912  | -1.41394 |
| H | -2.01638 | 5.12335  | 1.27731  |
| H | 1.35003  | 3.58413  | -0.25863 |
| H | 0.96655  | 4.93303  | 0.82783  |
| H | 0.47323  | 3.29244  | 1.23382  |
| H | -5.41548 | 3.94365  | -4.96356 |
| H | -6.25659 | 2.41616  | -4.66483 |
| H | -5.77287 | 3.44344  | -3.30867 |
| H | -4.66152 | 0.30496  | -4.98692 |
| H | -1.96235 | -1.13573 | -3.70044 |
| H | -2.21991 | -1.01199 | -5.44671 |
| H | -0.76707 | -0.29561 | -4.70661 |

---

|   |          |          |          |
|---|----------|----------|----------|
| H | -0.29092 | 3.01533  | -6.44482 |
| H | 0.14882  | 2.36066  | -8.02703 |
| H | -0.92615 | 1.45579  | -6.95462 |
| H | 1.28315  | -0.16239 | -8.39811 |
| H | 2.35219  | -1.03756 | -7.30084 |
| H | 0.59605  | -1.13265 | -7.09044 |
| H | 3.93739  | 1.41475  | -6.50797 |
| H | 3.11699  | 2.06390  | -7.93381 |
| H | 3.16781  | 3.00473  | -6.43802 |
| H | 2.63619  | -2.20921 | -5.48391 |
| H | 2.22120  | -2.88412 | -3.90877 |
| H | 0.93863  | -2.32553 | -4.98805 |
| H | 4.12069  | 0.56075  | -2.62461 |
| H | 4.37713  | -1.12925 | -3.05640 |
| H | 4.47344  | 0.11795  | -4.30902 |
| H | 0.22340  | -1.22480 | -2.28832 |
| H | 1.78439  | -1.49534 | -1.51174 |
| H | 3.71395  | 3.44009  | -4.25486 |
| H | 3.63784  | 2.65709  | -2.64461 |
| H | 5.33990  | 4.79118  | -3.07260 |
| H | 4.49588  | 4.55834  | -1.52904 |
| H | 3.71591  | 6.79033  | -2.18542 |
| H | 3.57581  | 6.29995  | -3.88273 |
| H | 1.84623  | 5.40368  | -1.52330 |
| H | 1.28764  | 5.90742  | -3.13701 |

163

CS insertion into the P-P bond product

|    |          |          |          |
|----|----------|----------|----------|
| C  | 2.66909  | -3.26906 | 5.91683  |
| N  | 1.73457  | -4.15728 | 5.54444  |
| N  | 2.10574  | -5.37702 | 6.02890  |
| C  | 3.26725  | -5.25779 | 6.71585  |
| C  | 3.65291  | -3.92360 | 6.66669  |
| Y  | -0.43324 | -3.92981 | 4.53247  |
| N  | -1.16085 | -2.18800 | 5.74546  |
| Si | -1.13465 | -2.15385 | 7.51731  |
| C  | -2.85586 | -1.81707 | 8.26275  |
| B  | 1.37115  | -6.67701 | 5.59836  |
| N  | -0.08718 | -6.75592 | 6.14003  |
| N  | -1.06184 | -5.90524 | 5.71061  |
| C  | -2.22714 | -6.32173 | 6.23015  |
| C  | -2.00077 | -7.45780 | 7.01307  |
| C  | -0.63493 | -7.70674 | 6.93263  |
| C  | -3.50999 | -5.61334 | 5.93883  |
| C  | 0.14172  | -8.80507 | 7.58063  |
| C  | 3.96390  | -6.39760 | 7.38276  |
| C  | 2.59618  | -1.83741 | 5.49704  |
| N  | 0.75647  | -5.80927 | 3.29028  |
| C  | 0.93141  | -6.17776 | 2.01142  |
| C  | 1.65029  | -7.37991 | 1.95954  |
| C  | 1.90465  | -7.72565 | 3.27668  |
| N  | 1.35802  | -6.76428 | 4.06048  |
| C  | 0.41409  | -5.38756 | 0.85613  |
| C  | 2.63759  | -8.91745 | 3.79875  |
| S  | -2.52504 | -3.92722 | 2.64812  |
| C  | -1.91481 | -2.73462 | 1.54491  |
| P  | -0.43572 | -1.96741 | 2.37975  |
| C  | -1.15097 | -0.51060 | 3.21241  |
| Si | -1.96874 | -0.84328 | 4.93044  |
| C  | -1.76703 | 0.85204  | 5.77478  |
| S  | -2.51958 | -2.32809 | 0.07544  |
| Y  | 0.15549  | 2.62749  | -3.12859 |

---

|    |          |          |          |
|----|----------|----------|----------|
| N  | 0.90447  | 0.91415  | -4.38249 |
| Si | 1.28655  | -0.65356 | -3.63103 |
| C  | 0.12434  | -0.97086 | -2.14651 |
| P  | 0.01071  | 0.56762  | -1.15152 |
| C  | 0.67512  | 0.36656  | 0.44419  |
| S  | 1.04233  | 1.64902  | 1.47909  |
| N  | 0.84241  | 4.68036  | -4.23754 |
| C  | 2.03365  | 5.14035  | -4.65470 |
| C  | 1.85591  | 6.36040  | -5.31436 |
| C  | 0.49006  | 6.61217  | -5.28002 |
| N  | -0.09883 | 5.58340  | -4.62679 |
| C  | 3.30760  | 4.39058  | -4.43667 |
| C  | -0.24832 | 7.77872  | -5.84850 |
| B  | -1.60061 | 5.40048  | -4.29072 |
| N  | -1.83187 | 5.34195  | -2.76491 |
| N  | -1.43929 | 4.26446  | -2.01556 |
| C  | -2.02148 | 4.39579  | -0.81196 |
| C  | -2.76973 | 5.58100  | -0.77716 |
| C  | -2.63508 | 6.15243  | -2.03135 |
| C  | -3.24208 | 7.41812  | -2.54130 |
| C  | -1.91223 | 3.37392  | 0.26771  |
| N  | -1.82910 | 2.87435  | -4.49073 |
| N  | -2.18924 | 4.11555  | -4.92967 |
| C  | -3.25793 | 4.01527  | -5.75810 |
| C  | -3.59844 | 2.67301  | -5.84627 |
| C  | -2.68778 | 1.99326  | -5.02801 |
| C  | -2.64661 | 0.54075  | -4.68703 |
| C  | -3.91087 | 5.18105  | -6.42402 |
| O  | 1.88583  | 3.49577  | -1.67986 |
| C  | 3.05190  | 2.76976  | -1.19273 |
| C  | 3.73188  | 3.69085  | -0.17826 |
| C  | 3.14966  | 5.07318  | -0.49096 |
| C  | 1.73816  | 4.72881  | -0.93120 |
| S  | 1.06559  | -1.33114 | 1.01660  |
| C  | -3.82913 | -1.11057 | 4.69372  |
| Si | 1.16369  | 1.00819  | -6.13774 |
| C  | 2.93844  | 0.49840  | -6.61183 |
| C  | 0.94174  | 2.75372  | -6.86133 |
| C  | -0.05139 | -0.02678 | -7.17824 |
| C  | 1.05037  | -2.18905 | -4.73410 |
| C  | 3.07487  | -0.71837 | -2.99483 |
| C  | -0.57438 | -3.80905 | 8.26586  |
| C  | 0.06816  | -0.86919 | 8.24290  |
| H  | 1.97505  | -7.60855 | 6.04419  |
| H  | -0.52820 | -9.40665 | 8.19891  |
| H  | 0.93787  | -8.41625 | 8.22243  |
| H  | 0.60729  | -9.46578 | 6.84305  |
| H  | -2.73077 | -8.02924 | 7.56806  |
| H  | -4.25343 | -5.83696 | 6.70781  |
| H  | -3.92247 | -5.92158 | 4.97183  |
| H  | -3.37173 | -4.52743 | 5.90734  |
| H  | 3.51412  | -8.63391 | 4.38976  |
| H  | 2.98062  | -9.52688 | 2.95954  |
| H  | 2.00265  | -9.54489 | 4.43237  |
| H  | 1.94649  | -7.92604 | 1.07538  |
| H  | -0.67376 | -5.28364 | 0.89742  |
| H  | 0.67647  | -5.88442 | -0.08095 |
| H  | 0.84212  | -4.38006 | 0.82838  |
| H  | 3.31538  | -6.90665 | 8.10191  |
| H  | 4.83797  | -6.02377 | 7.92058  |
| H  | 4.30493  | -7.14556 | 6.66021  |

---

|   |          |          |          |
|---|----------|----------|----------|
| H | 4.53565  | -3.48849 | 7.11275  |
| H | 2.94207  | -1.71229 | 4.46477  |
| H | 3.22620  | -1.21560 | 6.13763  |
| H | 1.56967  | -1.46179 | 5.55502  |
| H | -1.28851 | -4.61892 | 8.09510  |
| H | -0.48839 | -3.66516 | 9.34981  |
| H | 0.40602  | -4.12930 | 7.90051  |
| H | -0.15621 | 0.15243  | 7.92775  |
| H | 1.10057  | -1.09399 | 7.95731  |
| H | 0.01431  | -0.90219 | 9.33775  |
| H | -3.25220 | -0.83154 | 7.99926  |
| H | -2.80249 | -1.86830 | 9.35667  |
| H | -3.57988 | -2.56795 | 7.92885  |
| H | -2.22527 | 0.89980  | 6.76705  |
| H | -2.25667 | 1.60846  | 5.15000  |
| H | -0.71326 | 1.13263  | 5.86693  |
| H | -4.03308 | -2.02262 | 4.12643  |
| H | -4.26807 | -0.26548 | 4.15111  |
| H | -4.33128 | -1.18555 | 5.66393  |
| H | -0.30743 | 0.16806  | 3.39415  |
| H | -1.83684 | 0.00971  | 2.53440  |
| H | -2.18693 | 6.34370  | -4.73479 |
| H | 0.45953  | 8.45222  | -6.33676 |
| H | -0.98829 | 7.46801  | -6.59194 |
| H | -0.77725 | 8.34428  | -5.07556 |
| H | 2.61624  | 6.97576  | -5.77375 |
| H | 3.99036  | 4.55757  | -5.27437 |
| H | 3.81707  | 4.71692  | -3.52462 |
| H | 3.13208  | 3.31417  | -4.35747 |
| H | -3.95601 | 7.23407  | -3.35036 |
| H | -3.77621 | 7.91542  | -1.72851 |
| H | -2.48589 | 8.11140  | -2.92232 |
| H | -3.34709 | 5.96273  | 0.05273  |
| H | -0.87743 | 3.14255  | 0.54524  |
| H | -2.42888 | 3.72648  | 1.16382  |
| H | -2.37272 | 2.42982  | -0.04160 |
| H | -3.19449 | 5.77628  | -6.99783 |
| H | -4.67988 | 4.82191  | -7.11156 |
| H | -4.39039 | 5.84876  | -5.70124 |
| H | -4.40672 | 2.24581  | -6.42219 |
| H | -3.17975 | 0.34743  | -3.74883 |
| H | -3.12541 | -0.05345 | -5.46906 |
| H | -1.61426 | 0.19871  | -4.57296 |
| H | 1.75047  | 3.44196  | -6.60762 |
| H | 0.93909  | 2.63910  | -7.95232 |
| H | -0.00751 | 3.21854  | -6.57969 |
| H | 0.25622  | 0.02788  | -8.22959 |
| H | -0.10075 | -1.08076 | -6.89997 |
| H | -1.05983 | 0.39412  | -7.11236 |
| H | 3.16547  | -0.54385 | -6.36969 |
| H | 3.08997  | 0.62955  | -7.68966 |
| H | 3.66998  | 1.12745  | -6.09277 |
| H | 1.65415  | -2.18746 | -5.64567 |
| H | 1.34604  | -3.06436 | -4.14350 |
| H | 0.00185  | -2.32569 | -5.01573 |
| H | 3.24240  | 0.01650  | -2.20275 |
| H | 3.29889  | -1.70875 | -2.58298 |
| H | 3.78574  | -0.51800 | -3.80309 |
| H | -0.87747 | -1.25697 | -2.48663 |
| H | 0.50247  | -1.79914 | -1.53837 |
| H | 3.67989  | 2.55802  | -2.06360 |

---

|   |         |         |          |
|---|---------|---------|----------|
| H | 2.70606 | 1.83725 | -0.74112 |
| H | 4.82149 | 3.65837 | -0.26304 |
| H | 3.45431 | 3.38171 | 0.83313  |
| H | 3.15618 | 5.74168 | 0.37423  |
| H | 3.69831 | 5.56330 | -1.30278 |
| H | 1.08617 | 4.53670 | -0.07288 |
| H | 1.27241 | 5.45830 | -1.59632 |

163

C-S activation TS

|    |          |          |          |
|----|----------|----------|----------|
| C  | 2.54504  | -4.18265 | 5.50502  |
| N  | 1.36935  | -4.55379 | 4.97799  |
| N  | 1.13927  | -5.84553 | 5.34344  |
| C  | 2.16309  | -6.28880 | 6.11183  |
| C  | 3.07745  | -5.24977 | 6.23875  |
| Y  | -0.34339 | -3.33018 | 3.80077  |
| N  | -0.50897 | -1.55513 | 5.17844  |
| Si | -0.64319 | -1.65492 | 6.93650  |
| C  | -2.18543 | -0.75977 | 7.61384  |
| B  | -0.02515 | -6.66376 | 4.71731  |
| N  | -1.42652 | -6.13608 | 5.13904  |
| N  | -1.90037 | -4.92782 | 4.72236  |
| C  | -3.17386 | -4.82810 | 5.13243  |
| C  | -3.52683 | -5.98857 | 5.82999  |
| C  | -2.39653 | -6.79703 | 5.81394  |
| C  | -4.00758 | -3.62649 | 4.82760  |
| C  | -2.22456 | -8.15302 | 6.41510  |
| C  | 2.23891  | -7.66434 | 6.68765  |
| C  | 3.12117  | -2.83080 | 5.23653  |
| N  | 0.08455  | -5.46287 | 2.48170  |
| C  | 0.25651  | -5.78053 | 1.18926  |
| C  | 0.38592  | -7.17123 | 1.05944  |
| C  | 0.28477  | -7.68294 | 2.34249  |
| N  | 0.10528  | -6.63480 | 3.18322  |
| C  | 0.29133  | -4.76633 | 0.09504  |
| C  | 0.35209  | -9.10864 | 2.78225  |
| S  | -2.16118 | -2.43654 | 1.82919  |
| C  | -1.01013 | -1.54134 | 0.91298  |
| P  | 0.61656  | -1.45374 | 1.86014  |
| C  | 0.34401  | 0.12098  | 2.79874  |
| Si | -0.67724 | 0.03501  | 4.42553  |
| C  | 0.05558  | 1.47860  | 5.43735  |
| S  | -1.30887 | -0.88711 | -0.58637 |
| Y  | 0.17064  | 2.93350  | -3.72473 |
| N  | 1.40640  | 1.50075  | -4.92520 |
| Si | 2.52260  | 0.36790  | -4.12107 |
| C  | 1.70679  | -0.27326 | -2.52077 |
| P  | 0.94824  | 1.08340  | -1.53851 |
| C  | 2.09601  | 1.70387  | -0.50250 |
| S  | 2.86247  | 2.48872  | 0.62443  |
| N  | -0.33108 | 4.87751  | -5.08639 |
| C  | 0.43212  | 5.70293  | -5.82340 |
| C  | -0.37701 | 6.67294  | -6.42214 |
| C  | -1.67362 | 6.38898  | -6.00964 |
| N  | -1.61897 | 5.30187  | -5.20553 |
| C  | 1.91243  | 5.53574  | -5.93915 |
| C  | -2.93252 | 7.11097  | -6.35994 |
| B  | -2.78668 | 4.60776  | -4.45248 |
| N  | -2.58916 | 4.70961  | -2.92450 |
| N  | -1.54676 | 4.09658  | -2.28663 |
| C  | -1.73624 | 4.28227  | -0.96897 |
| C  | -2.90164 | 5.02921  | -0.75927 |



---

|    |          |          |          |
|----|----------|----------|----------|
| C  | -3.42239 | 5.27875  | -2.01939 |
| C  | -4.66657 | 6.02465  | -2.37343 |
| C  | -0.82672 | 3.72155  | 0.07256  |
| N  | -1.97370 | 2.19734  | -4.50032 |
| N  | -2.91898 | 3.12013  | -4.85085 |
| C  | -4.00230 | 2.49135  | -5.36670 |
| C  | -3.75022 | 1.12724  | -5.34236 |
| C  | -2.47640 | 0.98190  | -4.78293 |
| C  | -1.75096 | -0.27892 | -4.45565 |
| C  | -5.22368 | 3.19716  | -5.85504 |
| O  | 1.59740  | 4.65587  | -2.74491 |
| C  | 3.03100  | 4.55117  | -2.50241 |
| C  | 3.38324  | 5.75022  | -1.63694 |
| C  | 2.37651  | 6.80083  | -2.10694 |
| C  | 1.12227  | 5.96912  | -2.32572 |
| S  | 2.29534  | -1.32890 | 0.73401  |
| C  | -2.48151 | 0.51373  | 4.07745  |
| Si | 1.33999  | 1.40993  | -6.70265 |
| C  | 3.03742  | 1.80013  | -7.47234 |
| C  | 0.10354  | 2.64162  | -7.46055 |
| C  | 0.75159  | -0.25860 | -7.40325 |
| C  | 2.96103  | -1.22455 | -5.06523 |
| C  | 4.18881  | 1.17075  | -3.69083 |
| C  | -0.79038 | -3.44528 | 7.55995  |
| C  | 0.86571  | -0.94645 | 7.85955  |
| H  | 0.06969  | -7.79327 | 5.10149  |
| H  | -3.14708 | -8.44326 | 6.92309  |
| H  | -1.41331 | -8.17286 | 7.14917  |
| H  | -2.00074 | -8.91074 | 5.65799  |
| H  | -4.47890 | -6.21558 | 6.28806  |
| H  | -4.85337 | -3.56567 | 5.51724  |
| H  | -4.40605 | -3.66860 | 3.80799  |
| H  | -3.42755 | -2.70254 | 4.91637  |
| H  | 1.18510  | -9.28886 | 3.46932  |
| H  | 0.49215  | -9.74984 | 1.90877  |
| H  | -0.56543 | -9.42543 | 3.28853  |
| H  | 0.53615  | -7.73016 | 0.14676  |
| H  | -0.68153 | -4.28051 | -0.02834 |
| H  | 0.54948  | -5.25281 | -0.84929 |
| H  | 1.03351  | -3.98199 | 0.28132  |
| H  | 1.36517  | -7.89656 | 7.30394  |
| H  | 3.12845  | -7.74645 | 7.31632  |
| H  | 2.30311  | -8.42964 | 5.90784  |
| H  | 4.00848  | -5.27085 | 6.78686  |
| H  | 3.62393  | -2.80495 | 4.26308  |
| H  | 3.85390  | -2.56306 | 6.00193  |
| H  | 2.33829  | -2.06557 | 5.22663  |
| H  | -1.72510 | -3.92604 | 7.25844  |
| H  | -0.76949 | -3.41793 | 8.65640  |
| H  | 0.04219  | -4.07368 | 7.23098  |
| H  | 1.03071  | 0.11319  | 7.64996  |
| H  | 1.77815  | -1.49040 | 7.59538  |
| H  | 0.71697  | -1.05582 | 8.94051  |
| H  | -2.16975 | 0.31815  | 7.42545  |
| H  | -2.25121 | -0.90387 | 8.69886  |
| H  | -3.10001 | -1.16464 | 7.16757  |
| H  | -0.45700 | 1.64414  | 6.38982  |
| H  | -0.04048 | 2.39884  | 4.84824  |
| H  | 1.12010  | 1.32656  | 5.64216  |
| H  | -2.96079 | -0.20598 | 3.40820  |
| H  | -2.52823 | 1.50178  | 3.60431  |

---

|   |          |          |          |
|---|----------|----------|----------|
| H | -3.05557 | 0.55916  | 5.00884  |
| H | 1.35870  | 0.41470  | 3.09527  |
| H | -0.02854 | 0.90383  | 2.12748  |
| H | -3.79767 | 5.17227  | -4.75018 |
| H | -2.69959 | 7.94209  | -7.02911 |
| H | -3.64838 | 6.45753  | -6.86709 |
| H | -3.42934 | 7.51753  | -5.47407 |
| H | -0.06790 | 7.47116  | -7.08169 |
| H | 2.24077  | 5.75058  | -6.95998 |
| H | 2.44776  | 6.22152  | -5.27377 |
| H | 2.22458  | 4.51615  | -5.69823 |
| H | -5.39827 | 5.38402  | -2.87520 |
| H | -5.12787 | 6.40981  | -1.46145 |
| H | -4.46414 | 6.87337  | -3.03396 |
| H | -3.32007 | 5.33456  | 0.18898  |
| H | 0.22775  | 3.89414  | -0.16022 |
| H | -1.03706 | 4.18178  | 1.04088  |
| H | -0.96590 | 2.64016  | 0.17664  |
| H | -4.98455 | 3.94429  | -6.61755 |
| H | -5.90957 | 2.47054  | -6.29561 |
| H | -5.75046 | 3.70923  | -5.04377 |
| H | -4.41091 | 0.33971  | -5.67459 |
| H | -1.98425 | -0.60697 | -3.43593 |
| H | -2.05039 | -1.08081 | -5.13529 |
| H | -0.66920 | -0.14241 | -4.53704 |
| H | 0.41560  | 3.68565  | -7.40453 |
| H | 0.01497  | 2.38316  | -8.52258 |
| H | -0.89536 | 2.55788  | -7.02142 |
| H | 0.62745  | -0.14830 | -8.48708 |
| H | 1.44713  | -1.08112 | -7.23229 |
| H | -0.22126 | -0.54141 | -6.98993 |
| H | 3.80243  | 1.07883  | -7.16855 |
| H | 2.97670  | 1.77754  | -8.56653 |
| H | 3.38510  | 2.79593  | -7.17703 |
| H | 3.48046  | -1.04855 | -6.01191 |
| H | 3.63851  | -1.79722 | -4.42077 |
| H | 2.08652  | -1.85137 | -5.25899 |
| H | 4.11045  | 1.86764  | -2.85327 |
| H | 4.90742  | 0.39615  | -3.40131 |
| H | 4.59743  | 1.70844  | -4.55286 |
| H | 0.87453  | -0.94640 | -2.75904 |
| H | 2.38545  | -0.83064 | -1.86741 |
| H | 3.54239  | 4.57786  | -3.47111 |
| H | 3.21658  | 3.59482  | -2.01353 |
| H | 4.42443  | 6.05603  | -1.76689 |
| H | 3.22799  | 5.50848  | -0.58048 |
| H | 2.21181  | 7.59821  | -1.37752 |
| H | 2.70768  | 7.26280  | -3.04349 |
| H | 0.55153  | 5.84298  | -1.40179 |
| H | 0.45775  | 6.34641  | -3.10412 |

163

C-S activation product

|    |          |          |         |
|----|----------|----------|---------|
| N  | 0.95540  | -4.53363 | 5.87112 |
| N  | 0.65886  | -3.47257 | 5.06776 |
| C  | 1.16938  | -2.37198 | 5.64123 |
| C  | 1.79372  | -2.72588 | 6.84228 |
| C  | 1.64188  | -4.10284 | 6.95638 |
| Y  | -0.83784 | -3.82215 | 3.22054 |
| N  | -2.32763 | -2.19716 | 3.65344 |
| Si | -3.07870 | -1.97346 | 5.24463 |
| C  | -2.56501 | -3.31956 | 6.48444 |

---

|    |          |          |          |
|----|----------|----------|----------|
| C  | 1.06946  | -1.03414 | 4.98437  |
| C  | 2.12483  | -4.99869 | 8.04855  |
| B  | 0.69655  | -5.99635 | 5.41209  |
| N  | -0.81976 | -6.33325 | 5.30663  |
| N  | -1.62220 | -5.75263 | 4.36974  |
| C  | -2.82336 | -6.34918 | 4.43298  |
| C  | -2.79826 | -7.32592 | 5.43293  |
| C  | -1.51384 | -7.29060 | 5.96497  |
| C  | -3.93777 | -5.96466 | 3.51568  |
| C  | -0.94658 | -8.12941 | 7.06194  |
| P  | -0.25341 | -2.14170 | 0.89206  |
| C  | -1.55486 | -0.86374 | 1.04016  |
| Si | -2.95653 | -1.21312 | 2.32610  |
| C  | -3.47898 | 0.55435  | 2.80476  |
| C  | -1.00295 | -3.38962 | -0.26816 |
| S  | -1.84787 | -4.54922 | 0.69770  |
| S  | -0.87063 | -3.35491 | -1.90498 |
| S  | 1.43988  | -1.22618 | 0.02341  |
| P  | 0.70934  | -0.21005 | -1.76232 |
| C  | 1.73552  | -0.78981 | -3.15687 |
| Si | 2.22471  | 0.61234  | -4.39302 |
| C  | 3.10542  | -0.34636 | -5.79120 |
| Y  | 0.44546  | 3.34219  | -3.26649 |
| N  | 0.40323  | 4.87043  | -5.24001 |
| C  | 1.22371  | 5.00831  | -6.29580 |
| C  | 0.62914  | 5.85087  | -7.24365 |
| C  | -0.59803 | 6.21511  | -6.70765 |
| N  | -0.70760 | 5.61405  | -5.49748 |
| C  | 2.55978  | 4.34402  | -6.36513 |
| C  | -1.64552 | 7.09142  | -7.31203 |
| B  | -1.85662 | 5.75799  | -4.47300 |
| N  | -1.33170 | 6.33914  | -3.14634 |
| N  | -0.49379 | 5.63149  | -2.33761 |
| C  | -0.32848 | 6.37129  | -1.22782 |
| C  | -1.05541 | 7.56608  | -1.33443 |
| C  | -1.68756 | 7.51084  | -2.56506 |
| C  | 0.49177  | 5.95403  | -0.05100 |
| C  | -2.59658 | 8.51975  | -3.18668 |
| O  | 2.51334  | 4.76333  | -2.80127 |
| C  | 2.60049  | 6.16106  | -3.19814 |
| C  | 3.98788  | 6.61332  | -2.77463 |
| C  | 4.19185  | 5.81757  | -1.48560 |
| C  | 3.57457  | 4.47406  | -1.84835 |
| N  | -1.96539 | 3.36860  | -3.56992 |
| N  | -2.57948 | 4.41960  | -4.18653 |
| C  | -3.89834 | 4.15703  | -4.34241 |
| C  | -4.14269 | 2.89961  | -3.80886 |
| C  | -2.90975 | 2.44208  | -3.33382 |
| C  | -4.87438 | 5.08955  | -4.98052 |
| C  | -2.61732 | 1.14411  | -2.66140 |
| N  | 0.96004  | 1.71509  | -4.87082 |
| Si | 0.05976  | 1.27140  | -6.32412 |
| C  | -1.49631 | 2.30631  | -6.65850 |
| C  | -0.57775 | -0.52727 | -6.23803 |
| C  | 1.04866  | 1.45751  | -7.94815 |
| C  | 0.82622  | 1.49220  | -1.70480 |
| S  | 0.55884  | 2.65114  | -0.53666 |
| C  | 3.67205  | 1.48255  | -3.50881 |
| N  | 1.05326  | -5.49213 | 2.94543  |
| C  | 1.83439  | -5.93170 | 1.94539  |
| C  | 2.66620  | -6.95850 | 2.41211  |

---

|   |          |          |          |
|---|----------|----------|----------|
| C | 2.35071  | -7.12315 | 3.75078  |
| N | 1.37820  | -6.22770 | 4.05086  |
| C | 1.78051  | -5.38305 | 0.55833  |
| C | 2.93612  | -8.08714 | 4.72964  |
| C | -4.44059 | -1.98050 | 1.43352  |
| C | -2.60422 | -0.33631 | 6.09185  |
| C | -4.98121 | -2.04904 | 5.17106  |
| H | 1.17651  | -6.72982 | 6.22611  |
| H | -1.72636 | -8.78280 | 7.45928  |
| H | -0.56447 | -7.51790 | 7.88455  |
| H | -0.12363 | -8.75897 | 6.70997  |
| H | -3.60534 | -7.97803 | 5.73432  |
| H | -4.90404 | -6.21245 | 3.96202  |
| H | -3.86343 | -6.49488 | 2.55983  |
| H | -3.92871 | -4.89147 | 3.29946  |
| H | 3.40259  | -7.57851 | 5.57913  |
| H | 3.70340  | -8.68479 | 4.23238  |
| H | 2.18291  | -8.77321 | 5.13006  |
| H | 3.40313  | -7.50939 | 1.84547  |
| H | 0.83087  | -5.61997 | 0.06962  |
| H | 2.58720  | -5.81242 | -0.04060 |
| H | 1.89950  | -4.29518 | 0.54043  |
| H | 1.30575  | -5.56553 | 8.50100  |
| H | 2.59267  | -4.39727 | 8.83105  |
| H | 2.86461  | -5.71995 | 7.68775  |
| H | 2.29647  | -2.07085 | 7.53918  |
| H | 1.87171  | -0.89633 | 4.25046  |
| H | 1.15460  | -0.23351 | 5.72322  |
| H | 0.11220  | -0.92049 | 4.46543  |
| H | -2.93551 | -4.31294 | 6.21790  |
| H | -3.00187 | -3.05238 | 7.45444  |
| H | -1.48120 | -3.37826 | 6.62057  |
| H | -2.89651 | 0.54399  | 5.51506  |
| H | -1.52555 | -0.28316 | 6.26910  |
| H | -3.10183 | -0.27819 | 7.06723  |
| H | -5.41741 | -1.24699 | 4.56793  |
| H | -5.39234 | -1.95986 | 6.18341  |
| H | -5.32244 | -3.00345 | 4.75627  |
| H | -4.33223 | 0.57813  | 3.48906  |
| H | -3.77641 | 1.08669  | 1.89335  |
| H | -2.65611 | 1.11308  | 3.26115  |
| H | -4.19748 | -2.95642 | 1.00583  |
| H | -4.76929 | -1.32423 | 0.61944  |
| H | -5.28080 | -2.10298 | 2.12487  |
| H | -1.03235 | 0.03033  | 1.40345  |
| H | -1.96531 | -0.62748 | 0.05152  |
| H | -2.65853 | 6.51777  | -4.93250 |
| H | -1.30238 | 7.44372  | -8.28752 |
| H | -2.58823 | 6.55577  | -7.45991 |
| H | -1.85978 | 7.96658  | -6.69118 |
| H | 1.03348  | 6.14903  | -8.20058 |
| H | 2.91149  | 4.30962  | -7.39919 |
| H | 3.31439  | 4.88172  | -5.77878 |
| H | 2.48676  | 3.32211  | -5.98166 |
| H | -3.59845 | 8.11620  | -3.36334 |
| H | -2.69301 | 9.37905  | -2.51880 |
| H | -2.21518 | 8.88027  | -4.14714 |
| H | -1.11824 | 8.36155  | -0.60521 |
| H | 1.36872  | 5.37841  | -0.34649 |
| H | 0.81903  | 6.83744  | 0.50547  |
| H | -0.08820 | 5.32690  | 0.63476  |

---

|   |          |          |          |
|---|----------|----------|----------|
| H | -4.57932 | 5.35411  | -6.00013 |
| H | -5.85418 | 4.60869  | -5.02643 |
| H | -4.98107 | 6.02079  | -4.41564 |
| H | -5.09023 | 2.38164  | -3.77273 |
| H | -2.26957 | 1.29864  | -1.63506 |
| H | -3.51871 | 0.52781  | -2.62803 |
| H | -1.84057 | 0.57984  | -3.18445 |
| H | -1.27638 | 3.37294  | -6.74902 |
| H | -1.90312 | 1.96908  | -7.62025 |
| H | -2.27546 | 2.17173  | -5.90470 |
| H | -1.14058 | -0.77033 | -7.14709 |
| H | 0.21746  | -1.27180 | -6.13540 |
| H | -1.25644 | -0.65106 | -5.38686 |
| H | 2.02949  | 0.97738  | -7.93147 |
| H | 0.47402  | 1.01601  | -8.77138 |
| H | 1.19263  | 2.51704  | -8.18406 |
| H | 3.67084  | 0.33641  | -6.43448 |
| H | 3.82508  | -1.03734 | -5.33585 |
| H | 2.43897  | -0.93522 | -6.42599 |
| H | 3.41889  | 1.77067  | -2.48477 |
| H | 4.52190  | 0.79219  | -3.45283 |
| H | 4.00092  | 2.37059  | -4.05915 |
| H | 1.18991  | -1.60482 | -3.64157 |
| H | 2.67351  | -1.20743 | -2.77250 |
| H | 4.30366  | 3.82461  | -2.33979 |
| H | 3.13386  | 3.93764  | -1.00373 |
| H | 5.24089  | 5.71671  | -1.19465 |
| H | 3.65177  | 6.28790  | -0.65710 |
| H | 4.03973  | 7.69598  | -2.63114 |
| H | 4.73672  | 6.33059  | -3.52346 |
| H | 1.81559  | 6.71492  | -2.67485 |
| H | 2.41201  | 6.21878  | -4.26930 |

163

C-S activation product rotamer

|    |          |          |          |
|----|----------|----------|----------|
| C  | -1.67439 | -6.45395 | 3.18568  |
| O  | -1.81061 | -5.00970 | 3.18413  |
| C  | -1.37260 | -4.47644 | 4.45906  |
| C  | -1.20430 | -5.67977 | 5.37592  |
| C  | -0.79544 | -6.77170 | 4.38586  |
| Y  | -2.74608 | -3.57083 | 1.35150  |
| N  | -3.56572 | -1.89019 | 2.70001  |
| Si | -5.29419 | -1.57205 | 2.93965  |
| C  | -5.84944 | 0.18276  | 2.42830  |
| N  | -4.07014 | -3.41615 | -0.69231 |
| C  | -4.45677 | -2.35164 | -1.41119 |
| C  | -5.20626 | -2.78054 | -2.51384 |
| C  | -5.24218 | -4.16462 | -2.42841 |
| N  | -4.54934 | -4.52481 | -1.32032 |
| C  | -4.07526 | -0.95893 | -1.03561 |
| B  | -4.22352 | -5.95298 | -0.82614 |
| N  | -2.69976 | -6.21132 | -0.84018 |
| N  | -1.85094 | -5.55280 | -0.00373 |
| C  | -0.61668 | -6.01254 | -0.25874 |
| C  | -0.67254 | -6.98183 | -1.27086 |
| C  | -2.00988 | -7.07993 | -1.62102 |
| C  | -5.91254 | -5.12857 | -3.35123 |
| C  | -2.63384 | -7.95703 | -2.65646 |
| C  | 0.59822  | -5.51579 | 0.45617  |
| P  | 0.42269  | -1.93501 | 2.68017  |
| S  | 2.15176  | -0.70633 | 2.25865  |
| N  | -4.42085 | -5.44858 | 1.66598  |

---

|    |          |          |          |
|----|----------|----------|----------|
| N  | -4.79574 | -6.19472 | 0.59111  |
| C  | -5.68452 | -7.14663 | 0.96751  |
| C  | -5.89086 | -7.00914 | 2.33176  |
| C  | -5.08311 | -5.93457 | 2.72729  |
| C  | -4.94839 | -5.35337 | 4.09570  |
| C  | -6.30105 | -8.13792 | 0.03617  |
| S  | -0.77144 | -2.29429 | -0.23161 |
| C  | -0.67575 | -2.32061 | 1.41184  |
| C  | 1.76838  | 1.57056  | 0.07206  |
| S  | 3.13002  | 0.95116  | -0.73167 |
| Y  | 3.08104  | 3.56118  | -1.60440 |
| N  | 2.21042  | 5.27507  | -3.05977 |
| N  | 2.92287  | 5.57751  | -4.18680 |
| C  | 2.35748  | 6.64333  | -4.80580 |
| C  | 1.25173  | 7.03020  | -4.06133 |
| C  | 1.18612  | 6.13850  | -2.98434 |
| B  | 3.96667  | 4.58787  | -4.79286 |
| N  | 5.23729  | 4.42220  | -3.91822 |
| N  | 5.18963  | 3.80494  | -2.70495 |
| C  | 6.45194  | 3.67142  | -2.26678 |
| C  | 7.32685  | 4.21657  | -3.21146 |
| C  | 6.52358  | 4.68447  | -4.24578 |
| C  | 6.75826  | 3.02104  | -0.95845 |
| C  | 6.94361  | 5.36017  | -5.50901 |
| C  | 2.87393  | 7.24809  | -6.06924 |
| C  | 0.13075  | 6.03856  | -1.93123 |
| C  | -0.71638 | -1.04598 | 3.84769  |
| Si | -2.50773 | -0.59103 | 3.26865  |
| C  | -2.28376 | 0.76930  | 1.96629  |
| C  | -3.10683 | 0.26504  | 4.87215  |
| P  | 1.52634  | 1.32985  | 1.91278  |
| C  | 3.14549  | 2.13697  | 2.30770  |
| Si | 3.55568  | 4.00690  | 2.00563  |
| C  | 5.24713  | 3.99886  | 2.89329  |
| S  | 0.64964  | 2.66936  | -0.58273 |
| N  | 3.64070  | 4.61575  | 0.33996  |
| Si | 4.02335  | 6.35666  | 0.24082  |
| C  | 2.47910  | 7.46821  | 0.35567  |
| N  | 2.70602  | 2.56282  | -3.94613 |
| C  | 2.10859  | 1.47744  | -4.46271 |
| C  | 2.32119  | 1.43514  | -5.84963 |
| C  | 3.07310  | 2.55692  | -6.15184 |
| N  | 3.28896  | 3.22249  | -4.98996 |
| C  | 1.33194  | 0.49282  | -3.65308 |
| C  | 3.58065  | 3.00727  | -7.48218 |
| C  | 5.22119  | 7.03462  | 1.56185  |
| C  | 4.88403  | 6.82370  | -1.38817 |
| C  | 2.29977  | 4.96274  | 3.06322  |
| C  | -6.41335 | -2.69548 | 1.88866  |
| C  | -5.87018 | -1.79557 | 4.74723  |
| H  | -4.74250 | -6.73012 | -1.57424 |
| H  | 4.30797  | 5.02271  | -5.85378 |
| H  | -6.41271 | -4.57514 | -4.14934 |
| H  | -6.66578 | -5.73231 | -2.83558 |
| H  | -5.20033 | -5.81856 | -3.81413 |
| H  | -5.66482 | -2.16579 | -3.27518 |
| H  | -3.93045 | -0.86080 | 0.04359  |
| H  | -4.85035 | -0.25208 | -1.34505 |
| H  | -3.13826 | -0.66416 | -1.52114 |
| H  | -1.86054 | -8.57012 | -3.12530 |
| H  | -3.12292 | -7.37391 | -3.44317 |

---

|   |          |          |          |
|---|----------|----------|----------|
| H | -3.38625 | -8.62769 | -2.23029 |
| H | 0.15190  | -7.53677 | -1.69584 |
| H | 1.13189  | -4.77034 | -0.14291 |
| H | 1.28989  | -6.34147 | 0.65138  |
| H | 0.34613  | -5.04181 | 1.40777  |
| H | -6.86252 | -7.64998 | -0.76619 |
| H | -6.99200 | -8.77555 | 0.59266  |
| H | -5.55048 | -8.78126 | -0.43342 |
| H | -6.54863 | -7.60214 | 2.95136  |
| H | -4.33661 | -4.44973 | 4.08493  |
| H | -4.49747 | -6.07184 | 4.78973  |
| H | -5.93056 | -5.08827 | 4.49908  |
| H | 6.66908  | 4.77873  | -6.39447 |
| H | 8.02851  | 5.48652  | -5.50946 |
| H | 6.48749  | 6.34947  | -5.61075 |
| H | 8.40473  | 4.26710  | -3.15548 |
| H | 6.06866  | 3.37365  | -0.18394 |
| H | 7.77832  | 3.25471  | -0.64432 |
| H | 6.66784  | 1.93101  | -1.02396 |
| H | 3.16508  | 3.97663  | -7.77565 |
| H | 3.29795  | 2.27657  | -8.24347 |
| H | 4.67129  | 3.10022  | -7.49354 |
| H | 1.96582  | 0.68512  | -6.54189 |
| H | 0.59041  | -0.00201 | -4.28668 |
| H | 0.80891  | 0.97825  | -2.82604 |
| H | 1.97832  | -0.28070 | -3.22693 |
| H | 2.31155  | 8.15771  | -6.29165 |
| H | 2.76702  | 6.56780  | -6.91993 |
| H | 3.93209  | 7.51315  | -5.99090 |
| H | 0.57806  | 7.84669  | -4.27829 |
| H | -0.68274 | 5.38628  | -2.26895 |
| H | -0.29744 | 7.02140  | -1.71862 |
| H | 0.51563  | 5.62963  | -0.99377 |
| H | -1.25388 | -6.75399 | 2.22591  |
| H | -2.67197 | -6.89497 | 3.28109  |
| H | 0.26412  | -6.67308 | 4.12548  |
| H | -0.96262 | -7.78484 | 4.76144  |
| H | -2.15202 | -5.93698 | 5.86157  |
| H | -0.46026 | -5.49880 | 6.15620  |
| H | -2.12110 | -3.75435 | 4.79475  |
| H | -0.42082 | -3.95842 | 4.29581  |
| H | -6.19620 | -2.61590 | 0.81954  |
| H | -7.44498 | -2.35573 | 2.04313  |
| H | -6.36778 | -3.75145 | 2.16159  |
| H | -5.45162 | -2.69668 | 5.20421  |
| H | -6.96305 | -1.87962 | 4.77885  |
| H | -5.58546 | -0.94472 | 5.37141  |
| H | -5.33789 | 0.98516  | 2.96621  |
| H | -6.92270 | 0.28299  | 2.63104  |
| H | -5.70049 | 0.34823  | 1.35649  |
| H | -4.06567 | 0.77881  | 4.76371  |
| H | -2.36486 | 1.01823  | 5.16260  |
| H | -3.19880 | -0.44760 | 5.69877  |
| H | -1.83223 | 0.38447  | 1.04745  |
| H | -1.63442 | 1.56662  | 2.34203  |
| H | -3.25037 | 1.21109  | 1.70515  |
| H | -0.25147 | -0.07448 | 4.05732  |
| H | -0.73015 | -1.59208 | 4.79749  |
| H | 3.94967  | 1.53704  | 1.86310  |
| H | 3.24862  | 2.05846  | 3.39848  |
| H | 5.97517  | 3.41306  | 2.32122  |

---

|   |         |         |          |
|---|---------|---------|----------|
| H | 5.13885 | 3.51897 | 3.87255  |
| H | 5.66766 | 4.99118 | 3.05543  |
| H | 2.54630 | 6.02576 | 3.14292  |
| H | 2.26646 | 4.55047 | 4.07791  |
| H | 1.29641 | 4.87877 | 2.63264  |
| H | 5.39243 | 8.09105 | 1.32147  |
| H | 6.19188 | 6.53041 | 1.54108  |
| H | 4.83015 | 6.99371 | 2.58236  |
| H | 5.84698 | 6.31723 | -1.50428 |
| H | 5.07404 | 7.90364 | -1.35245 |
| H | 4.28264 | 6.63164 | -2.27954 |
| H | 1.96810 | 7.52628 | -0.60899 |
| H | 2.77768 | 8.48714 | 0.62850  |
| H | 1.76266 | 7.11486 | 1.10245  |

163

C - C coupling TS

|    |          |          |          |
|----|----------|----------|----------|
| C  | -0.72111 | -5.76318 | 2.30429  |
| O  | -1.19850 | -4.48970 | 2.82379  |
| C  | -0.86536 | -4.38964 | 4.23495  |
| C  | -0.39237 | -5.77454 | 4.64989  |
| C  | 0.24238  | -6.28726 | 3.35631  |
| Y  | -2.54603 | -2.82678 | 1.53327  |
| N  | -3.63330 | -1.89375 | 3.28434  |
| Si | -5.37125 | -2.09562 | 3.61065  |
| C  | -6.33214 | -0.45479 | 3.75560  |
| N  | -3.98650 | -2.35929 | -0.38186 |
| C  | -4.70771 | -1.27326 | -0.70988 |
| C  | -5.32448 | -1.48026 | -1.94960 |
| C  | -4.93009 | -2.74371 | -2.36197 |
| N  | -4.12371 | -3.25434 | -1.40021 |
| C  | -4.77726 | -0.05510 | 0.14950  |
| B  | -3.38550 | -4.60792 | -1.40191 |
| N  | -1.85302 | -4.41389 | -1.40289 |
| N  | -1.19436 | -3.85952 | -0.34544 |
| C  | 0.11544  | -3.87708 | -0.64639 |
| C  | 0.29918  | -4.45253 | -1.91097 |
| C  | -0.96967 | -4.77770 | -2.36515 |
| C  | -5.29463 | -3.46038 | -3.62002 |
| C  | -1.35236 | -5.40770 | -3.66418 |
| C  | 1.16337  | -3.34409 | 0.27241  |
| P  | 0.20597  | -1.21505 | 3.17078  |
| S  | 1.93959  | -0.04320 | 3.71509  |
| N  | -3.66814 | -5.00392 | 1.09714  |
| N  | -3.81849 | -5.45230 | -0.17904 |
| C  | -4.37920 | -6.68467 | -0.17971 |
| C  | -4.59960 | -7.04478 | 1.14206  |
| C  | -4.14302 | -5.96545 | 1.90763  |
| C  | -4.16592 | -5.82986 | 3.39356  |
| C  | -4.68428 | -7.46690 | -1.41447 |
| S  | -1.40903 | -0.59307 | 0.44868  |
| C  | -0.37614 | -0.60128 | 1.70744  |
| C  | 1.46882  | 1.27214  | 0.88889  |
| S  | 2.90638  | 0.53476  | 0.27189  |
| Y  | 2.79860  | 2.82540  | -1.22964 |
| N  | 1.90381  | 4.13566  | -3.07324 |
| N  | 2.62812  | 4.22546  | -4.22804 |
| C  | 2.03220  | 5.10579  | -5.07008 |
| C  | 0.89192  | 5.58731  | -4.44267 |
| C  | 0.84122  | 4.94361  | -3.19972 |
| B  | 3.72194  | 3.17525  | -4.59457 |
| N  | 4.97767  | 3.24299  | -3.69025 |



---

|    |          |          |          |
|----|----------|----------|----------|
| N  | 4.92032  | 2.92765  | -2.36756 |
| C  | 6.17603  | 2.93407  | -1.89486 |
| C  | 7.05787  | 3.26096  | -2.93069 |
| C  | 6.26399  | 3.45135  | -4.05583 |
| C  | 6.46988  | 2.62984  | -0.46330 |
| C  | 6.69205  | 3.81981  | -5.43802 |
| C  | 2.55831  | 5.45622  | -6.42289 |
| C  | -0.22801 | 5.02513  | -2.15936 |
| C  | -0.97793 | -0.90516 | 4.56538  |
| Si | -2.86186 | -0.65053 | 4.28119  |
| C  | -3.04510 | 1.10340  | 3.58930  |
| C  | -3.45038 | -0.61327 | 6.09661  |
| P  | 1.30195  | 1.75084  | 2.67651  |
| C  | 2.92164  | 2.63214  | 2.81346  |
| Si | 3.27661  | 4.35679  | 2.02707  |
| C  | 4.97243  | 4.63395  | 2.86673  |
| S  | 0.36573  | 2.13256  | -0.10045 |
| N  | 3.32890  | 4.47866  | 0.26170  |
| Si | 3.65061  | 6.13478  | -0.31421 |
| C  | 2.06470  | 7.17036  | -0.53714 |
| N  | 2.54633  | 1.32693  | -3.33579 |
| C  | 1.98515  | 0.13984  | -3.60942 |
| C  | 2.18361  | -0.17920 | -4.96246 |
| C  | 2.89067  | 0.88219  | -5.50024 |
| N  | 3.09449  | 1.77598  | -4.50159 |
| C  | 1.26840  | -0.68408 | -2.59537 |
| C  | 3.36543  | 1.07267  | -6.90329 |
| C  | 4.77162  | 7.21319  | 0.79610  |
| C  | 4.55576  | 6.18607  | -1.98268 |
| C  | 2.00294  | 5.53421  | 2.80702  |
| C  | -6.27717 | -3.02162 | 2.22011  |
| C  | -5.72847 | -3.04268 | 5.23010  |
| H  | -3.68980 | -5.20315 | -2.39430 |
| H  | 4.06852  | 3.38578  | -5.72080 |
| H  | -5.96748 | -2.83403 | -4.20998 |
| H  | -5.80346 | -4.40808 | -3.41899 |
| H  | -4.41616 | -3.68215 | -4.23368 |
| H  | -5.97235 | -0.79730 | -2.48011 |
| H  | -4.49366 | -0.27270 | 1.18128  |
| H  | -5.79132 | 0.35597  | 0.14403  |
| H  | -4.10144 | 0.72350  | -0.22139 |
| H  | -0.45168 | -5.59538 | -4.25306 |
| H  | -2.01021 | -4.76076 | -4.25277 |
| H  | -1.87020 | -6.36163 | -3.52472 |
| H  | 1.23431  | -4.60512 | -2.43041 |
| H  | 1.32890  | -2.27162 | 0.12151  |
| H  | 2.11561  | -3.85186 | 0.09632  |
| H  | 0.89118  | -3.47459 | 1.32324  |
| H  | -5.39474 | -6.94478 | -2.06233 |
| H  | -5.12367 | -8.42729 | -1.13549 |
| H  | -3.78477 | -7.66420 | -2.00525 |
| H  | -5.04226 | -7.96385 | 1.49893  |
| H  | -3.78715 | -4.85744 | 3.71174  |
| H  | -3.56366 | -6.61078 | 3.87079  |
| H  | -5.18687 | -5.93010 | 3.77478  |
| H  | 6.44686  | 3.03842  | -6.16398 |
| H  | 7.77389  | 3.97026  | -5.45438 |
| H  | 6.21632  | 4.74473  | -5.77745 |
| H  | 8.13321  | 3.35103  | -2.87388 |
| H  | 5.79550  | 3.19380  | 0.18992  |
| H  | 7.49892  | 2.90253  | -0.21711 |

---

|   |          |          |          |
|---|----------|----------|----------|
| H | 6.34034  | 1.56421  | -0.24401 |
| H | 2.90248  | 1.94287  | -7.37998 |
| H | 3.11045  | 0.19049  | -7.49535 |
| H | 4.45018  | 1.21046  | -6.95337 |
| H | 1.84903  | -1.06699 | -5.48036 |
| H | 0.59994  | -1.39147 | -3.09329 |
| H | 0.67738  | -0.06478 | -1.91640 |
| H | 1.97346  | -1.25453 | -1.98339 |
| H | 1.96630  | 6.27372  | -6.84080 |
| H | 2.50322  | 4.61038  | -7.11541 |
| H | 3.60254  | 5.77912  | -6.38130 |
| H | 0.18941  | 6.30697  | -4.83793 |
| H | -0.96755 | 4.23021  | -2.30844 |
| H | -0.74910 | 5.98403  | -2.21842 |
| H | 0.17124  | 4.91867  | -1.14765 |
| H | -0.27266 | -5.57967 | 1.32862  |
| H | -1.58381 | -6.42443 | 2.17591  |
| H | 1.23818  | -5.85183 | 3.22007  |
| H | 0.33625  | -7.37584 | 3.31988  |
| H | -1.23753 | -6.40735 | 4.94210  |
| H | 0.30633  | -5.73094 | 5.48940  |
| H | -1.75267 | -4.03434 | 4.76502  |
| H | -0.06487 | -3.64910 | 4.33147  |
| H | -6.24891 | -2.46894 | 1.27700  |
| H | -7.32816 | -3.10954 | 2.52139  |
| H | -5.90173 | -4.02792 | 2.02587  |
| H | -5.05816 | -3.89301 | 5.38318  |
| H | -6.75585 | -3.42550 | 5.21080  |
| H | -5.63736 | -2.38958 | 6.10205  |
| H | -5.97727 | 0.19173  | 4.56237  |
| H | -7.38356 | -0.68848 | 3.96220  |
| H | -6.29805 | 0.11841  | 2.82414  |
| H | -4.48659 | -0.28354 | 6.21152  |
| H | -2.82164 | 0.09455  | 6.64947  |
| H | -3.35002 | -1.59305 | 6.57439  |
| H | -2.53606 | 1.21772  | 2.62857  |
| H | -2.60212 | 1.82614  | 4.28364  |
| H | -4.09809 | 1.36727  | 3.45485  |
| H | -0.65716 | 0.03985  | 5.02091  |
| H | -0.80693 | -1.68129 | 5.32004  |
| H | 3.71999  | 1.94074  | 2.51781  |
| H | 3.05809  | 2.84626  | 3.88236  |
| H | 5.69000  | 3.87943  | 2.52545  |
| H | 4.86159  | 4.51028  | 3.95045  |
| H | 5.40753  | 5.61665  | 2.68761  |
| H | 2.20715  | 6.58375  | 2.57498  |
| H | 2.00357  | 5.42642  | 3.89762  |
| H | 0.99625  | 5.29763  | 2.44675  |
| H | 4.87097  | 8.18293  | 0.29299  |
| H | 5.77697  | 6.79419  | 0.90118  |
| H | 4.36942  | 7.40514  | 1.79477  |
| H | 5.53487  | 5.70008  | -1.93080 |
| H | 4.71649  | 7.24095  | -2.23814 |
| H | 3.98934  | 5.73248  | -2.79814 |
| H | 1.56866  | 6.92977  | -1.48086 |
| H | 2.32294  | 8.23554  | -0.56471 |
| H | 1.35047  | 7.01672  | 0.27683  |

163

C - C coupling product

|   |          |          |         |
|---|----------|----------|---------|
| C | -0.70715 | -5.35911 | 3.02468 |
| O | -1.45529 | -4.13151 | 3.25806 |

---

|    |          |          |          |
|----|----------|----------|----------|
| C  | -1.36891 | -3.76521 | 4.66230  |
| C  | -0.79430 | -4.98553 | 5.36415  |
| C  | 0.12023  | -5.56638 | 4.28335  |
| Y  | -2.49462 | -2.68842 | 1.55652  |
| N  | -3.86141 | -1.69482 | 3.05018  |
| Si | -5.52571 | -2.24504 | 3.34480  |
| C  | -6.82094 | -0.85449 | 3.49587  |
| N  | -3.71409 | -2.35845 | -0.53283 |
| C  | -4.61169 | -1.44792 | -0.95351 |
| C  | -4.98750 | -1.73798 | -2.26967 |
| C  | -4.26783 | -2.86654 | -2.62997 |
| N  | -3.50573 | -3.22112 | -1.56814 |
| C  | -5.08247 | -0.31020 | -0.11153 |
| B  | -2.54010 | -4.41720 | -1.45831 |
| N  | -1.08492 | -3.98801 | -1.17290 |
| N  | -0.66643 | -3.57872 | 0.06678  |
| C  | 0.67741  | -3.52322 | 0.02210  |
| C  | 1.12336  | -3.87900 | -1.25674 |
| C  | -0.01597 | -4.16619 | -1.98853 |
| C  | -4.29537 | -3.60217 | -3.92911 |
| C  | -0.10928 | -4.59207 | -3.41657 |
| C  | 1.53199  | -3.15523 | 1.18682  |
| P  | -0.34462 | -0.79247 | 2.89538  |
| S  | 1.55434  | -0.27637 | 3.65155  |
| N  | -3.25807 | -4.99066 | 0.92371  |
| N  | -3.03466 | -5.39184 | -0.35982 |
| C  | -3.33584 | -6.70358 | -0.50120 |
| C  | -3.77677 | -7.16665 | 0.73026  |
| C  | -3.71849 | -6.06560 | 1.59073  |
| C  | -4.13166 | -6.01969 | 3.02422  |
| C  | -3.19326 | -7.46567 | -1.77718 |
| S  | -1.78819 | -0.01862 | 0.52085  |
| C  | -0.42252 | 0.29404  | 1.41066  |
| C  | 0.62521  | 1.32997  | 1.20996  |
| S  | 1.82349  | 0.37243  | 0.15361  |
| Y  | 2.29483  | 2.80836  | -1.10145 |
| N  | 1.80240  | 4.46611  | -2.80894 |
| N  | 2.42223  | 4.40196  | -4.02362 |
| C  | 2.04216  | 5.46070  | -4.78209 |
| C  | 1.15014  | 6.21867  | -4.03667 |
| C  | 1.01753  | 5.55240  | -2.81131 |
| B  | 3.11010  | 3.09498  | -4.52882 |
| N  | 4.36170  | 2.68074  | -3.72002 |
| N  | 4.26497  | 2.24443  | -2.43435 |
| C  | 5.47434  | 1.79425  | -2.07182 |
| C  | 6.36594  | 1.94074  | -3.14155 |
| C  | 5.62676  | 2.50921  | -4.17132 |
| C  | 5.73679  | 1.26726  | -0.69997 |
| C  | 6.08671  | 2.88908  | -5.54015 |
| C  | 2.53252  | 5.71336  | -6.16965 |
| C  | 0.11769  | 5.88467  | -1.66508 |
| C  | -1.51690 | 0.03976  | 4.05055  |
| Si | -3.41971 | -0.20289 | 3.89495  |
| C  | -4.09112 | 1.38886  | 3.11541  |
| C  | -3.93361 | -0.19319 | 5.73175  |
| P  | 1.29436  | 1.83418  | 2.91102  |
| C  | 3.05050  | 2.16613  | 2.56449  |
| Si | 3.66313  | 3.90515  | 1.98039  |
| C  | 5.41844  | 3.81347  | 2.73965  |
| S  | 0.07559  | 2.91508  | 0.49321  |
| N  | 3.60973  | 4.13797  | 0.23859  |

---

|    |          |          |          |
|----|----------|----------|----------|
| Si | 4.37259  | 5.63484  | -0.33963 |
| C  | 3.16953  | 7.11339  | -0.40741 |
| N  | 1.41837  | 1.68071  | -3.30956 |
| C  | 0.47867  | 0.77447  | -3.61313 |
| C  | 0.54096  | 0.46128  | -4.98053 |
| C  | 1.56356  | 1.23886  | -5.49685 |
| N  | 2.07053  | 1.96606  | -4.47191 |
| C  | -0.48244 | 0.24416  | -2.60833 |
| C  | 2.06388  | 1.31336  | -6.90212 |
| C  | 5.83072  | 6.30519  | 0.69947  |
| C  | 5.13938  | 5.46874  | -2.06654 |
| C  | 2.67647  | 5.20394  | 2.95113  |
| C  | -6.18319 | -3.29698 | 1.90278  |
| C  | -5.67619 | -3.24888 | 4.95831  |
| H  | -2.55746 | -4.99814 | -2.50324 |
| H  | 3.44793  | 3.27634  | -5.66314 |
| H  | -4.97426 | -3.09324 | -4.61695 |
| H  | -4.64643 | -4.63162 | -3.80757 |
| H  | -3.30792 | -3.64475 | -4.39775 |
| H  | -5.69044 | -1.19324 | -2.88336 |
| H  | -4.85135 | -0.47057 | 0.94314  |
| H  | -6.16408 | -0.18138 | -0.21795 |
| H  | -4.60746 | 0.62661  | -0.42255 |
| H  | 0.89156  | -4.60801 | -3.85350 |
| H  | -0.72045 | -3.90086 | -4.00468 |
| H  | -0.54388 | -5.59076 | -3.52428 |
| H  | 2.14552  | -3.91294 | -1.60489 |
| H  | 1.90416  | -2.12884 | 1.08972  |
| H  | 2.39979  | -3.82069 | 1.23995  |
| H  | 0.98400  | -3.22044 | 2.12806  |
| H  | -3.82908 | -7.05913 | -2.56931 |
| H  | -3.48270 | -8.50581 | -1.61140 |
| H  | -2.16261 | -7.45474 | -2.14430 |
| H  | -4.10371 | -8.16883 | 0.96821  |
| H  | -3.65202 | -5.19220 | 3.54856  |
| H  | -3.86654 | -6.95294 | 3.53036  |
| H  | -5.21502 | -5.89273 | 3.11915  |
| H  | 5.56485  | 2.32753  | -6.32123 |
| H  | 7.15596  | 2.68477  | -5.63263 |
| H  | 5.92787  | 3.95337  | -5.73908 |
| H  | 7.41260  | 1.67268  | -3.16613 |
| H  | 6.71799  | 0.78817  | -0.65503 |
| H  | 4.98128  | 0.53332  | -0.40064 |
| H  | 5.71254  | 2.08202  | 0.03126  |
| H  | 1.93709  | 2.31144  | -7.33380 |
| H  | 1.50901  | 0.60578  | -7.52303 |
| H  | 3.12690  | 1.06053  | -6.97117 |
| H  | -0.08742 | -0.23114 | -5.52292 |
| H  | -0.01982 | -0.51480 | -1.96981 |
| H  | -1.34755 | -0.19872 | -3.11025 |
| H  | -0.83537 | 1.03910  | -1.94774 |
| H  | 2.18936  | 6.69588  | -6.50216 |
| H  | 2.15790  | 4.96719  | -6.87772 |
| H  | 3.62475  | 5.69769  | -6.22332 |
| H  | 0.66167  | 7.13262  | -4.34307 |
| H  | -0.82827 | 5.33750  | -1.74589 |
| H  | -0.11140 | 6.95331  | -1.65446 |
| H  | 0.56722  | 5.62818  | -0.70217 |
| H  | -0.12673 | -5.22847 | 2.11105  |
| H  | -1.42491 | -6.17070 | 2.87202  |
| H  | 1.05696  | -5.00113 | 4.23035  |

---

|   |          |          |          |
|---|----------|----------|----------|
| H | 0.36532  | -6.61969 | 4.44275  |
| H | -1.58727 | -5.69687 | 5.62062  |
| H | -0.26578 | -4.71742 | 6.28246  |
| H | -2.36777 | -3.47132 | 4.99174  |
| H | -0.69782 | -2.90308 | 4.74568  |
| H | -6.43329 | -2.65364 | 1.05374  |
| H | -7.10816 | -3.79021 | 2.22508  |
| H | -5.50373 | -4.06797 | 1.53451  |
| H | -4.96235 | -4.07547 | 5.01172  |
| H | -6.68396 | -3.67127 | 5.04788  |
| H | -5.50760 | -2.60752 | 5.82846  |
| H | -6.64683 | -0.16973 | 4.32995  |
| H | -7.79958 | -1.32302 | 3.65717  |
| H | -6.89060 | -0.26241 | 2.57842  |
| H | -5.01665 | -0.18378 | 5.88232  |
| H | -3.52934 | 0.70662  | 6.21033  |
| H | -3.52738 | -1.06169 | 6.26192  |
| H | -3.68995 | 1.54907  | 2.11119  |
| H | -3.78395 | 2.24219  | 3.73119  |
| H | -5.18269 | 1.39366  | 3.05907  |
| H | -1.30053 | 1.11302  | 4.10954  |
| H | -1.23021 | -0.38477 | 5.02212  |
| H | 3.45866  | 1.37235  | 1.92669  |
| H | 3.53232  | 2.07761  | 3.54784  |
| H | 6.03115  | 3.06417  | 2.22589  |
| H | 5.33053  | 3.50247  | 3.78762  |
| H | 5.96208  | 4.75821  | 2.72406  |
| H | 3.10200  | 6.20455  | 2.82073  |
| H | 2.67363  | 4.97805  | 4.02350  |
| H | 1.63913  | 5.22280  | 2.60281  |
| H | 6.21098  | 7.18560  | 0.16691  |
| H | 6.65454  | 5.59125  | 0.78684  |
| H | 5.54451  | 6.63398  | 1.70286  |
| H | 5.89676  | 4.67888  | -2.09457 |
| H | 5.63083  | 6.41869  | -2.31009 |
| H | 4.40196  | 5.26576  | -2.84469 |
| H | 2.51933  | 7.06199  | -1.28385 |
| H | 3.74097  | 8.04680  | -0.47558 |
| H | 2.54112  | 7.16767  | 0.48704  |

163

Final C - S activation TS

|    |          |          |          |
|----|----------|----------|----------|
| C  | -3.66160 | 29.23954 | 1.42391  |
| N  | -2.81604 | 28.34829 | 1.97342  |
| N  | -2.79046 | 27.26583 | 1.14447  |
| C  | -3.61156 | 27.46622 | 0.08616  |
| C  | -4.18520 | 28.71859 | 0.23495  |
| Y  | -1.50668 | 28.33168 | 4.07344  |
| P  | 0.60025  | 30.23420 | 5.16965  |
| C  | -0.54849 | 31.21832 | 6.22858  |
| Si | -2.44066 | 31.13247 | 5.97219  |
| C  | -3.07232 | 31.50097 | 7.73449  |
| B  | -1.90869 | 26.03428 | 1.42408  |
| N  | -2.34859 | 25.34013 | 2.73665  |
| N  | -2.39922 | 25.99706 | 3.92902  |
| C  | -2.84747 | 25.11506 | 4.84018  |
| C  | -3.07488 | 23.87742 | 4.22781  |
| C  | -2.74887 | 24.05594 | 2.89154  |
| C  | -3.09119 | 25.47154 | 6.26879  |
| C  | -2.80589 | 23.05351 | 1.78624  |
| C  | -3.82852 | 26.47708 | -1.01117 |
| C  | -3.95811 | 30.56979 | 2.02848  |

---

|    |          |          |          |
|----|----------|----------|----------|
| S  | -0.64186 | 30.75065 | 2.55891  |
| C  | 0.58629  | 31.18053 | 3.57892  |
| C  | 1.72662  | 32.08841 | 3.28860  |
| P  | 1.96590  | 33.29071 | 4.66010  |
| S  | 1.07834  | 34.34934 | 2.97346  |
| Y  | 3.40628  | 34.46936 | 1.39898  |
| N  | 4.67921  | 35.70041 | 2.81279  |
| Si | 5.65419  | 37.13149 | 2.40600  |
| C  | 7.16732  | 37.42629 | 3.53250  |
| N  | 2.38295  | 33.67810 | -0.85877 |
| C  | 1.33057  | 32.94178 | -1.24350 |
| C  | 1.35090  | 32.77004 | -2.63664 |
| C  | 2.46707  | 33.45472 | -3.08222 |
| N  | 3.06929  | 33.99704 | -1.99480 |
| C  | 0.31656  | 32.41524 | -0.29240 |
| B  | 4.20817  | 35.02589 | -1.96251 |
| N  | 5.42738  | 34.43617 | -1.21241 |
| N  | 5.31412  | 33.91642 | 0.04166  |
| C  | 6.49763  | 33.36853 | 0.35948  |
| C  | 7.38561  | 33.53394 | -0.70835 |
| C  | 6.67478  | 34.21698 | -1.68845 |
| C  | 2.97101  | 33.60856 | -4.47943 |
| C  | 6.73586  | 32.72898 | 1.68732  |
| C  | 7.14691  | 34.65862 | -3.03416 |
| N  | 3.06195  | 36.32166 | -0.08551 |
| N  | 3.64475  | 36.33024 | -1.31883 |
| C  | 3.35682  | 37.49746 | -1.94594 |
| C  | 2.56330  | 38.25339 | -1.09311 |
| C  | 2.39239  | 37.47446 | 0.05785  |
| C  | 3.83867  | 37.84996 | -3.31435 |
| C  | 1.56605  | 37.75937 | 1.26958  |
| S  | 2.86787  | 31.65381 | 2.09014  |
| C  | 3.77385  | 33.55174 | 4.67201  |
| Si | 4.54927  | 35.29452 | 4.52045  |
| C  | 3.48972  | 36.51521 | 5.51410  |
| C  | 6.17738  | 35.02865 | 5.47550  |
| N  | 0.11278  | 27.16200 | 2.49310  |
| N  | -0.41593 | 26.40876 | 1.48175  |
| C  | 0.56584  | 25.98510 | 0.64904  |
| C  | 1.76647  | 26.47064 | 1.13930  |
| C  | 1.44288  | 27.19848 | 2.29129  |
| C  | 0.33798  | 25.15052 | -0.56838 |
| C  | 2.39257  | 27.92155 | 3.18216  |
| O  | -0.34459 | 27.06993 | 5.85464  |
| C  | -0.12320 | 27.57324 | 7.20206  |
| C  | 0.45042  | 26.39835 | 7.97620  |
| C  | 1.28421  | 25.70427 | 6.89718  |
| C  | 0.38882  | 25.82667 | 5.67278  |
| N  | -2.93705 | 29.55401 | 5.33176  |
| Si | -4.63627 | 29.14375 | 5.65606  |
| C  | -5.30885 | 27.82832 | 4.46074  |
| C  | -4.90740 | 28.50530 | 7.43304  |
| C  | -5.85380 | 30.59758 | 5.44718  |
| S  | 2.44528  | 30.29543 | 5.99730  |
| C  | -2.93348 | 32.62318 | 4.90421  |
| C  | 6.41143  | 37.04844 | 0.67090  |
| C  | 4.67933  | 38.76516 | 2.51173  |
| H  | -2.06363 | 25.25669 | 0.52861  |
| H  | 4.55114  | 35.28528 | -3.07932 |
| H  | -4.53435 | 26.89108 | -1.73485 |
| H  | -4.24197 | 25.53555 | -0.63669 |

---

|   |          |          |          |
|---|----------|----------|----------|
| H | -2.90050 | 26.24107 | -1.54050 |
| H | -4.89319 | 29.19238 | -0.42987 |
| H | -3.71691 | 30.58241 | 3.09277  |
| H | -5.01829 | 30.81078 | 1.90568  |
| H | -3.38348 | 31.36422 | 1.53934  |
| H | 1.29441  | 24.96835 | -1.06371 |
| H | -0.32217 | 25.64856 | -1.28526 |
| H | -0.10953 | 24.18095 | -0.32914 |
| H | 2.74982  | 26.32217 | 0.71673  |
| H | 2.56872  | 28.94471 | 2.83314  |
| H | 3.36169  | 27.41439 | 3.18932  |
| H | 2.04117  | 27.99326 | 4.21320  |
| H | -3.48765 | 23.36296 | 0.98853  |
| H | -3.15901 | 22.09862 | 2.18223  |
| H | -1.82320 | 22.88981 | 1.33362  |
| H | -3.43828 | 22.97173 | 4.69219  |
| H | -2.65963 | 26.44105 | 6.51701  |
| H | -2.65790 | 24.71970 | 6.93642  |
| H | -4.16449 | 25.51609 | 6.48055  |
| H | 6.57822  | 34.18910 | -3.84262 |
| H | 8.19776  | 34.38679 | -3.15642 |
| H | 7.06120  | 35.74240 | -3.15780 |
| H | 8.41330  | 33.20477 | -0.76380 |
| H | 7.76211  | 32.36066 | 1.75435  |
| H | 6.05892  | 31.88502 | 1.85671  |
| H | 6.57698  | 33.45394 | 2.49308  |
| H | 2.95260  | 34.65112 | -4.81290 |
| H | 2.34139  | 33.02777 | -5.15749 |
| H | 3.99969  | 33.24928 | -4.58363 |
| H | 0.64003  | 32.22134 | -3.23794 |
| H | 0.52235  | 31.37420 | -0.02887 |
| H | -0.68094 | 32.45655 | -0.74104 |
| H | 0.29696  | 32.98494 | 0.63905  |
| H | 3.58191  | 38.88895 | -3.53290 |
| H | 3.38000  | 37.21987 | -4.08297 |
| H | 4.92323  | 37.74088 | -3.40329 |
| H | 2.16236  | 39.23836 | -1.28452 |
| H | 0.56967  | 37.31323 | 1.17488  |
| H | 1.43900  | 38.83624 | 1.40487  |
| H | 2.02705  | 37.35729 | 2.17622  |
| H | 0.92747  | 25.88676 | 4.72601  |
| H | -0.33892 | 25.01102 | 5.61315  |
| H | 2.22393  | 26.24447 | 6.74291  |
| H | 1.51762  | 24.66184 | 7.13014  |
| H | -0.34523 | 25.73753 | 8.33863  |
| H | 1.04266  | 26.72868 | 8.83328  |
| H | -1.07993 | 27.94620 | 7.57714  |
| H | 0.60041  | 28.39430 | 7.14809  |
| H | -5.33336 | 28.20444 | 3.43375  |
| H | -6.33977 | 27.59919 | 4.75677  |
| H | -4.74677 | 26.89289 | 4.45362  |
| H | -4.16468 | 27.75862 | 7.72737  |
| H | -5.89903 | 28.04507 | 7.51853  |
| H | -4.85875 | 29.32310 | 8.15760  |
| H | -5.65977 | 31.43465 | 6.12311  |
| H | -6.86477 | 30.23096 | 5.66253  |
| H | -5.85490 | 30.98252 | 4.42294  |
| H | -4.15335 | 31.65420 | 7.79501  |
| H | -2.59121 | 32.42191 | 8.08494  |
| H | -2.80154 | 30.70012 | 8.43041  |
| H | -2.45978 | 32.60135 | 3.91916  |

---

|   |          |          |          |
|---|----------|----------|----------|
| H | -2.59971 | 33.53899 | 5.40590  |
| H | -4.01585 | 32.69308 | 4.76449  |
| H | -0.20153 | 32.25700 | 6.27789  |
| H | -0.35025 | 30.78435 | 7.21802  |
| H | 4.24816  | 32.86442 | 3.95786  |
| H | 4.05338  | 33.18232 | 5.66753  |
| H | 6.86616  | 34.37859 | 4.92585  |
| H | 5.93623  | 34.52908 | 6.42131  |
| H | 6.70458  | 35.95349 | 5.71535  |
| H | 3.96700  | 37.49948 | 5.56703  |
| H | 3.34411  | 36.16018 | 6.54064  |
| H | 2.50533  | 36.63990 | 5.05127  |
| H | 7.75621  | 38.22885 | 3.07195  |
| H | 7.81403  | 36.54863 | 3.62025  |
| H | 6.90143  | 37.76037 | 4.53971  |
| H | 7.06091  | 36.17511 | 0.55563  |
| H | 7.02542  | 37.94613 | 0.52913  |
| H | 5.66122  | 37.02769 | -0.12105 |
| H | 4.01456  | 38.89803 | 1.65463  |
| H | 5.38389  | 39.60528 | 2.51673  |
| H | 4.07979  | 38.82630 | 3.42526  |

163

Final product

|    |          |          |          |
|----|----------|----------|----------|
| C  | -3.40383 | -3.91597 | -1.93586 |
| N  | -2.83073 | -4.28335 | -0.77541 |
| N  | -2.37578 | -5.55972 | -0.94250 |
| C  | -2.66070 | -5.99433 | -2.19335 |
| C  | -3.31974 | -4.96954 | -2.85305 |
| Y  | -2.46854 | -3.08180 | 1.32375  |
| P  | -1.23286 | -0.28278 | 2.12980  |
| C  | -2.76684 | 0.70062  | 2.13894  |
| Si | -4.35753 | -0.08911 | 1.37216  |
| C  | -5.69269 | 0.76520  | 2.43621  |
| B  | -1.64024 | -6.33259 | 0.17041  |
| N  | -2.54853 | -6.48492 | 1.41419  |
| N  | -3.05735 | -5.40729 | 2.06976  |
| C  | -3.78163 | -5.88238 | 3.09718  |
| C  | -3.73353 | -7.28157 | 3.10248  |
| C  | -2.94153 | -7.63131 | 2.01824  |
| C  | -4.51928 | -4.99566 | 4.04440  |
| C  | -2.56391 | -8.99854 | 1.55145  |
| C  | -2.30741 | -7.34815 | -2.71516 |
| C  | -4.01041 | -2.57267 | -2.16011 |
| S  | -1.26344 | -1.34356 | -0.52967 |
| C  | -0.49415 | -0.15795 | 0.49083  |
| C  | 0.54359  | 0.67402  | 0.21265  |
| P  | 1.20125  | 1.67797  | 1.54604  |
| S  | 0.95058  | 3.65970  | 1.22543  |
| Y  | 2.37259  | 3.49031  | -1.24420 |
| N  | 4.36293  | 3.21625  | -0.18734 |
| Si | 5.92745  | 3.79592  | -0.79235 |
| C  | 7.00474  | 2.39975  | -1.51261 |
| N  | 0.37136  | 4.22096  | -2.61785 |
| C  | -0.93824 | 3.92978  | -2.60376 |
| C  | -1.57462 | 4.56810  | -3.67846 |
| C  | -0.57955 | 5.25813  | -4.35119 |
| N  | 0.58346  | 5.03466  | -3.69224 |
| C  | -1.55973 | 3.03286  | -1.58810 |
| B  | 1.98679  | 5.56433  | -4.02891 |
| N  | 2.92386  | 4.37386  | -4.38132 |
| N  | 3.08369  | 3.30975  | -3.54306 |



---

|    |          |          |          |
|----|----------|----------|----------|
| C  | 3.79637  | 2.38050  | -4.20035 |
| C  | 4.11517  | 2.85972  | -5.47565 |
| C  | 3.54417  | 4.12346  | -5.55857 |
| C  | -0.69927 | 6.10657  | -5.57433 |
| C  | 4.10504  | 1.04691  | -3.60342 |
| C  | 3.57700  | 5.07680  | -6.70726 |
| N  | 2.60351  | 5.89234  | -1.58026 |
| N  | 2.51820  | 6.40479  | -2.83992 |
| C  | 2.82218  | 7.72362  | -2.82225 |
| C  | 3.11093  | 8.07098  | -1.50867 |
| C  | 2.95884  | 6.89662  | -0.76300 |
| C  | 2.82606  | 8.59937  | -4.03169 |
| C  | 3.12944  | 6.70097  | 0.70666  |
| S  | 1.41975  | 0.88013  | -1.28534 |
| C  | 2.94791  | 1.22760  | 1.75988  |
| Si | 4.40615  | 2.45334  | 1.38979  |
| C  | 4.39344  | 3.66103  | 2.85690  |
| C  | 5.86473  | 1.25563  | 1.66473  |
| N  | -0.30167 | -4.38982 | 1.10678  |
| N  | -0.31999 | -5.63483 | 0.55384  |
| C  | 0.94359  | -6.09926 | 0.39802  |
| C  | 1.80647  | -5.12325 | 0.87239  |
| C  | 0.98790  | -4.06979 | 1.29864  |
| C  | 1.28513  | -7.42931 | -0.18879 |
| C  | 1.41650  | -2.75548 | 1.85794  |
| O  | -1.86290 | -3.23939 | 3.76517  |
| C  | -2.24492 | -2.28998 | 4.79211  |
| C  | -1.80624 | -2.90485 | 6.11438  |
| C  | -0.58673 | -3.72548 | 5.69131  |
| C  | -1.03611 | -4.28192 | 4.35035  |
| N  | -4.38950 | -1.85690 | 1.46624  |
| Si | -6.03352 | -2.52969 | 1.35830  |
| C  | -6.05758 | -4.34192 | 0.78704  |
| C  | -6.98972 | -2.44089 | 3.00867  |
| C  | -7.15972 | -1.66673 | 0.08080  |
| S  | 0.16963  | 0.96071  | 3.26088  |
| C  | -4.48424 | 0.62834  | -0.37548 |
| C  | 5.77749  | 5.07061  | -2.19035 |
| C  | 6.97143  | 4.67857  | 0.53996  |
| H  | -1.38286 | -7.42646 | -0.24005 |
| H  | 1.92345  | 6.27651  | -4.98871 |
| H  | -2.66493 | -7.44221 | -3.74307 |
| H  | -2.76325 | -8.14792 | -2.12357 |
| H  | -1.22616 | -7.51640 | -2.71786 |
| H  | -3.68915 | -4.98262 | -3.86836 |
| H  | -4.30658 | -2.10605 | -1.21882 |
| H  | -4.89070 | -2.66183 | -2.80375 |
| H  | -3.29913 | -1.89982 | -2.65007 |
| H  | 2.36881  | -7.56550 | -0.16805 |
| H  | 0.95638  | -7.51196 | -1.22947 |
| H  | 0.82902  | -8.25494 | 0.36593  |
| H  | 2.88606  | -5.16543 | 0.89477  |
| H  | 1.49913  | -2.00648 | 1.06354  |
| H  | 2.39197  | -2.84704 | 2.34347  |
| H  | 0.70049  | -2.37437 | 2.59236  |
| H  | -2.91003 | -9.18974 | 0.53135  |
| H  | -3.01819 | -9.74382 | 2.20836  |
| H  | -1.48045 | -9.15105 | 1.56431  |
| H  | -4.22030 | -7.95411 | 3.79445  |
| H  | -4.47356 | -3.95202 | 3.73080  |
| H  | -4.11029 | -5.06935 | 5.05843  |

---

|   |          |          |          |
|---|----------|----------|----------|
| H | -5.57413 | -5.28179 | 4.09842  |
| H | 2.57638  | 5.27489  | -7.10345 |
| H | 4.18217  | 4.65307  | -7.51192 |
| H | 4.01483  | 6.03876  | -6.42447 |
| H | 4.68195  | 2.35332  | -6.24375 |
| H | 4.99177  | 0.61430  | -4.07414 |
| H | 3.27091  | 0.35216  | -3.75080 |
| H | 4.28511  | 1.11428  | -2.52695 |
| H | -0.38948 | 7.14021  | -5.38980 |
| H | -1.74075 | 6.12106  | -5.90393 |
| H | -0.09053 | 5.72404  | -6.39986 |
| H | -2.62422 | 4.52878  | -3.93288 |
| H | -1.30681 | 1.98560  | -1.78364 |
| H | -2.64713 | 3.13619  | -1.61674 |
| H | -1.21058 | 3.26936  | -0.57901 |
| H | 3.15499  | 9.60258  | -3.75108 |
| H | 1.83046  | 8.68201  | -4.47863 |
| H | 3.50303  | 8.22482  | -4.80521 |
| H | 3.39310  | 9.04805  | -1.14337 |
| H | 2.16433  | 6.71478  | 1.22526  |
| H | 3.74658  | 7.49928  | 1.12702  |
| H | 3.60757  | 5.74164  | 0.92167  |
| H | -0.22807 | -4.49653 | 3.65114  |
| H | -1.64803 | -5.18269 | 4.46775  |
| H | 0.28756  | -3.07709 | 5.56826  |
| H | -0.32932 | -4.51703 | 6.40003  |
| H | -2.58642 | -3.55802 | 6.52068  |
| H | -1.57916 | -2.14167 | 6.86325  |
| H | -3.32109 | -2.11301 | 4.71571  |
| H | -1.71738 | -1.35038 | 4.59429  |
| H | -5.58326 | -4.46037 | -0.19143 |
| H | -7.10946 | -4.63580 | 0.68648  |
| H | -5.58048 | -5.04356 | 1.47259  |
| H | -6.38699 | -2.75537 | 3.86507  |
| H | -7.86968 | -3.09329 | 2.96037  |
| H | -7.34167 | -1.42483 | 3.20807  |
| H | -7.32165 | -0.60316 | 0.27395  |
| H | -8.14055 | -2.15670 | 0.10870  |
| H | -6.76910 | -1.77118 | -0.93606 |
| H | -6.70958 | 0.62177  | 2.06085  |
| H | -5.49703 | 1.84416  | 2.44485  |
| H | -5.66139 | 0.41145  | 3.47226  |
| H | -3.60959 | 0.34308  | -0.96626 |
| H | -4.51683 | 1.72231  | -0.31426 |
| H | -5.38558 | 0.29424  | -0.89554 |
| H | -2.61360 | 1.69269  | 1.69996  |
| H | -2.99677 | 0.84249  | 3.20349  |
| H | 3.08640  | 0.30968  | 1.17786  |
| H | 3.07671  | 0.97253  | 2.81894  |
| H | 5.86139  | 0.45057  | 0.92268  |
| H | 5.78176  | 0.79932  | 2.65820  |
| H | 6.83546  | 1.75677  | 1.61516  |
| H | 5.23855  | 4.35358  | 2.81016  |
| H | 4.46650  | 3.10724  | 3.80071  |
| H | 3.46851  | 4.24403  | 2.87895  |
| H | 7.99643  | 2.79265  | -1.76688 |
| H | 6.56073  | 2.00706  | -2.43213 |
| H | 7.14048  | 1.56535  | -0.82020 |
| H | 5.24898  | 4.68083  | -3.06374 |
| H | 6.79628  | 5.32638  | -2.50722 |
| H | 5.28529  | 5.99261  | -1.86963 |

|   |         |         |         |
|---|---------|---------|---------|
| H | 6.44303 | 5.55005 | 0.94082 |
| H | 7.89918 | 5.03867 | 0.07961 |
| H | 7.25194 | 4.03781 | 1.38108 |

## 6. References

1. W. Yi, J. Zhang, F. Zhang, Y. Zhang, Z. Chen, X. Zhou, *Versatile Reactivity of Scorpionate-Anchored Yttrium-Dialkyl Complexes towards Unsaturated Substrates*. *Chem. Eur. J.* 2013, **19**, 11975 – 11983.
2. V. R. Landaeta, M. Peruzzini, V. Herrera, C. Bianchini, R. A. Sánchez-Delgado, A. E. Goeta, F. Zanobini, *J. Organomet. Chem.* 2006, **691**, 1039-1050.
3. SAINTPlus Data Reduction and Correction Program v. 6.02 a; Bruker AXS: Madison, WI, 2000.
4. G. M. Sheldrick, *SADABS, A Program for Empirical Absorption Correction*; University of Göttingen: Göttingen, Germany, 1998.
5. G. M. Sheldrick, *SHELXL-97, Program for the Refinement of Crystal Structures*; University of Göttingen: Göttingen, Germany, 1997.
6. Gaussian 09, Revision D.01, M. J. Frisch, G. W. Trucks, H. B. Schlegel, G. E. Scuseria, M. A. Robb, J. R. Cheeseman, G. Scalmani, V. Barone, G. A. Petersson, H. Nakatsuji, X. Li, M. Caricato, A. Marenich, J. Bloino, B. G. Janesko, R. Gomperts, B. Mennucci, H. P. Hratchian, J. V. Ortiz, A. F. Izmaylov, J. L. Sonnenberg, D. Williams-Young, F. Ding, F. Lipparini, F. Egidi, J. Goings, B. Peng, A. Petrone, T. Henderson, D. Ranasinghe, V. G. Zakrzewski, J. Gao, N. Rega, G. Zheng, W. Liang, M. Hada, M. Ehara, K. Toyota, R. Fukuda, J. Hasegawa, M. Ishida, T. Nakajima, Y. Honda, O. Kitao, H. Nakai, T. Vreven, K. Throssell, J. A. Montgomery, Jr., J. E. Peralta, F. Ogliaro, M. Bearpark, J. J. Heyd, E. Brothers, K. N. Kudin, V. N. Staroverov, T. Keith, R. Kobayashi, J. Normand, K. Raghavachari, A. Rendell, J. C. Burant, S. S. Iyengar, J. Tomasi, M. Cossi, J. M. Millam, M. Klene, C. Adamo, R. Cammi, J. W. Ochterski, R. L. Martin, K. Morokuma, O. Farkas, J. B. Foresman, and D. J. Fox, Gaussian, Inc., Wallingford CT, 2016.
7. a) A. D. Becke, *Density-functional thermochemistry. III. The role of exact exchange*. *J. Chem. Phys.* 1993, **98**, 5648–5652; b) K. Burke, J. P. Perdew, W. Yang, *Electronic Density Functional Theory: Recent Progress and New Directions*, Plenum: New York, 1998.
8. a) D. Andrae, U. Haeussermann, M. Dolg, H. Stoll, H. Preuss, *Theor. Chim. Acta* 1990, **77**, 123 – 141; b) J. M. L. Martin, A. Sundermann, *Correlation consistent valence basis sets for use with the Stuttgart–Dresden–Bonn relativistic effective core potentials: The atoms Ga–Kr and In–Xe*. *J. Chem. Phys.* 2001, **114**, 3408 – 3420.
9. B. M. Dolg, W. Kuechle, H. Stoll, H. Preuss, *Ab initio energy-adjusted pseudopotentials for elements of groups 13–17*. *Mol. Phys.* 1993, **80**, 1431 – 1441.
10. a) P. C. Hariharan, J. A. Pople, *Theor. Chem. Acc.*, 1973, **28**, 213–222; b) W. J. Hehre, R. Ditchfield, J. A. Pople, *Self-Consistent Molecular Orbital Methods. XII. Further Extensions of Gaussian-Type Basis Sets for Use in Molecular Orbital Studies of Organic Molecules*. *J. Chem. Phys.* 1972, **56**, 2257–2261.
11. a) A. E. Reed, F. J. Weinhold, *Natural bond orbital analysis of near-Hartree–Fock water dimer*. *J. Chem. Phys.* 1983, **78**, 4066 – 4073; b) A. E. Reed, L. A. Curtiss, F. Weinhold, *Intermolecular interactions from a natural bond orbital, donor-acceptor viewpoint*. *Chem. Rev.* 1988, **88**, 899–926.
